# Supplementary material for: Deuterated squalene and sterols from modifiedSaccharomyces cerevisiae
Source: Royal Society of Chemistry journal article supplement (doi:10.1039/d3ob00754e), 2023-01-01

## Deuterated squalene and sterols from modified *Saccharomyces cerevisiae*

SUPPORTING INFORMATION: COPIES OF NMR SPECTRA

Carl Recsei,<sup>†</sup> Robert Russell,<sup>†</sup> Marina Cagnes<sup>†</sup> & Tamim Darwish<sup>†</sup>

<sup>†</sup>Australian Nuclear Science and Technology Organisation  
National Deuteration Facility  
New Illawarra Rd  
Lucas Heights, New South Wales, Australia 2234

| Page | Compound                                                                   | Nucleus                                                     |
|------|----------------------------------------------------------------------------|-------------------------------------------------------------|
| 2    | squalene- <i>d</i> <sub>50</sub> (81%- <i>d</i> )                          | <sup>1</sup> H                                              |
| 3    |                                                                            | <sup>2</sup> H                                              |
| 4    |                                                                            | <sup>13</sup> C{ <sup>1</sup> H, <sup>2</sup> H}            |
| 5    |                                                                            | <sup>13</sup> C{ <sup>1</sup> H, <sup>2</sup> H} expansions |
| 6    |                                                                            | <sup>13</sup> C{ <sup>1</sup> H}                            |
| 7    | cholesterol- <i>d</i> <sub>45</sub> (79%- <i>d</i> )                       | <sup>1</sup> H                                              |
| 8    |                                                                            | <sup>1</sup> H expansions                                   |
| 9    |                                                                            | <sup>2</sup> H                                              |
| 10   |                                                                            | <sup>13</sup> C{ <sup>1</sup> H, <sup>2</sup> H}            |
| 11   |                                                                            | <sup>13</sup> C{ <sup>1</sup> H, <sup>2</sup> H} expansions |
| 12   |                                                                            | <sup>13</sup> C{ <sup>1</sup> H}                            |
| 13   | <sup>13</sup> C{ <sup>1</sup> H} expansions                                |                                                             |
| 14   | cholesterol- <i>d</i> <sub>45</sub> (98%- <i>d</i> )                       | <sup>2</sup> H                                              |
| 15   |                                                                            | <sup>13</sup> C{ <sup>1</sup> H, <sup>2</sup> H}            |
| 16   |                                                                            | <sup>13</sup> C{ <sup>1</sup> H, <sup>2</sup> H} expansions |
| 17   |                                                                            | <sup>13</sup> C{ <sup>1</sup> H}                            |
| 18   | O-TBS-22,23-dihydrobrassicasterol- <i>d</i> <sub>47</sub> (87%- <i>d</i> ) | <sup>1</sup> H                                              |
| 19   |                                                                            | <sup>1</sup> H expansions                                   |
| 20   |                                                                            | <sup>2</sup> H                                              |
| 21   |                                                                            | <sup>13</sup> C{ <sup>1</sup> H, <sup>2</sup> H}            |
| 22   |                                                                            | <sup>13</sup> C{ <sup>1</sup> H, <sup>2</sup> H} expansions |
| 23   |                                                                            | <sup>13</sup> C{ <sup>1</sup> H}                            |
| 24   |                                                                            | <sup>13</sup> C{ <sup>1</sup> H} expansions                 |
| 25   | O-TBS-24-methylenecholesterol- <i>d</i> <sub>45</sub> (87%- <i>d</i> )     | <sup>1</sup> H                                              |
| 26   |                                                                            | <sup>1</sup> H expansions                                   |
| 27   |                                                                            | <sup>2</sup> H                                              |
| 28   |                                                                            | <sup>13</sup> C{ <sup>1</sup> H, <sup>2</sup> H}            |
| 29   |                                                                            | <sup>13</sup> C{ <sup>1</sup> H, <sup>2</sup> H} expansions |
| 30   |                                                                            | <sup>13</sup> C{ <sup>1</sup> H}                            |
| 31   |                                                                            | <sup>13</sup> C{ <sup>1</sup> H} expansions                 |
| 32   | 22,23-dihydrobrassicasterol- <i>d</i> <sub>47</sub> (87%- <i>d</i> )       | <sup>1</sup> H                                              |
| 33   |                                                                            | <sup>2</sup> H                                              |
| 34   |                                                                            | <sup>13</sup> C{ <sup>1</sup> H, <sup>2</sup> H}            |
| 35   |                                                                            | <sup>13</sup> C{ <sup>1</sup> H, <sup>2</sup> H} expansions |
| 36   |                                                                            | <sup>13</sup> C{ <sup>1</sup> H}                            |
| 37   | 24-methylenecholesterol- <i>d</i> <sub>45</sub> (87%- <i>d</i> )           | <sup>1</sup> H                                              |
| 38   |                                                                            | <sup>2</sup> H                                              |
| 39   |                                                                            | <sup>13</sup> C{ <sup>1</sup> H, <sup>2</sup> H}            |
| 40   |                                                                            | <sup>13</sup> C{ <sup>1</sup> H, <sup>2</sup> H} expansions |
| 41   |                                                                            | <sup>13</sup> C{ <sup>1</sup> H}                            |

squalene-*d*<sub>50</sub> (81%-*d*) <sup>1</sup>H NMR

F2 - Acquisition Parameters  
 Date\_ 20220816  
 Time 9.26 h  
 INSTRUM spect  
 PROBHD Z108618\_0117 (  
 PULPROG zg  
 TD 180070  
 SOLVENT CDCl3  
 NS 3  
 DS 2  
 SWH 6002.401 Hz  
 FIDRES 0.066667 Hz  
 AQ 14.9998312 sec  
 RG 144  
 DW 83.300 usec  
 DE 16.70 usec  
 TE 298.0 K  
 D1 30.00000000 sec  
 TD0 1  
 SFO1 400.1320007 MHz  
 NUC1 1H  
 P1 15.00 usec  
 PLW1 14.03299999 W

F2 - Processing parameters  
 SI 32768  
 SF 400.1300088 MHz  
 WDW no  
 SSB 0  
 LB 0 Hz  
 GB 0  
 PC 1.00

7.263

5.111

2.036  
 1.974  
 1.955  
 1.579  
 1.560

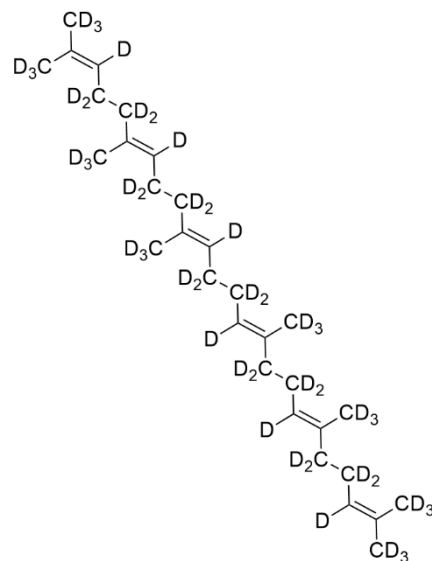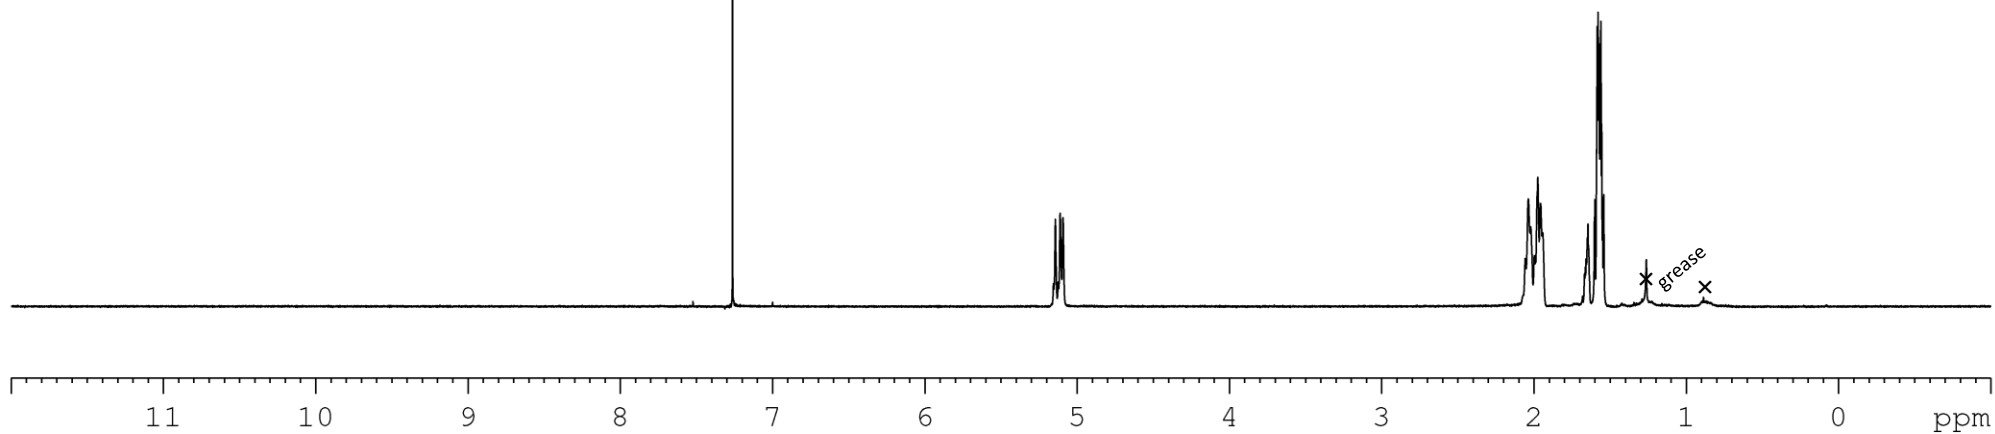

squalene-*d*<sub>50</sub> (81%-*d*) <sup>2</sup>H NMR

F2 - Acquisition Parameters  
 Date\_ 20220816  
 Time 9.20 h  
 INSTRUM spect  
 PROBHD Z108618\_0117 (  
 PULPROG zg2h  
 TD 8192  
 SOLVENT CDCl3  
 NS 31  
 DS 0  
 SWH 921.376 Hz  
 FIDRES 0.224945 Hz  
 AQ 4.4455252 sec  
 RG 45.2  
 DW 542.667 usec  
 DE 23.73 usec  
 TE 298.0 K  
 D1 5.00000000 sec  
 D11 0.03000000 sec  
 TD0 1  
 SFO1 61.4226988 MHz  
 NUC1 2H  
 P1 124.00 usec  
 PLW1 29.89100075 W

F2 - Processing parameters  
 SI 16384  
 SF 61.4223931 MHz  
 WDW EM  
 SSB 0  
 LB 0.30 Hz  
 GB 0  
 PC 1.00

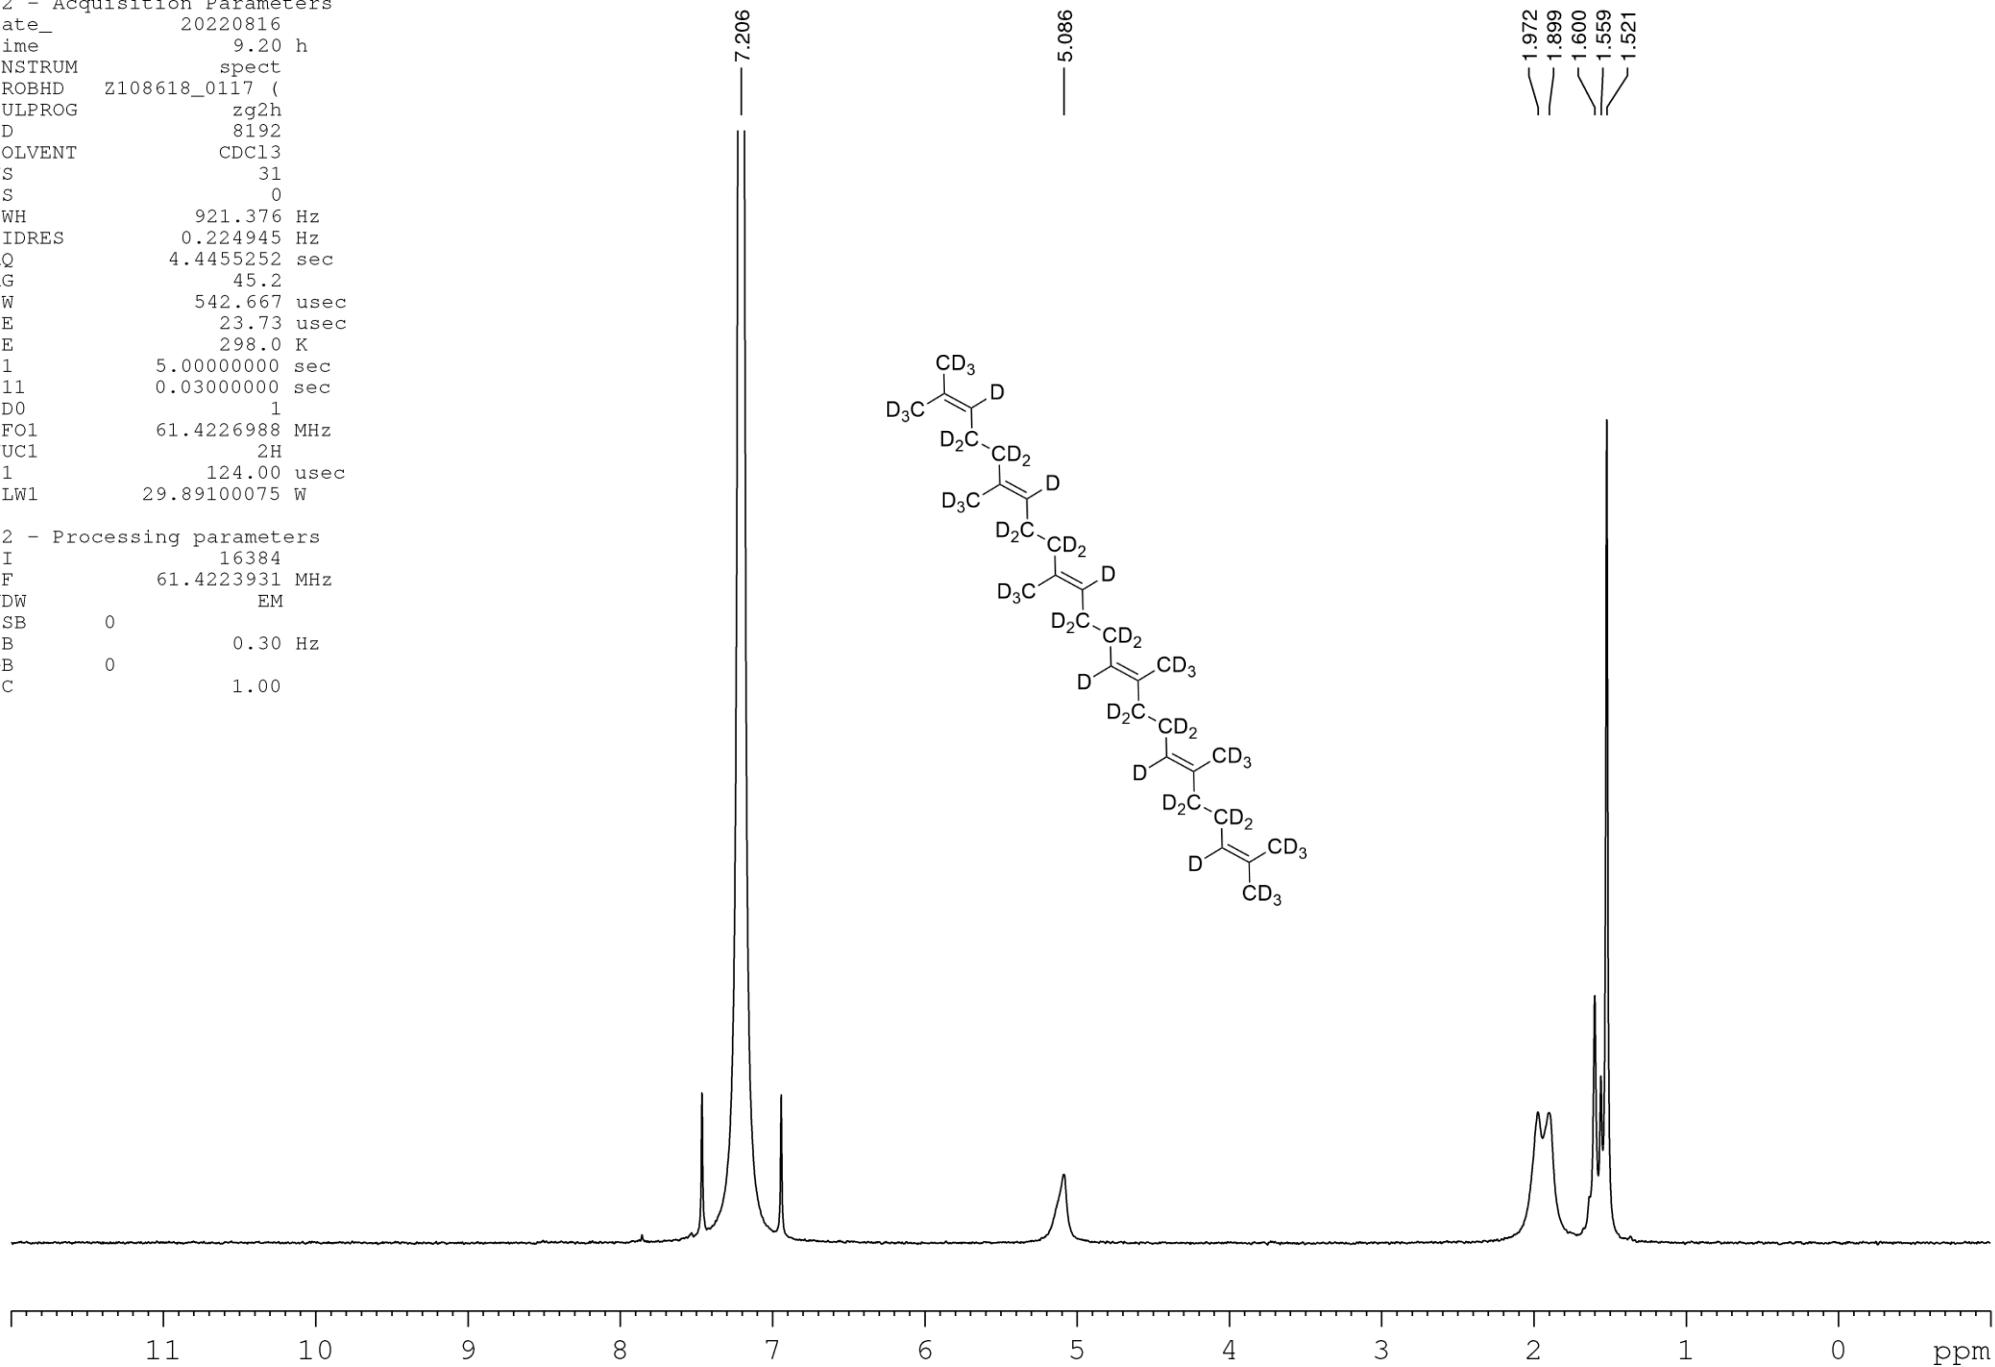

squalene-*d*<sub>50</sub> (81%-*d*) <sup>13</sup>C{<sup>1</sup>H,<sup>2</sup>H} NMR

F2 - Acquisition Parameters

Date\_ 20220822  
 Time 9.07 h  
 INSTRUM spect  
 PROBHD Z108618\_0117 (  
 PULPROG zgig2h1h  
 TD 65536  
 SOLVENT CDC13  
 NS 753  
 DS 0  
 SWH 22058.824 Hz  
 FIDRES 0.673182 Hz  
 AQ 1.4854827 sec  
 RG 203  
 DW 22.667 usec  
 DE 6.50 usec  
 TE 298.0 K  
 D1 300.00000000 sec  
 D11 0.03000000 sec  
 D12 0.00002000 sec  
 TD0 1  
 SFO1 100.6223263 MHz  
 NUC1 13C  
 P1 10.00 usec  
 PLW1 84.53199768 W  
 SFO2 400.1322007 MHz  
 NUC2 1H  
 CPDPRG[2] waltz16  
 PCPD2 90.00 usec  
 PLW2 14.03299999 W  
 PLW12 0.38982001 W  
 SFO3 61.4227600 MHz  
 NUC3 2H  
 CPDPRG[3] waltz16  
 PCPD3 375.00 usec  
 PLW3 29.89100075 W  
 PLW17 3.06999993 W

F2 - Processing parameters  
 SI 65536  
 SF 100.6127555 MHz  
 WDW EM  
 SSB 0  
 LB 1.00 Hz  
 GB 0  
 PC 1.40

134.974  
 134.775  
 131.061  
 124.153  
 124.000  
 123.978

77.160

38.854  
 38.833  
 27.419  
 25.940  
 25.835  
 24.825  
 16.899  
 15.227

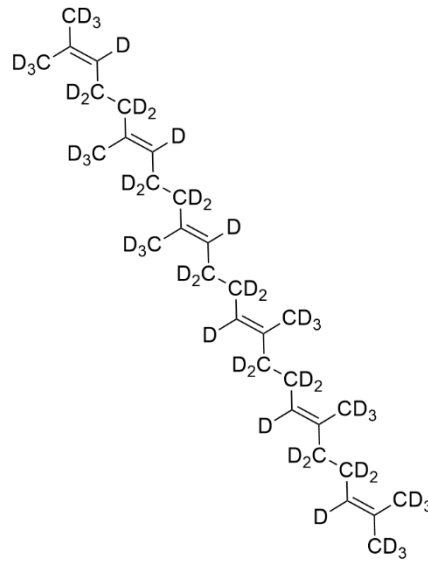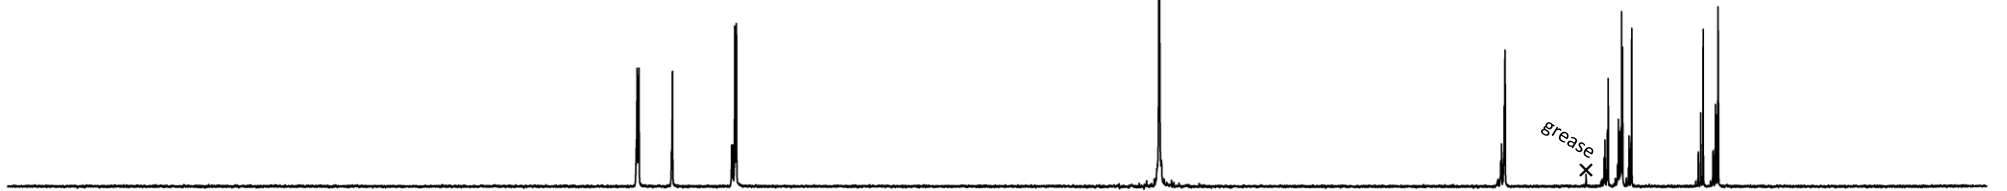

200 190 180 170 160 150 140 130 120 110 100 90 80 70 60 50 40 30 20 10 0 ppm

4.007  
 2.001  
 6.013

3.995  
 2.018  
 4.003  
 2.005  
 1.985  
 3.974

squalene-*d*<sub>50</sub> (81%-*d*) <sup>13</sup>C{<sup>1</sup>H,<sup>2</sup>H} NMR expansions

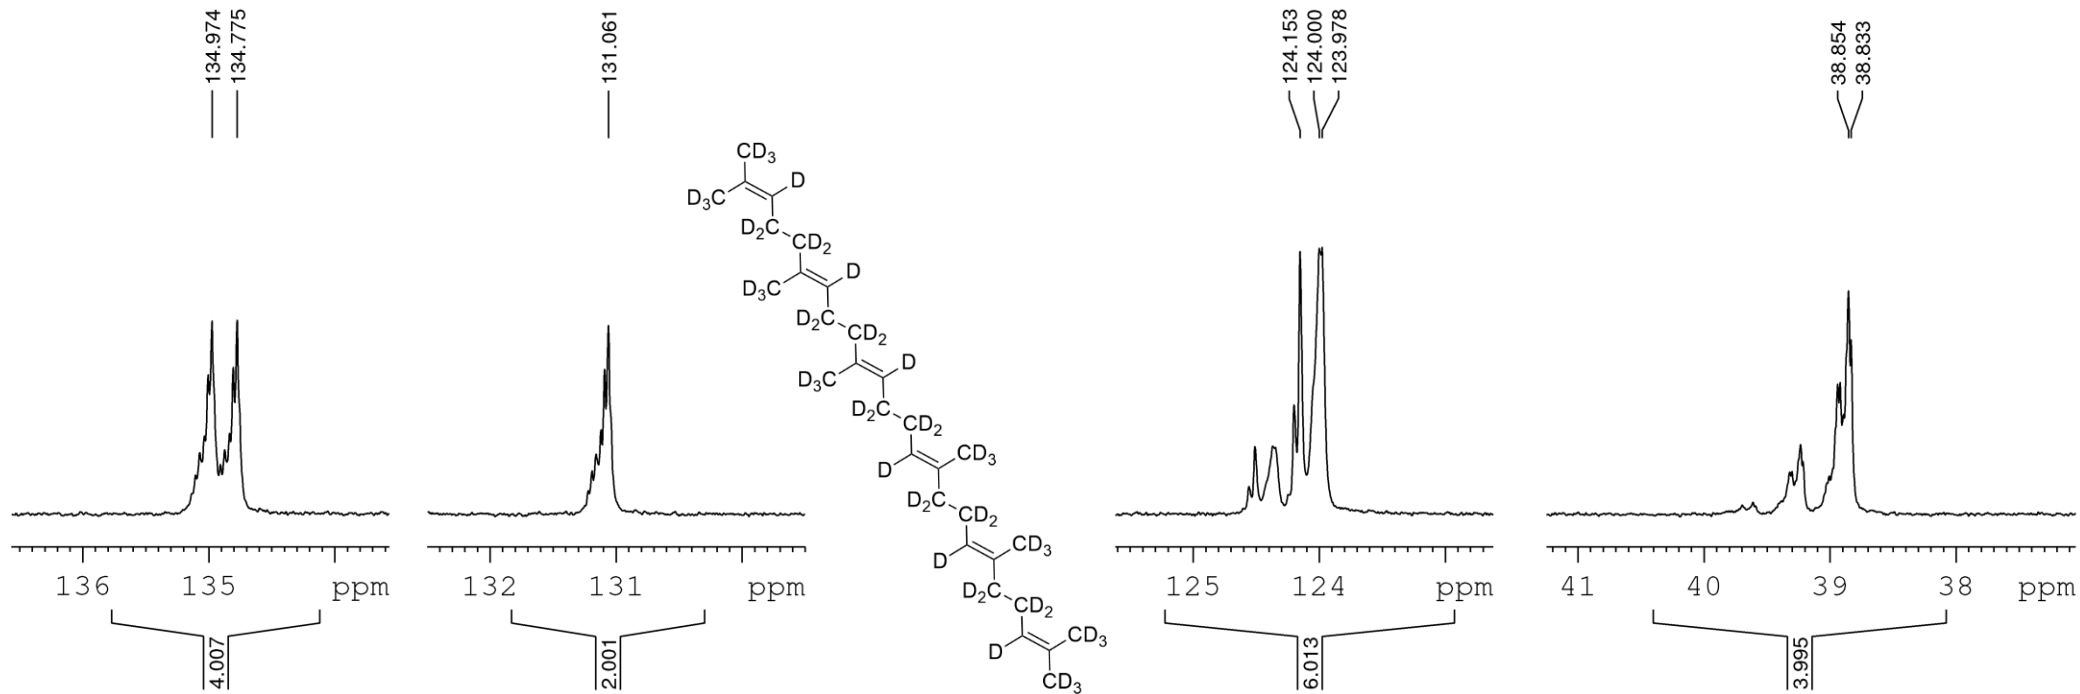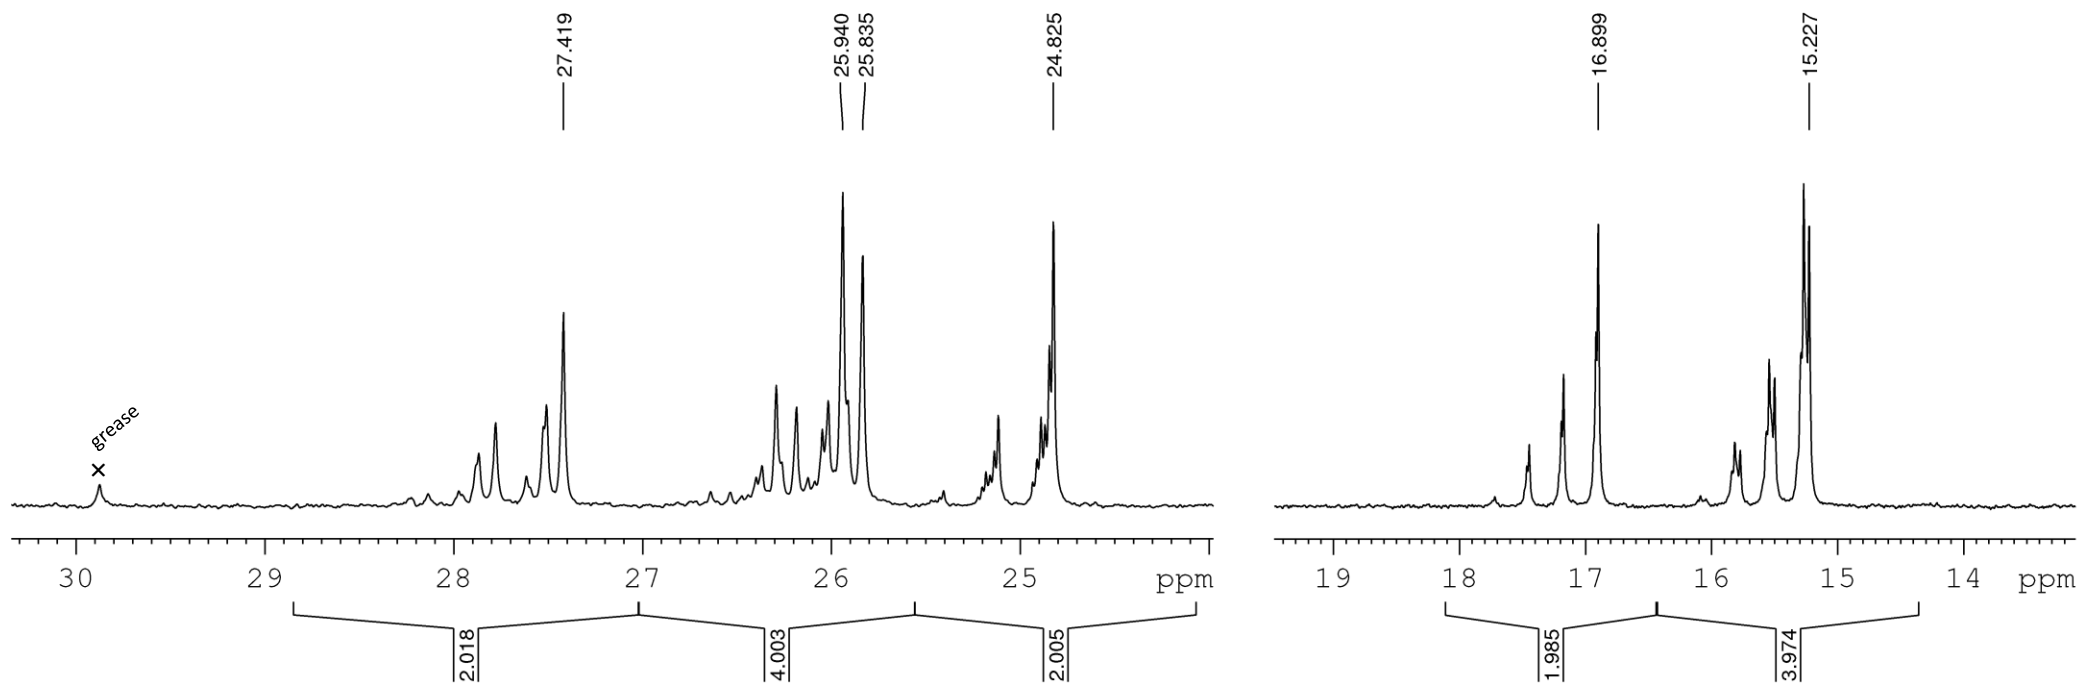

squalene-*d*<sub>50</sub> (81%-*d*) <sup>13</sup>C{<sup>1</sup>H} NMR

F2 - Acquisition Parameters  
 Date\_ 20220818  
 Time 9.46 h  
 INSTRUM spect  
 PROBHD z108618\_0117 (  
 PULPROG zgpg30  
 TD 65536  
 SOLVENT CDCl3  
 NS 1054  
 DS 4  
 SWH 22058.824 Hz  
 FIDRES 0.673182 Hz  
 AQ 1.4854827 sec  
 RG 203  
 DW 22.667 usec  
 DE 8.02 usec  
 TE 298.0 K  
 D1 2.00000000 sec  
 D11 0.03000000 sec  
 TD0 1  
 SFO1 100.6223248 MHz  
 NUC1 13C  
 P1 10.00 usec  
 PLW1 84.53199768 W  
 SFO2 400.1320007 MHz  
 NUC2 1H  
 CPDPRG[2] waltz16  
 PCPD2 90.00 usec  
 PLW2 14.03299999 W  
 PLW12 0.38982001 W  
 PLW13 0.19607000 W

F2 - Processing parameters  
 SI 65536  
 SF 100.6127551 MHz  
 WDW EM  
 SSB 0  
 LB 1.00 Hz  
 GB 0  
 PC 1.40

134.977  
 131.064  
 124.374  
 77.160  
 39.072  
 27.797  
 26.199  
 15.547

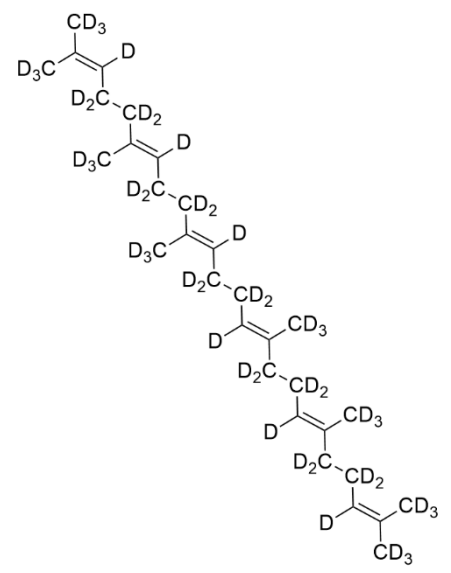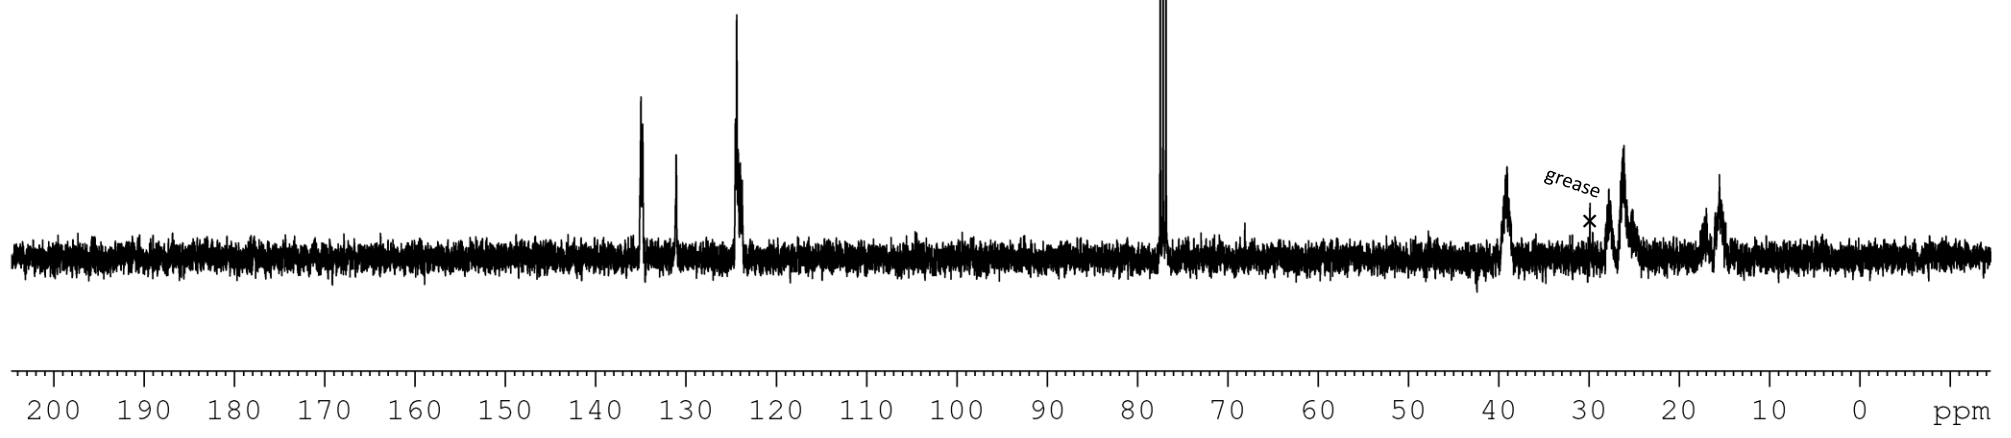

cholesterol-*d*<sub>45</sub> (79%-*d*) <sup>1</sup>H NMR

F2 - Acquisition Parameters  
 Date\_ 20220610  
 Time 17.45 h  
 INSTRUM spect  
 PROBHD Z108618\_0117 (  
 PULPROG zg  
 TD 120046  
 SOLVENT CDCl3  
 NS 4  
 DS 0  
 SWH 6002.401 Hz  
 FIDRES 0.100002 Hz  
 AQ 9.9998322 sec  
 RG 18  
 DW 83.300 usec  
 DE 16.70 usec  
 TE 298.0 K  
 D1 10.00000000 sec  
 TD0 1  
 SFO1 400.1320007 MHz  
 NUC1 1H  
 P1 15.00 usec  
 PLW1 14.03299999 W

F2 - Processing parameters  
 SI 32768  
 SF 400.1300000 MHz  
 WDW no  
 SSB 0  
 LB 0 Hz  
 GB 0  
 PC 1.00

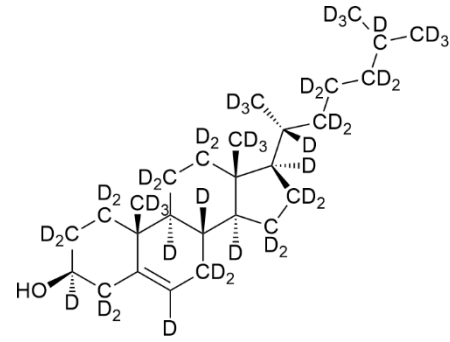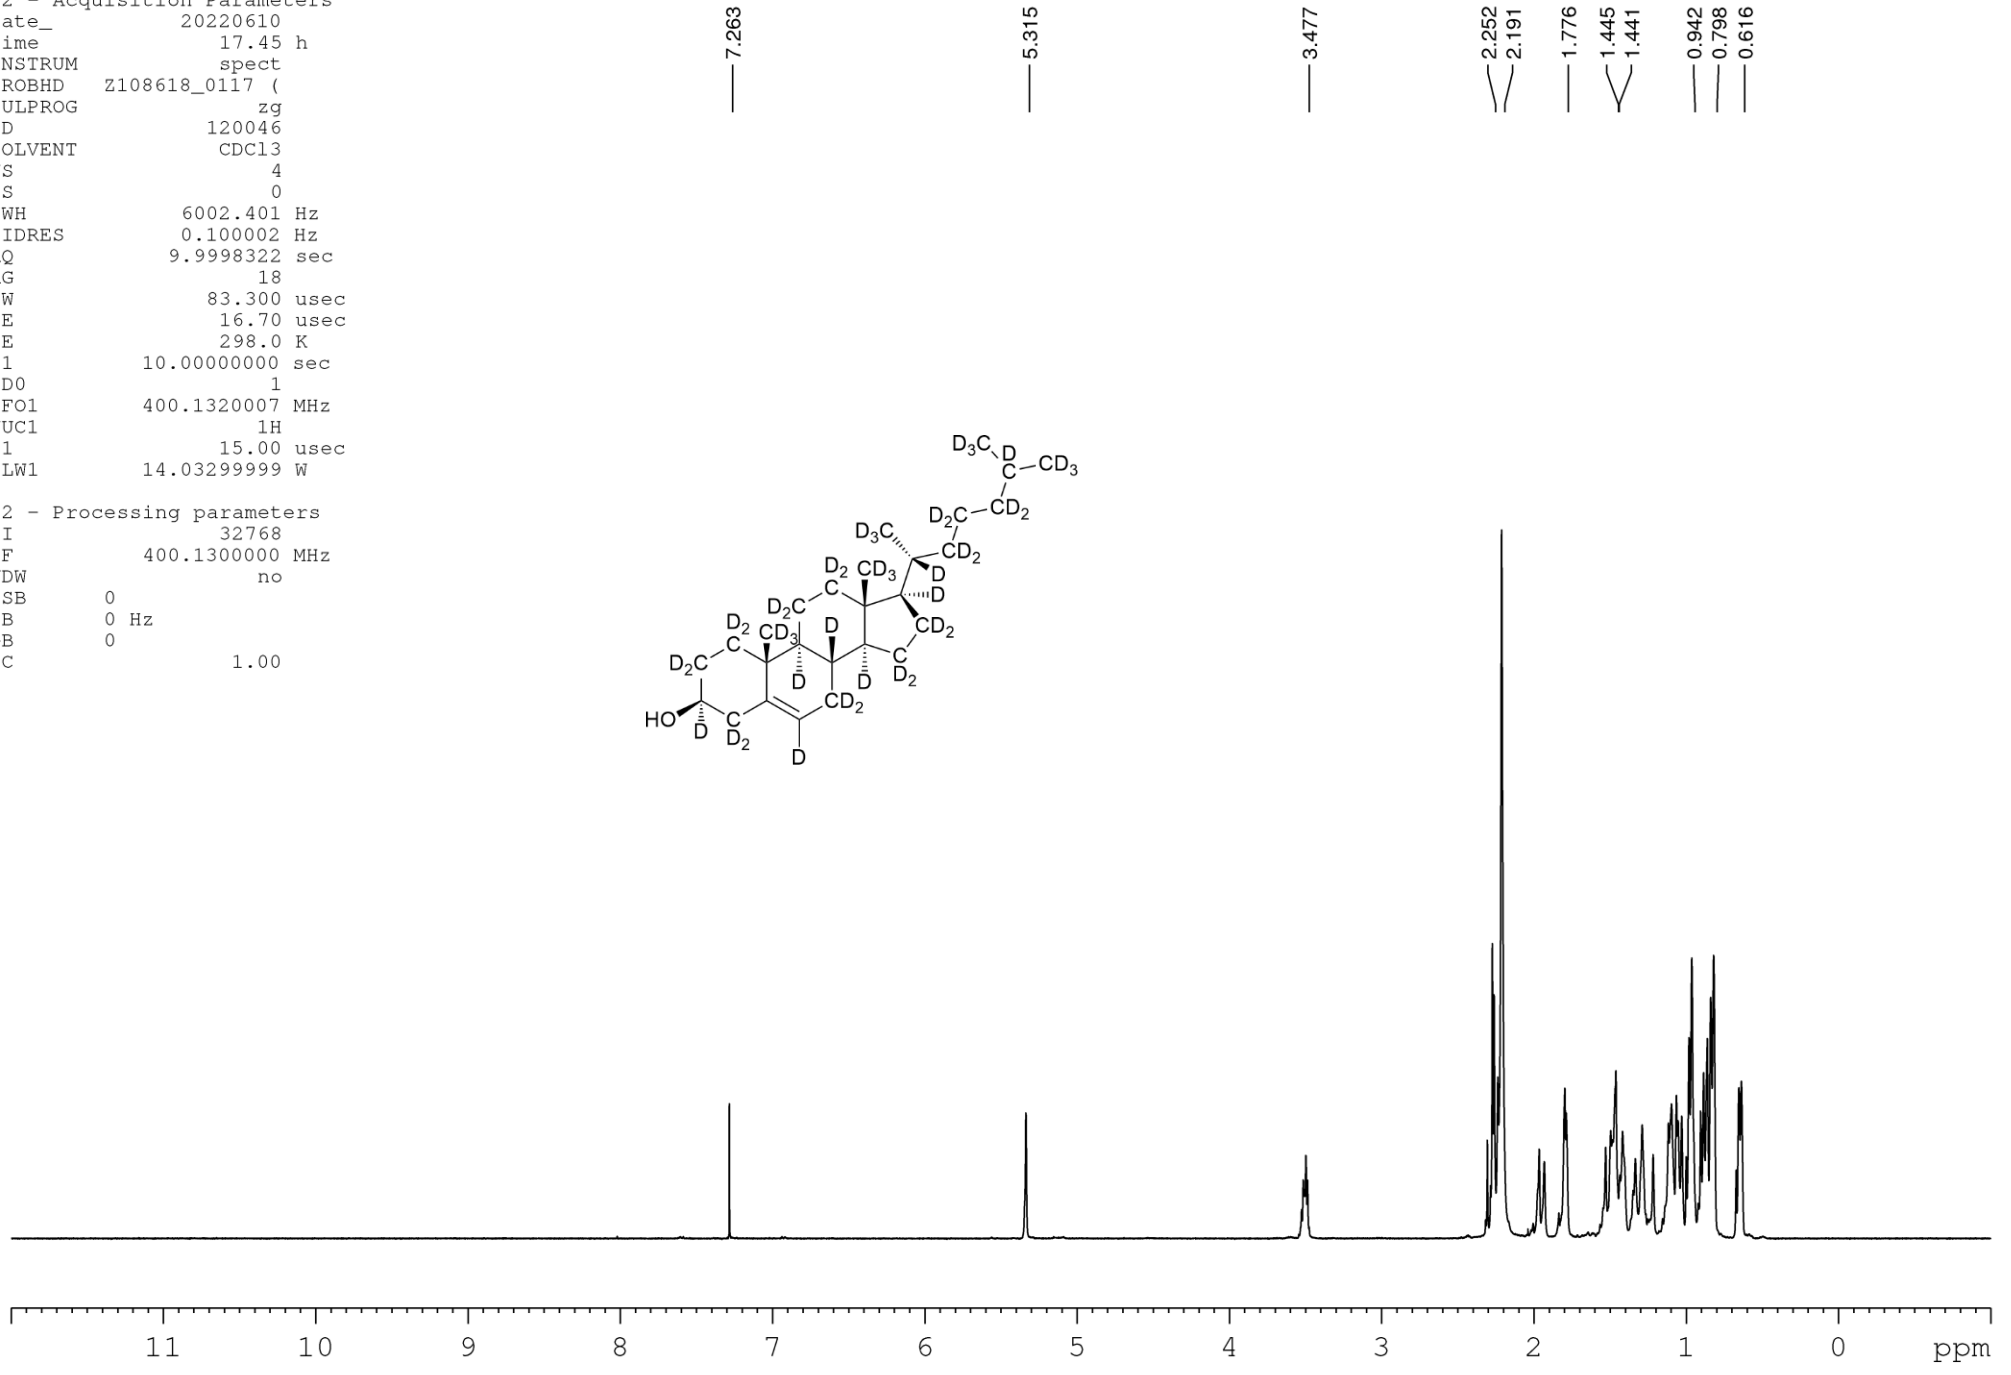

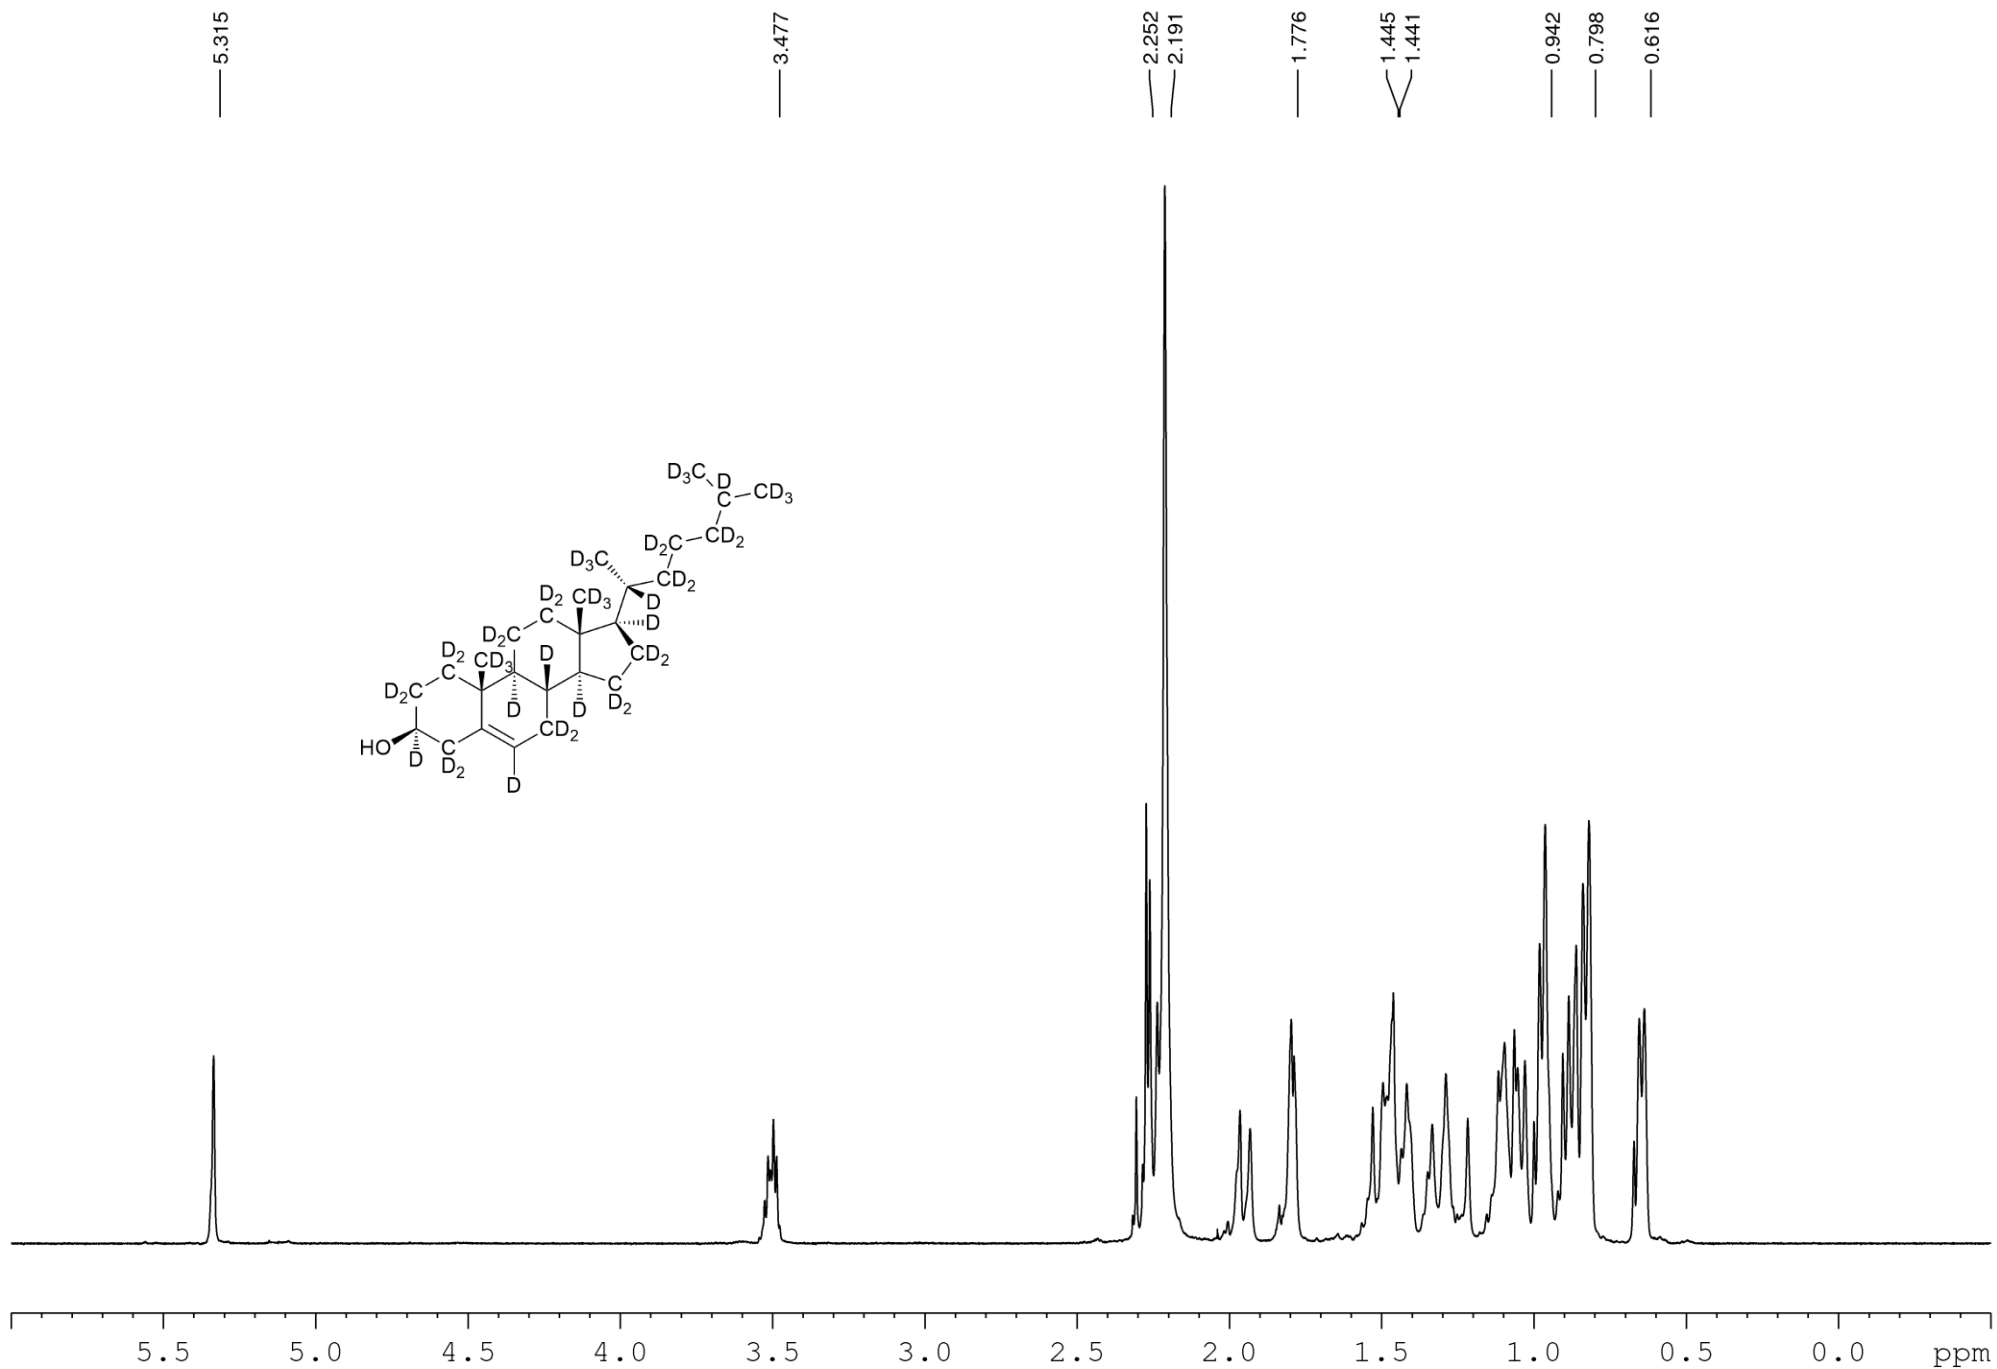



cholesterol-*d*<sub>45</sub> (79%-*d*) <sup>2</sup>H NMR

F2 - Acquisition Parameters  
 Date\_ 20211027  
 Time 10.42 h  
 INSTRUM spect  
 PROBHD Z108618\_0117 (  
 PULPROG zg2h  
 TD 8192  
 SOLVENT CDCl3  
 NS 20  
 DS 0  
 SWH 921.376 Hz  
 FIDRES 0.224945 Hz  
 AQ 4.4455252 sec  
 RG 114  
 DW 542.667 usec  
 DE 23.73 usec  
 TE 298.0 K  
 D1 2.00000000 sec  
 D11 0.03000000 sec  
 TD0 1  
 SFO1 61.4226988 MHz  
 NUC1 2H  
 P1 124.00 usec  
 PLW1 29.89100075 W

F2 - Processing parameters  
 SI 16384  
 SF 61.4223931 MHz  
 WDW EM  
 SSB 0  
 LB 1.00 Hz  
 GB 0  
 PC 1.00

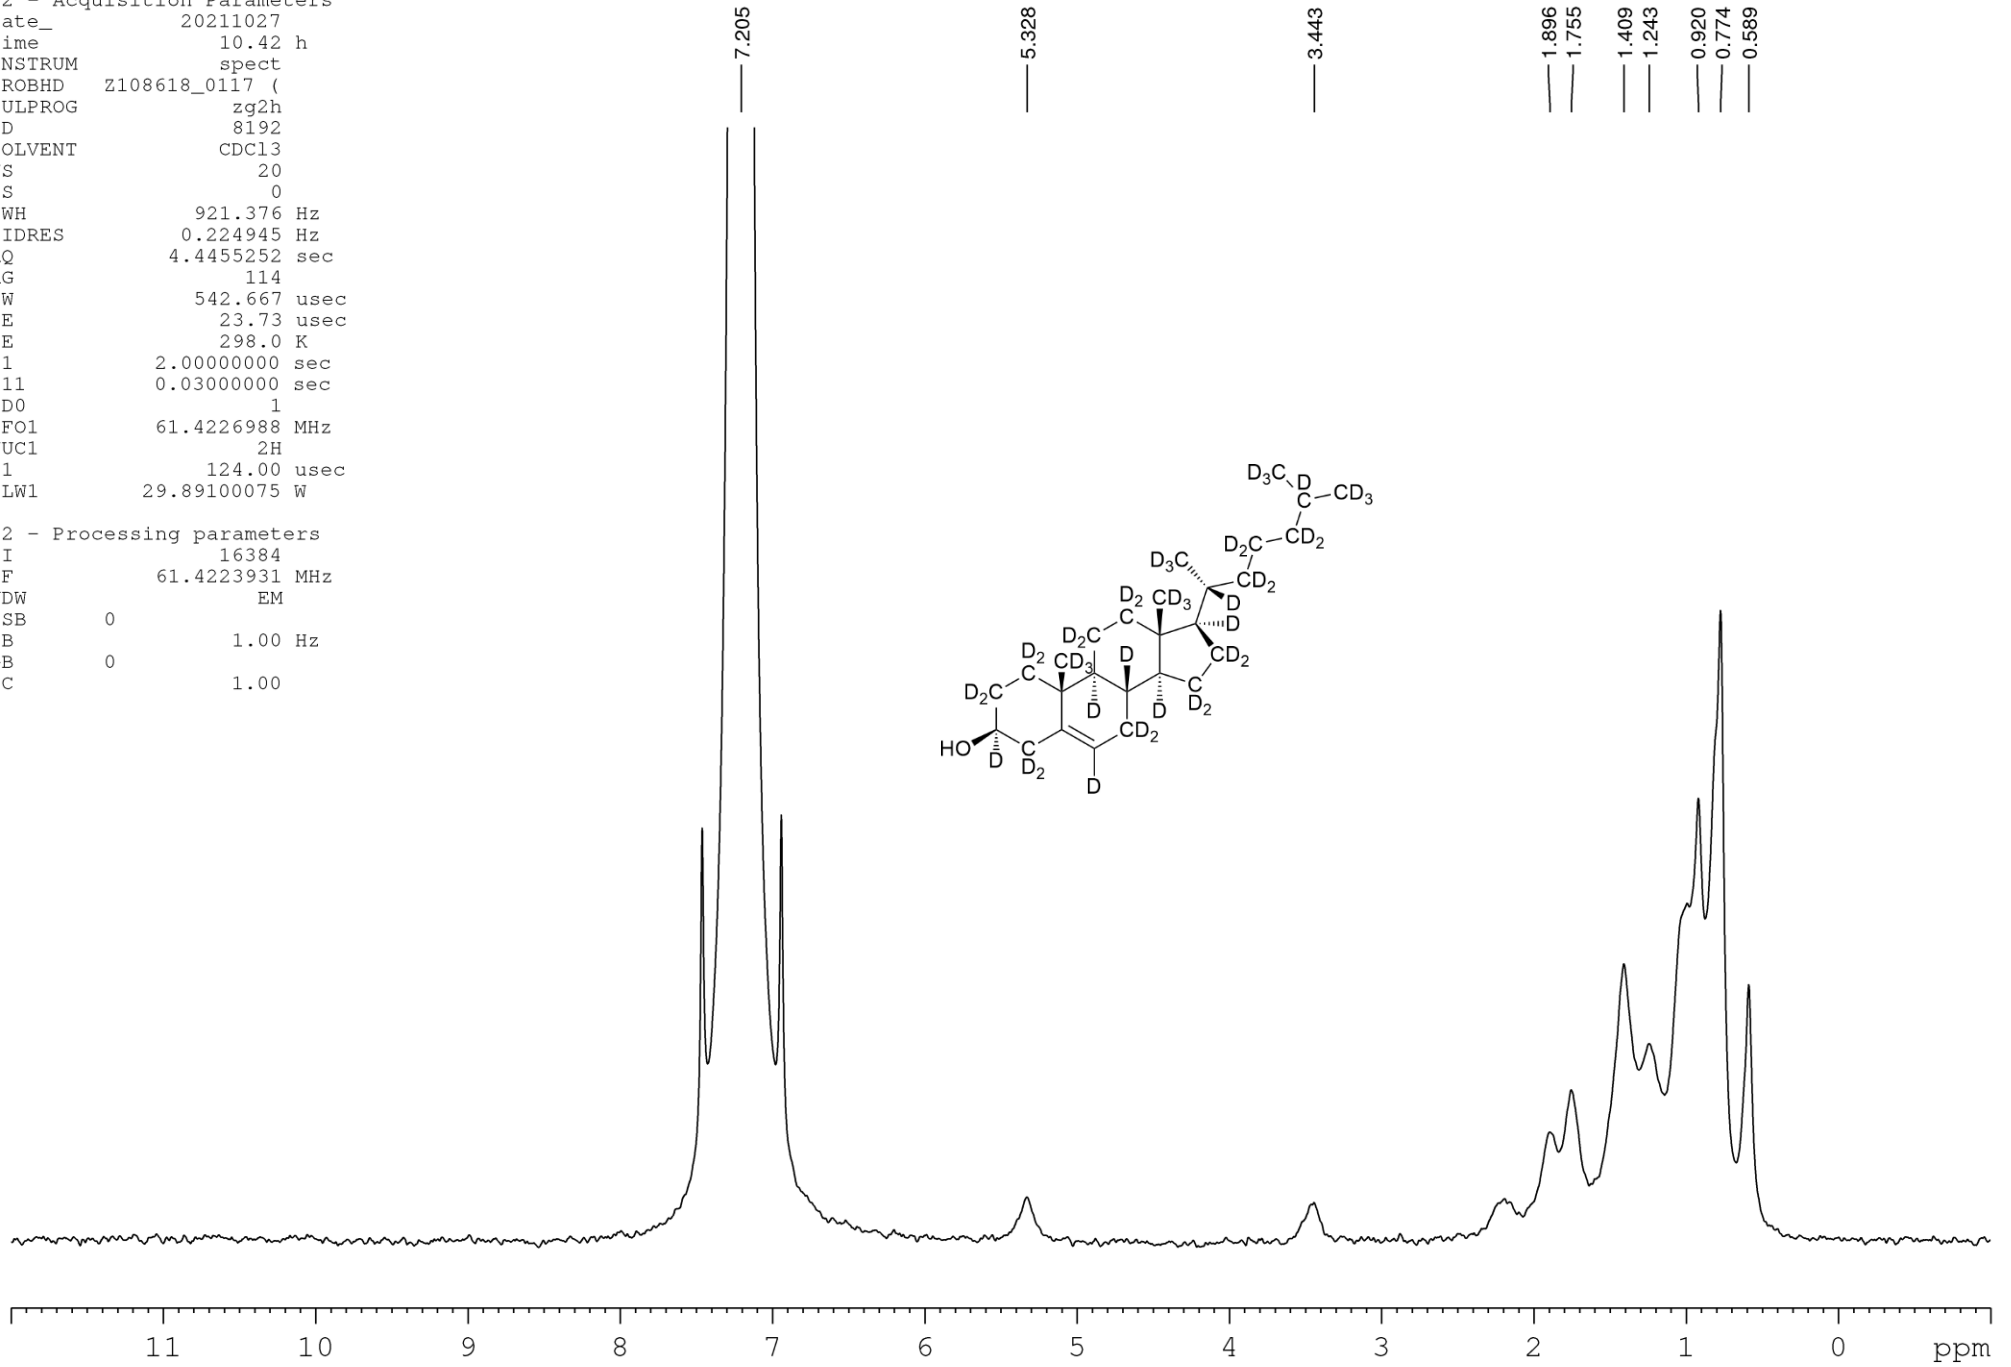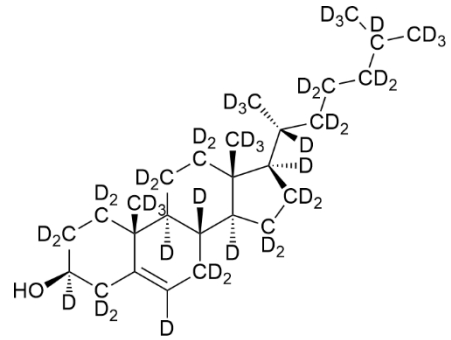

cholesterol-d<sub>45</sub> (79%-d) <sup>13</sup>C{<sup>1</sup>H,<sup>2</sup>H} NMR

```

F2 - Acquisition Parameters
Date_      20220718
Time       13.34 h
INSTRUM    spect
PROBHD     Z108618_0117 (
PULPROG    zgig2h1h
TD         132350
SOLVENT    CDCl3
NS         7363
DS         2
SWH        22058.824 Hz
FIDRES     0.333341 Hz
AQ         2.9999332 sec
RG         203
DW         22.667 usec
DE         6.50 usec
TE         297.9 K
D1         30.00000000 sec
D11        0.03000000 sec
D12        0.00002000 sec
TD0        1
SFO1       100.6223263 MHz
NUC1       13C
P1         10.00 usec
PLW1       84.53199768 W
SFO2       400.1322007 MHz
NUC2       1H
CPDPRG[2]  waltz16
PCPD2      90.00 usec
PLW2       14.03299999 W
PLW12      0.38982001 W
SFO3       61.4227600 MHz
NUC3       2H
CPDPRG[3]  waltz16
PCPD3      375.00 usec
PLW3       29.89100075 W
PLW17      3.06999993 W
    
```

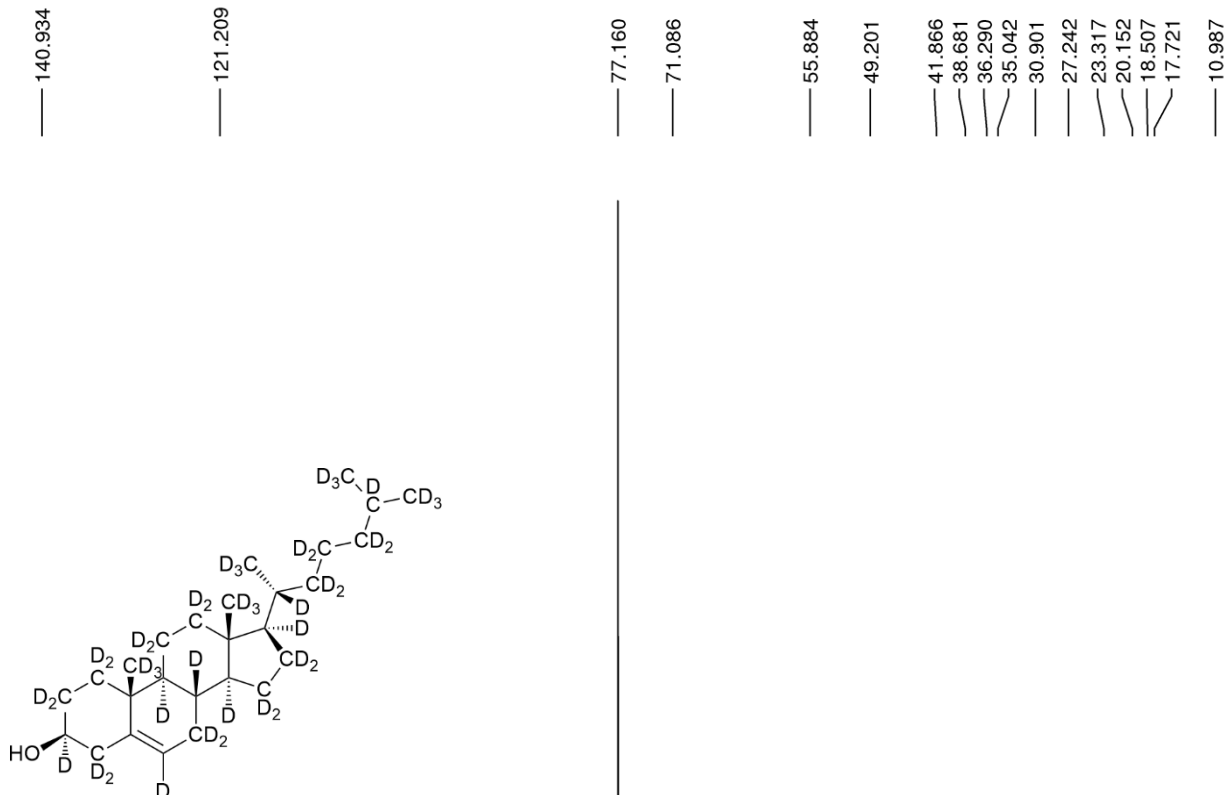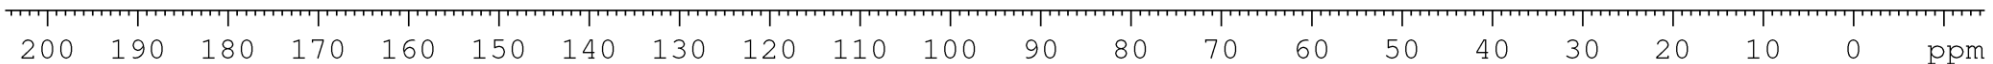

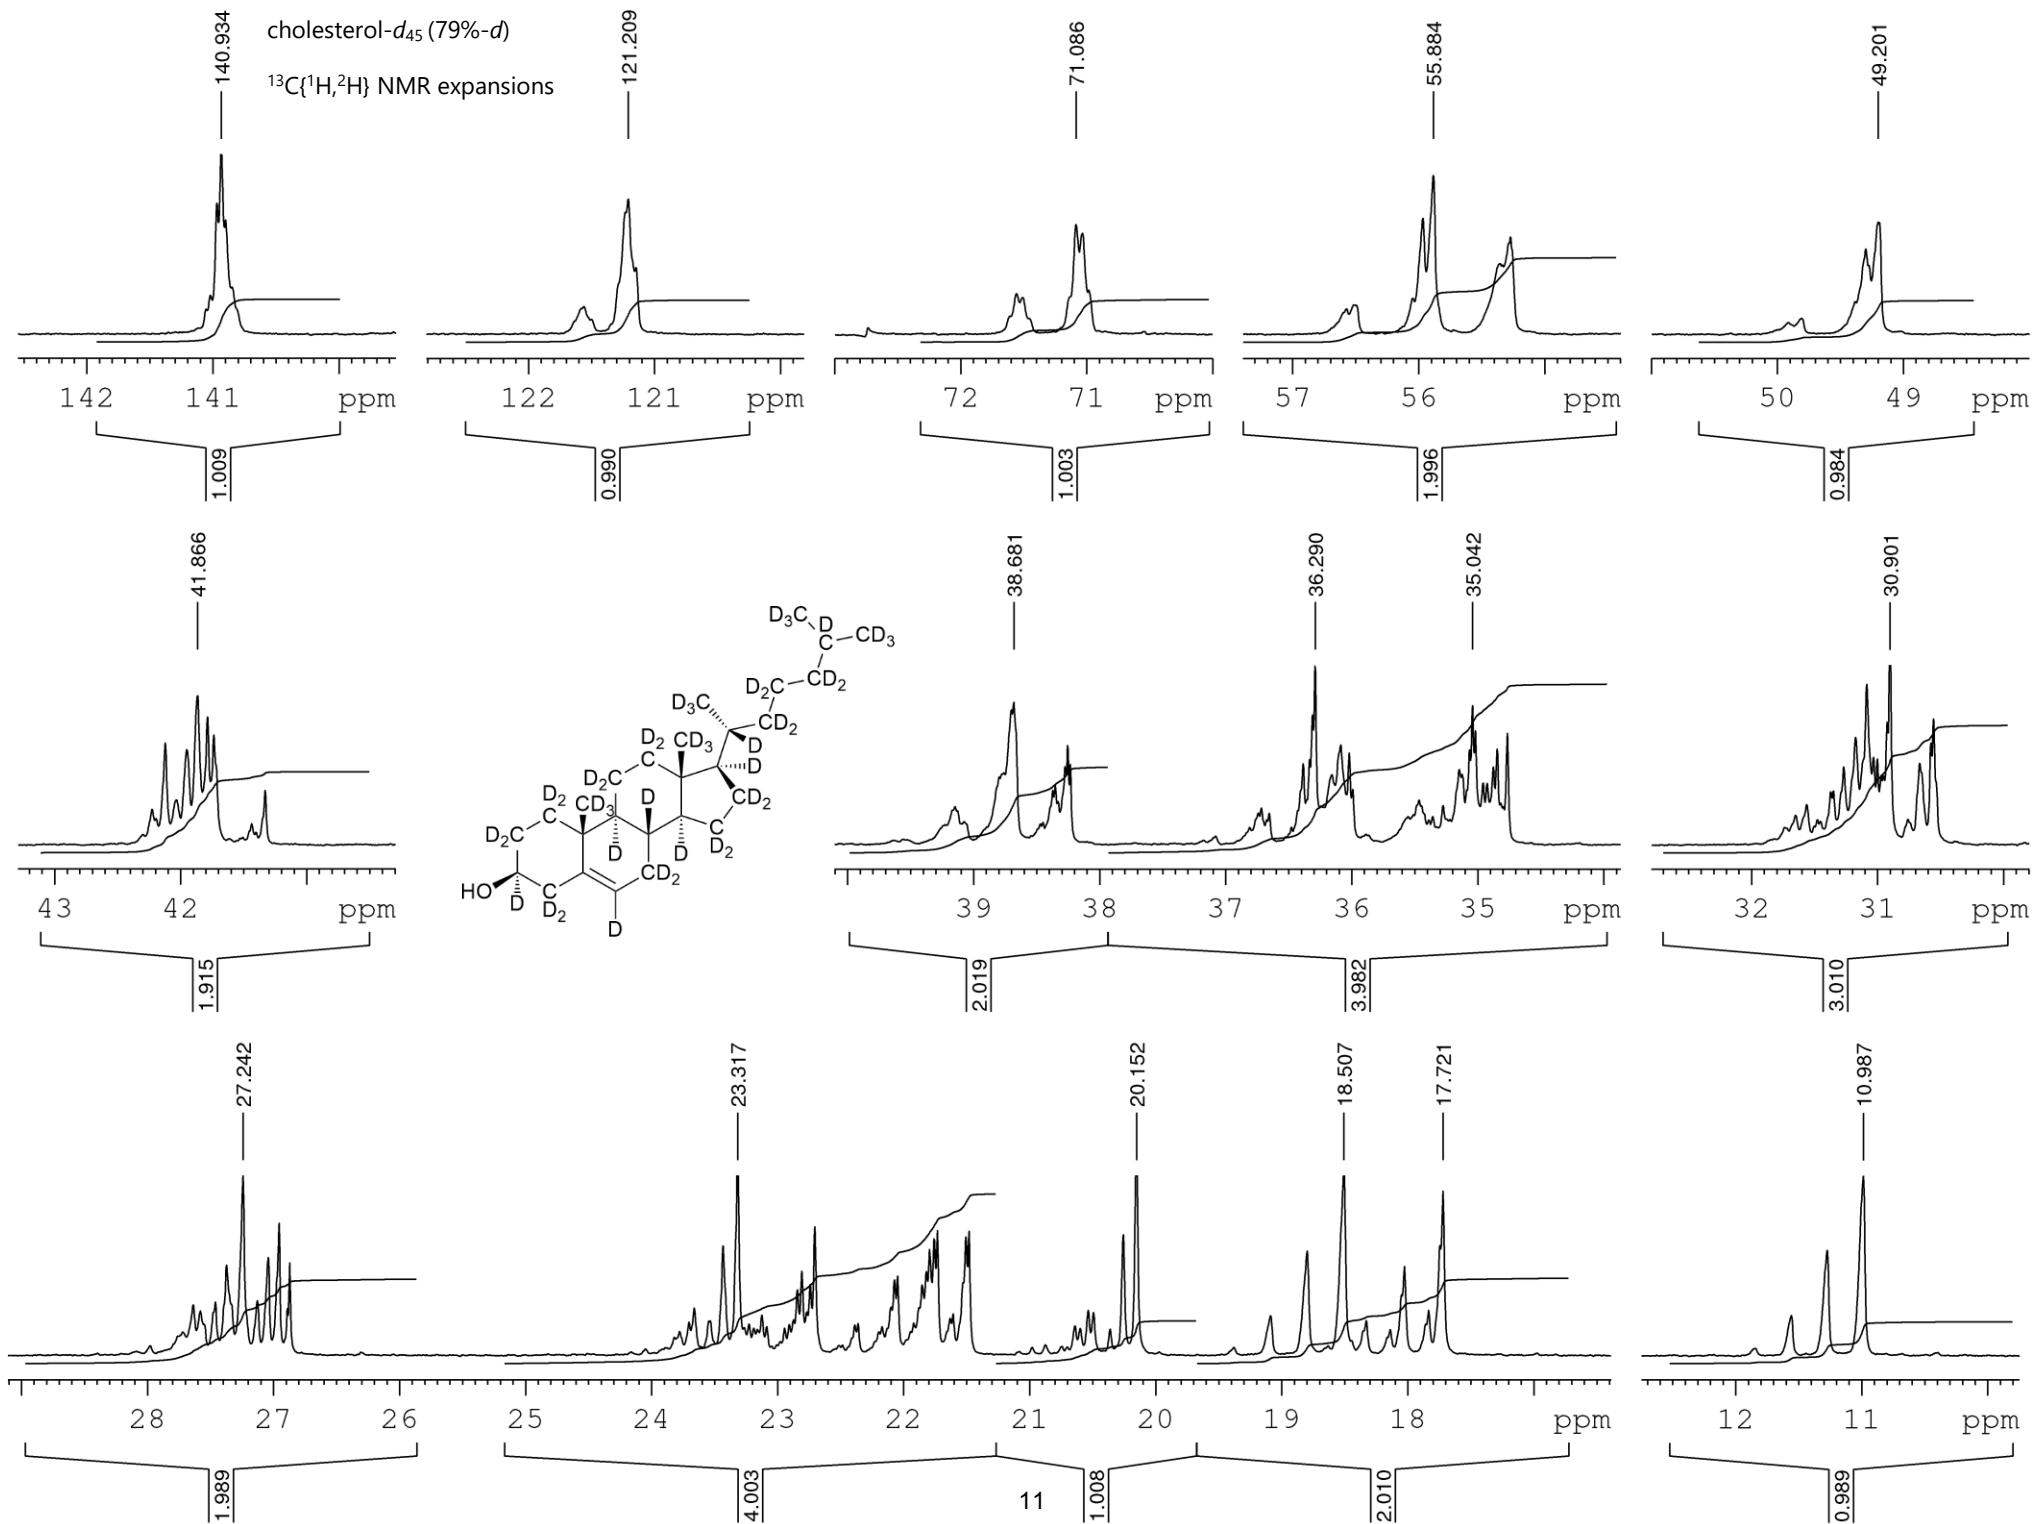

cholesterol-*d*<sub>45</sub> (79%-*d*) <sup>13</sup>C{<sup>1</sup>H} NMR

F2 - Acquisition Parameters  
 Date\_ 20220614  
 Time 10.53 h  
 INSTRUM spect  
 PROBHD z108618\_0117 (  
 PULPROG zgpg30  
 TD 65536  
 SOLVENT CDCl3  
 NS 2308  
 DS 4  
 SWH 22058.824 Hz  
 FIDRES 0.673182 Hz  
 AQ 1.4854827 sec  
 RG 203  
 DW 22.667 usec  
 DE 8.02 usec  
 TE 298.0 K  
 D1 2.00000000 sec  
 D11 0.03000000 sec  
 TD0 1  
 SFO1 100.6223248 MHz  
 NUC1 13C  
 P1 10.00 usec  
 PLW1 84.53199768 W  
 SFO2 400.1320007 MHz  
 NUC2 1H  
 CPDPRG[2] waltz16  
 PCPD2 90.00 usec  
 PLW2 14.03299999 W  
 PLW12 0.38982001 W  
 PLW13 0.19607000 W

F2 - Processing parameters  
 SI 65536  
 SF 100.6127685 MHz  
 WDW EM  
 SSB 0  
 LB 1.00 Hz  
 GB 0  
 PC 1.40

140.935  
 121.620  
 77.160  
 71.644  
 71.596  
 55.890  
 42.149  
 36.116  
 31.584  
 27.572  
 27.484  
 27.407  
 22.065  
 21.863  
 11.300

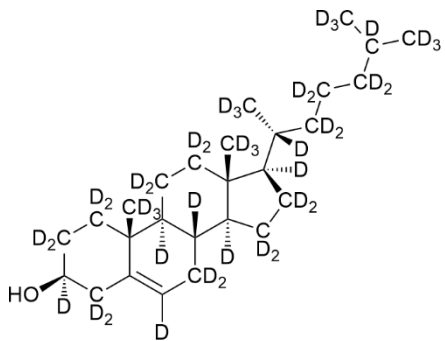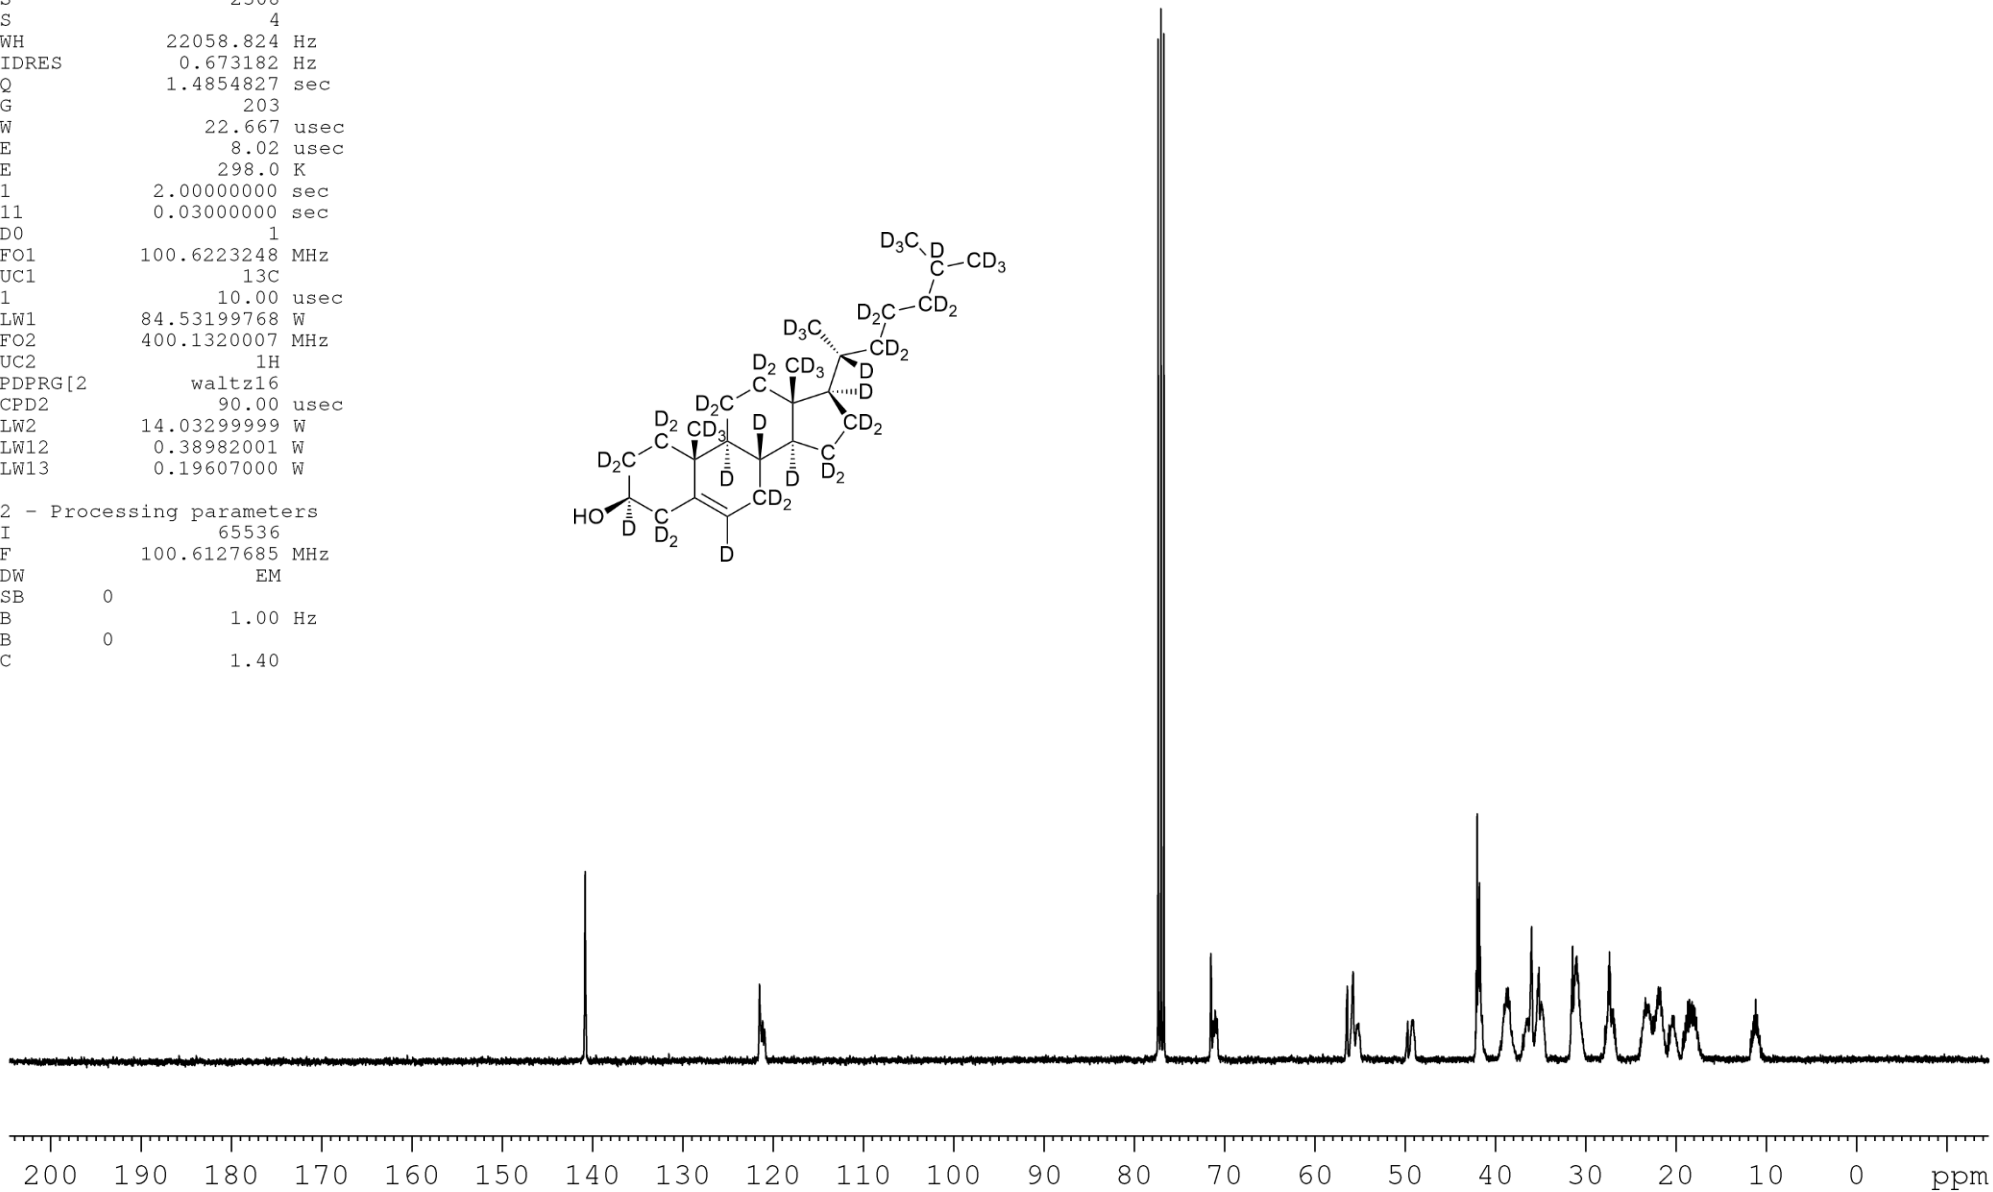

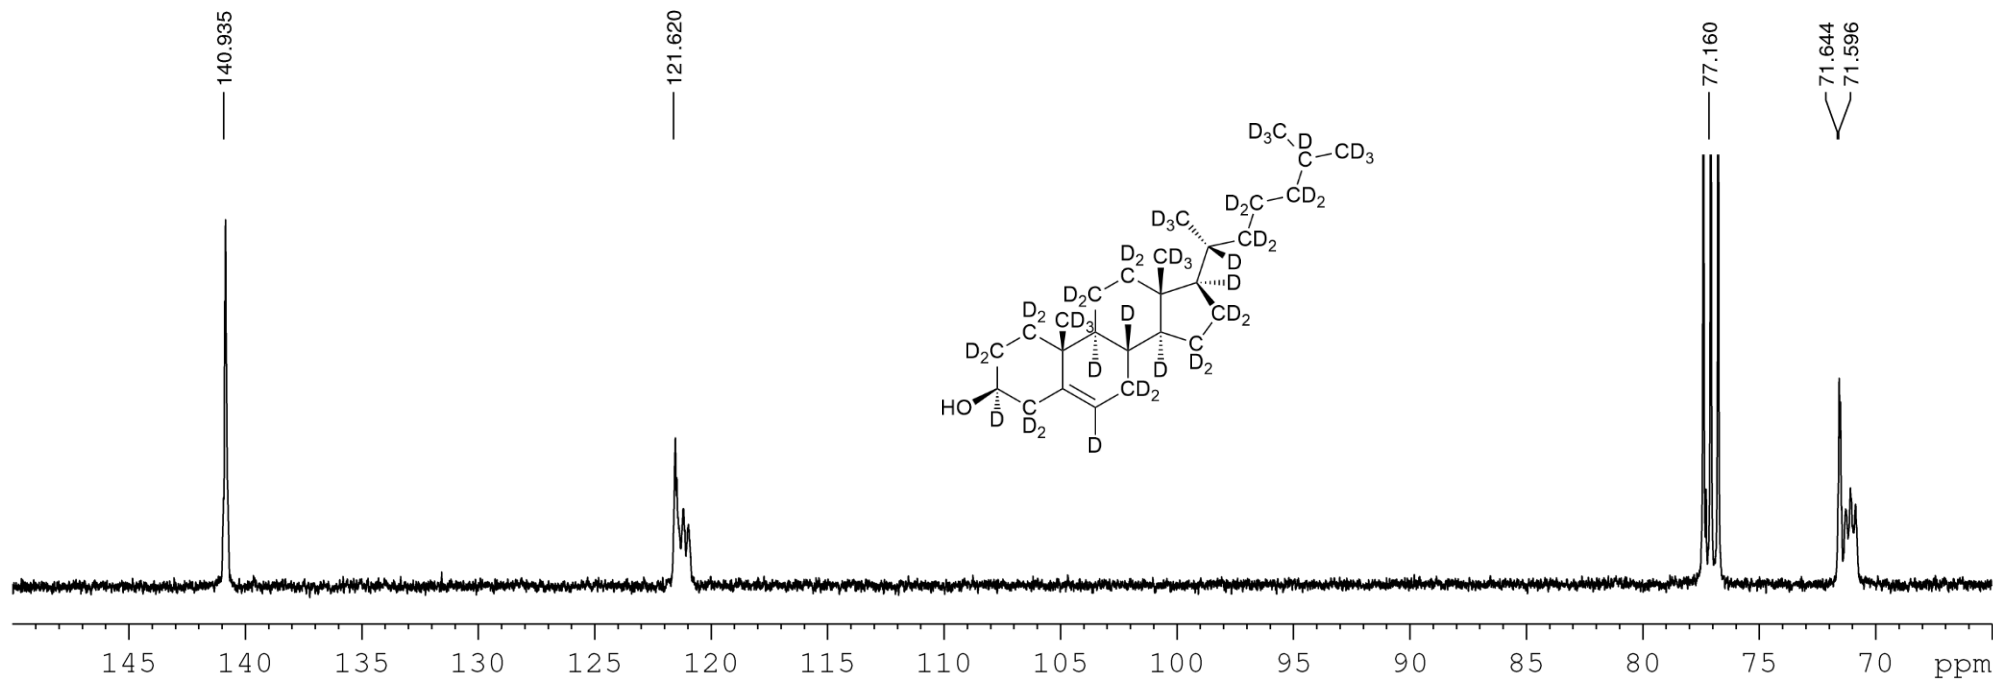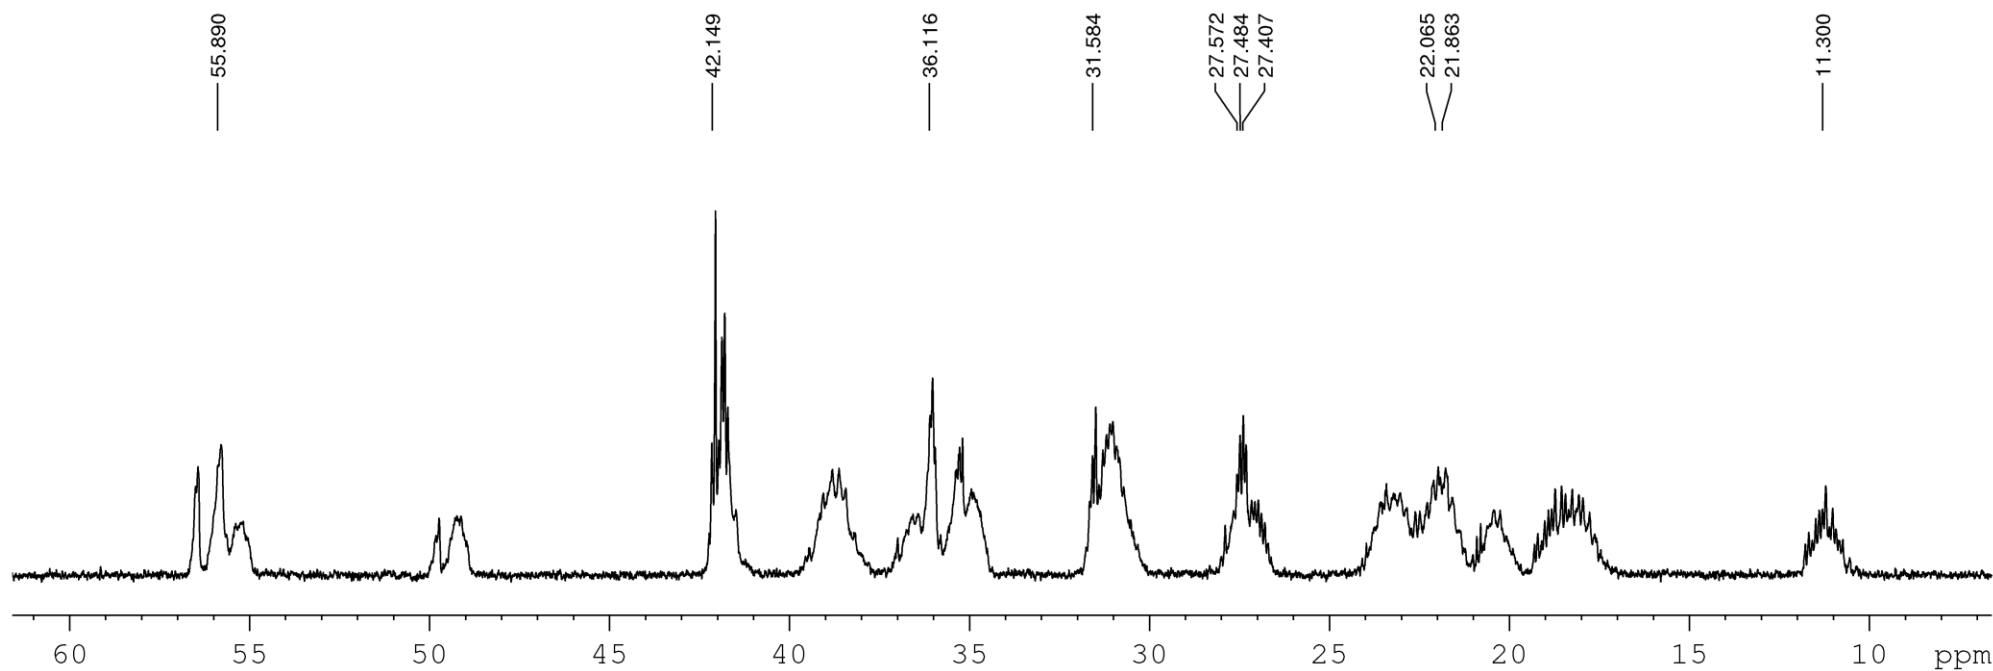

cholesterol-*d*<sub>45</sub> (98%-*d*) <sup>2</sup>H NMR

F2 - Acquisition Parameters  
 Date\_ 20210519  
 Time 8.33 h  
 INSTRUM spect  
 PROBHD Z108618\_0117 (  
 PULPROG zg2h  
 TD 8192  
 SOLVENT CDCl3  
 NS 21  
 DS 0  
 SWH 921.376 Hz  
 FIDRES 0.224945 Hz  
 AQ 4.4455252 sec  
 RG 45.2  
 DW 542.667 usec  
 DE 23.73 usec  
 TE 298.0 K  
 D1 5.00000000 sec  
 D11 0.03000000 sec  
 TD0 1  
 SFO1 61.4226988 MHz  
 NUC1 2H  
 P1 124.00 usec  
 PLW1 29.89100075 W

F2 - Processing parameters  
 SI 16384  
 SF 61.4223931 MHz  
 WDW EM  
 SSB 0  
 LB 0.30 Hz  
 GB 0  
 PC 1.00

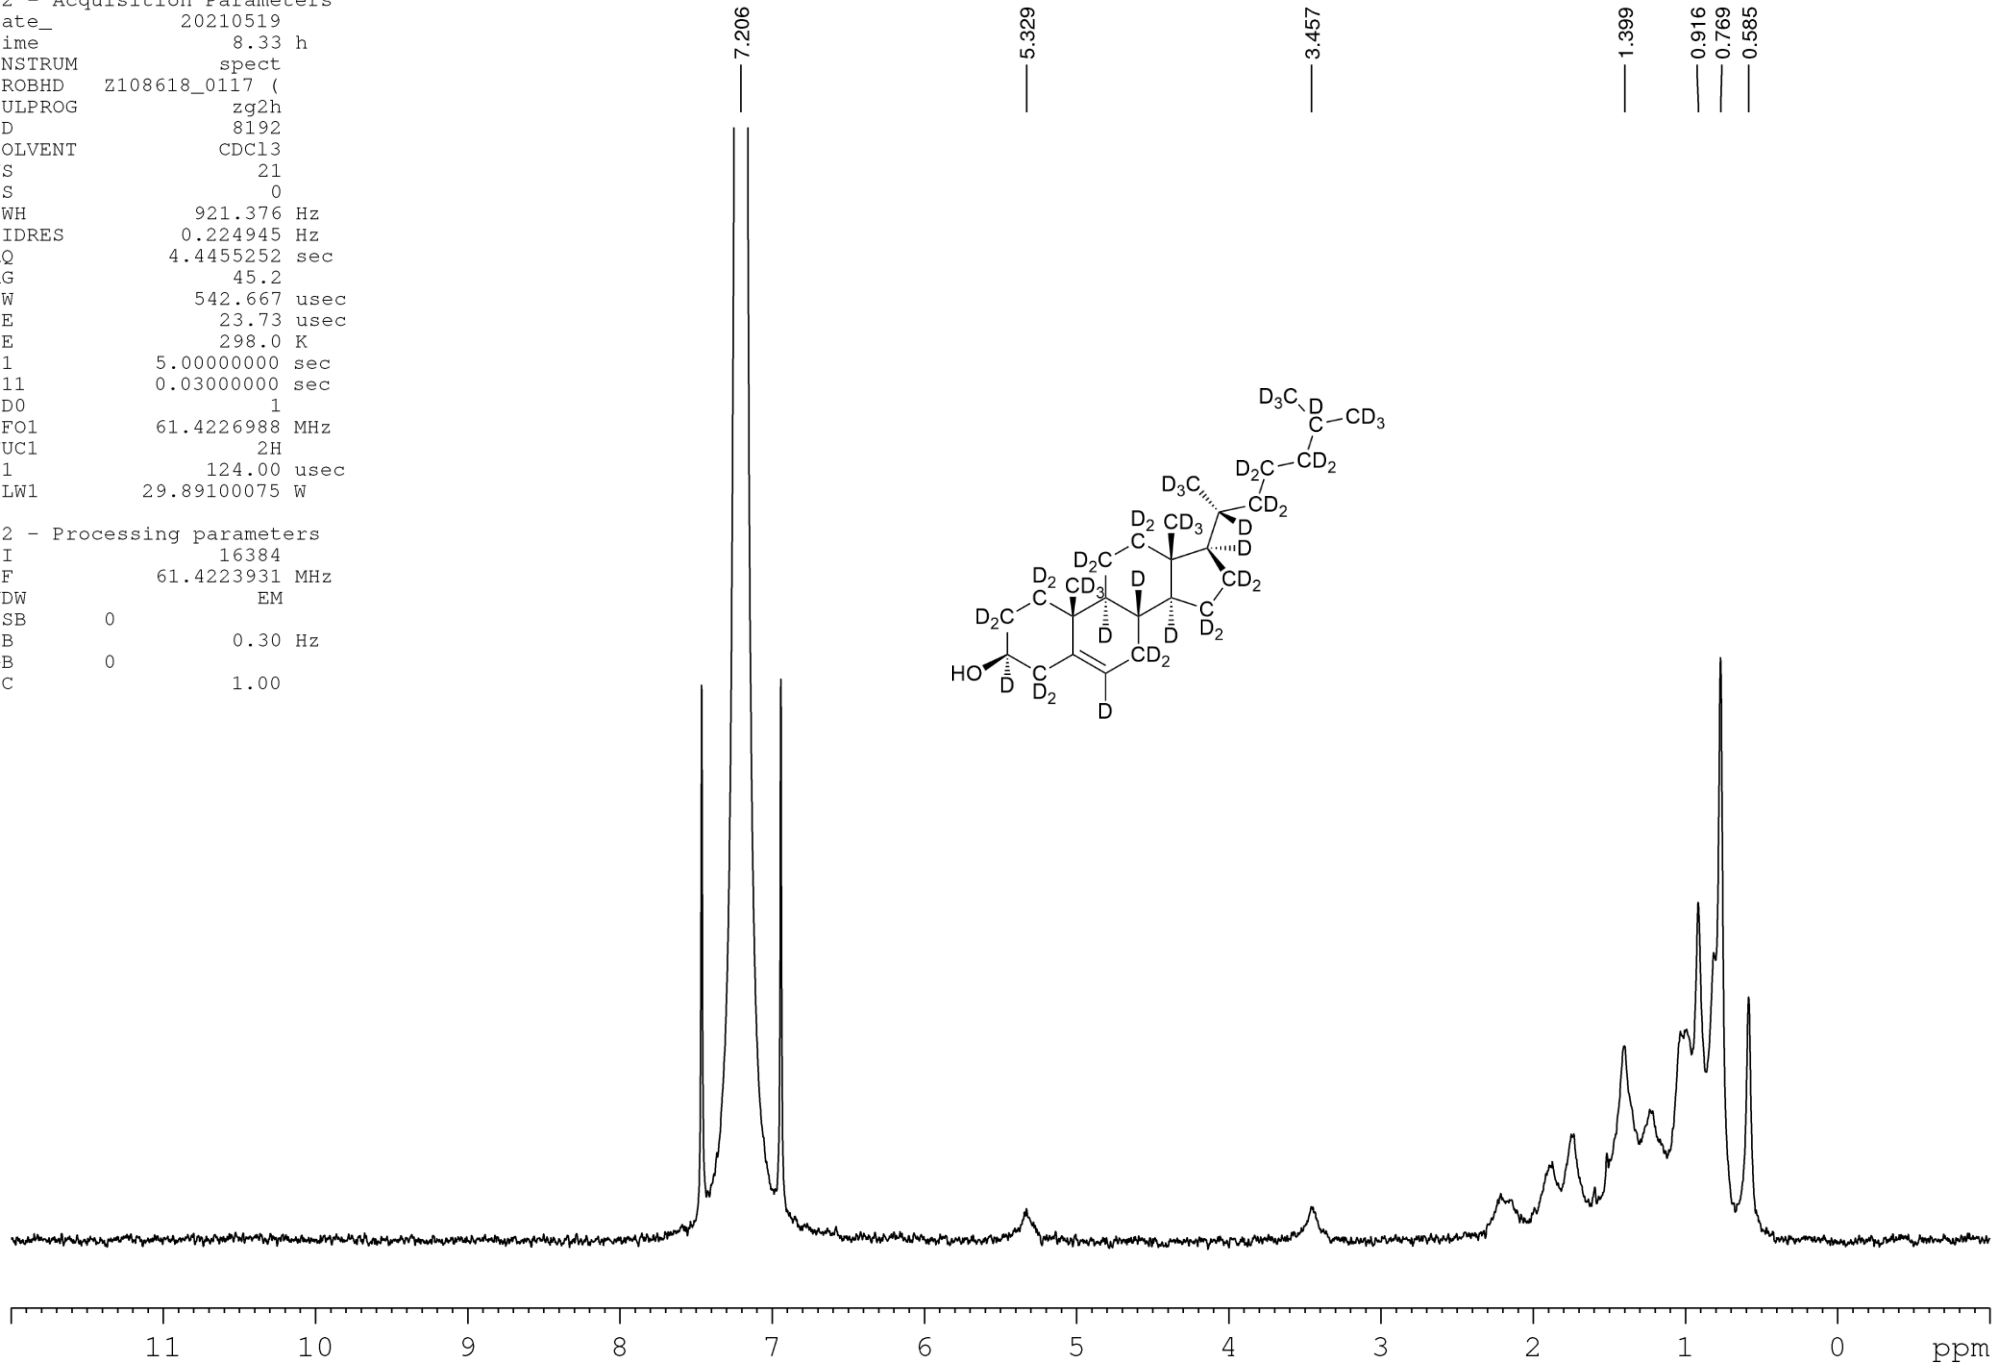

cholesterol-*d*<sub>45</sub> (98%-*d*) <sup>13</sup>C{<sup>1</sup>H,<sup>2</sup>H} NMR

F2 - Acquisition Parameters  
 Date\_ 20210519  
 Time 16.31 h  
 INSTRUM spect  
 PROBHD Z108618\_0117 (  
 PULPROG zgig2h1h  
 TD 65536  
 SOLVENT CDCl3  
 NS 483  
 DS 2  
 SWH 22058.824 Hz  
 FIDRES 0.673182 Hz  
 AQ 1.4854827 sec  
 RG 203  
 DW 22.667 usec  
 DE 6.50 usec  
 TE 298.0 K  
 D1 20.00000000 sec  
 D11 0.03000000 sec  
 D12 0.00002000 sec  
 TD0 1  
 SFO1 100.6223263 MHz  
 NUC1 13C  
 P1 10.00 usec  
 PLW1 84.53199768 W  
 SFO2 400.1322007 MHz  
 NUC2 1H  
 CPDPRG[2] waltz16  
 PCPD2 90.00 usec  
 PLW2 14.03299999 W  
 PLW12 0.38982001 W  
 SFO3 61.4227600 MHz  
 NUC3 2H  
 CPDPRG[3] waltz16  
 PCPD3 375.00 usec  
 PLW3 29.89100075 W  
 PLW17 3.06999993 W

F2 - Processing parameters  
 SI 65536  
 SF 100.6127543 MHz  
 WDW EM  
 SSB 0  
 LB 1.00 Hz  
 GB 0  
 PC 1.40

140.937  
 121.378  
 77.163  
 71.263  
 55.938  
 55.280  
 49.240  
 41.863  
 41.457  
 38.707  
 38.292  
 36.321  
 36.081  
 35.063  
 34.808  
 31.169  
 30.973  
 30.692  
 27.292  
 26.953  
 23.386  
 22.716  
 21.777  
 21.521  
 20.211  
 18.556  
 17.765  
 11.044

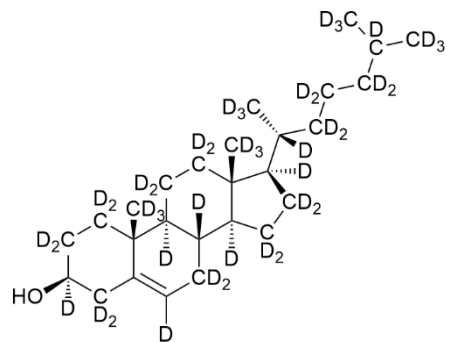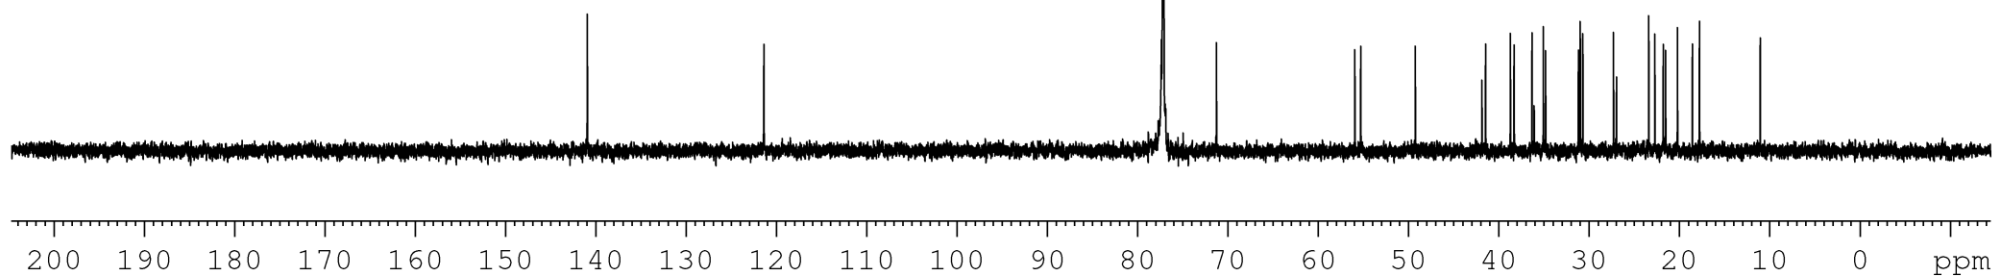

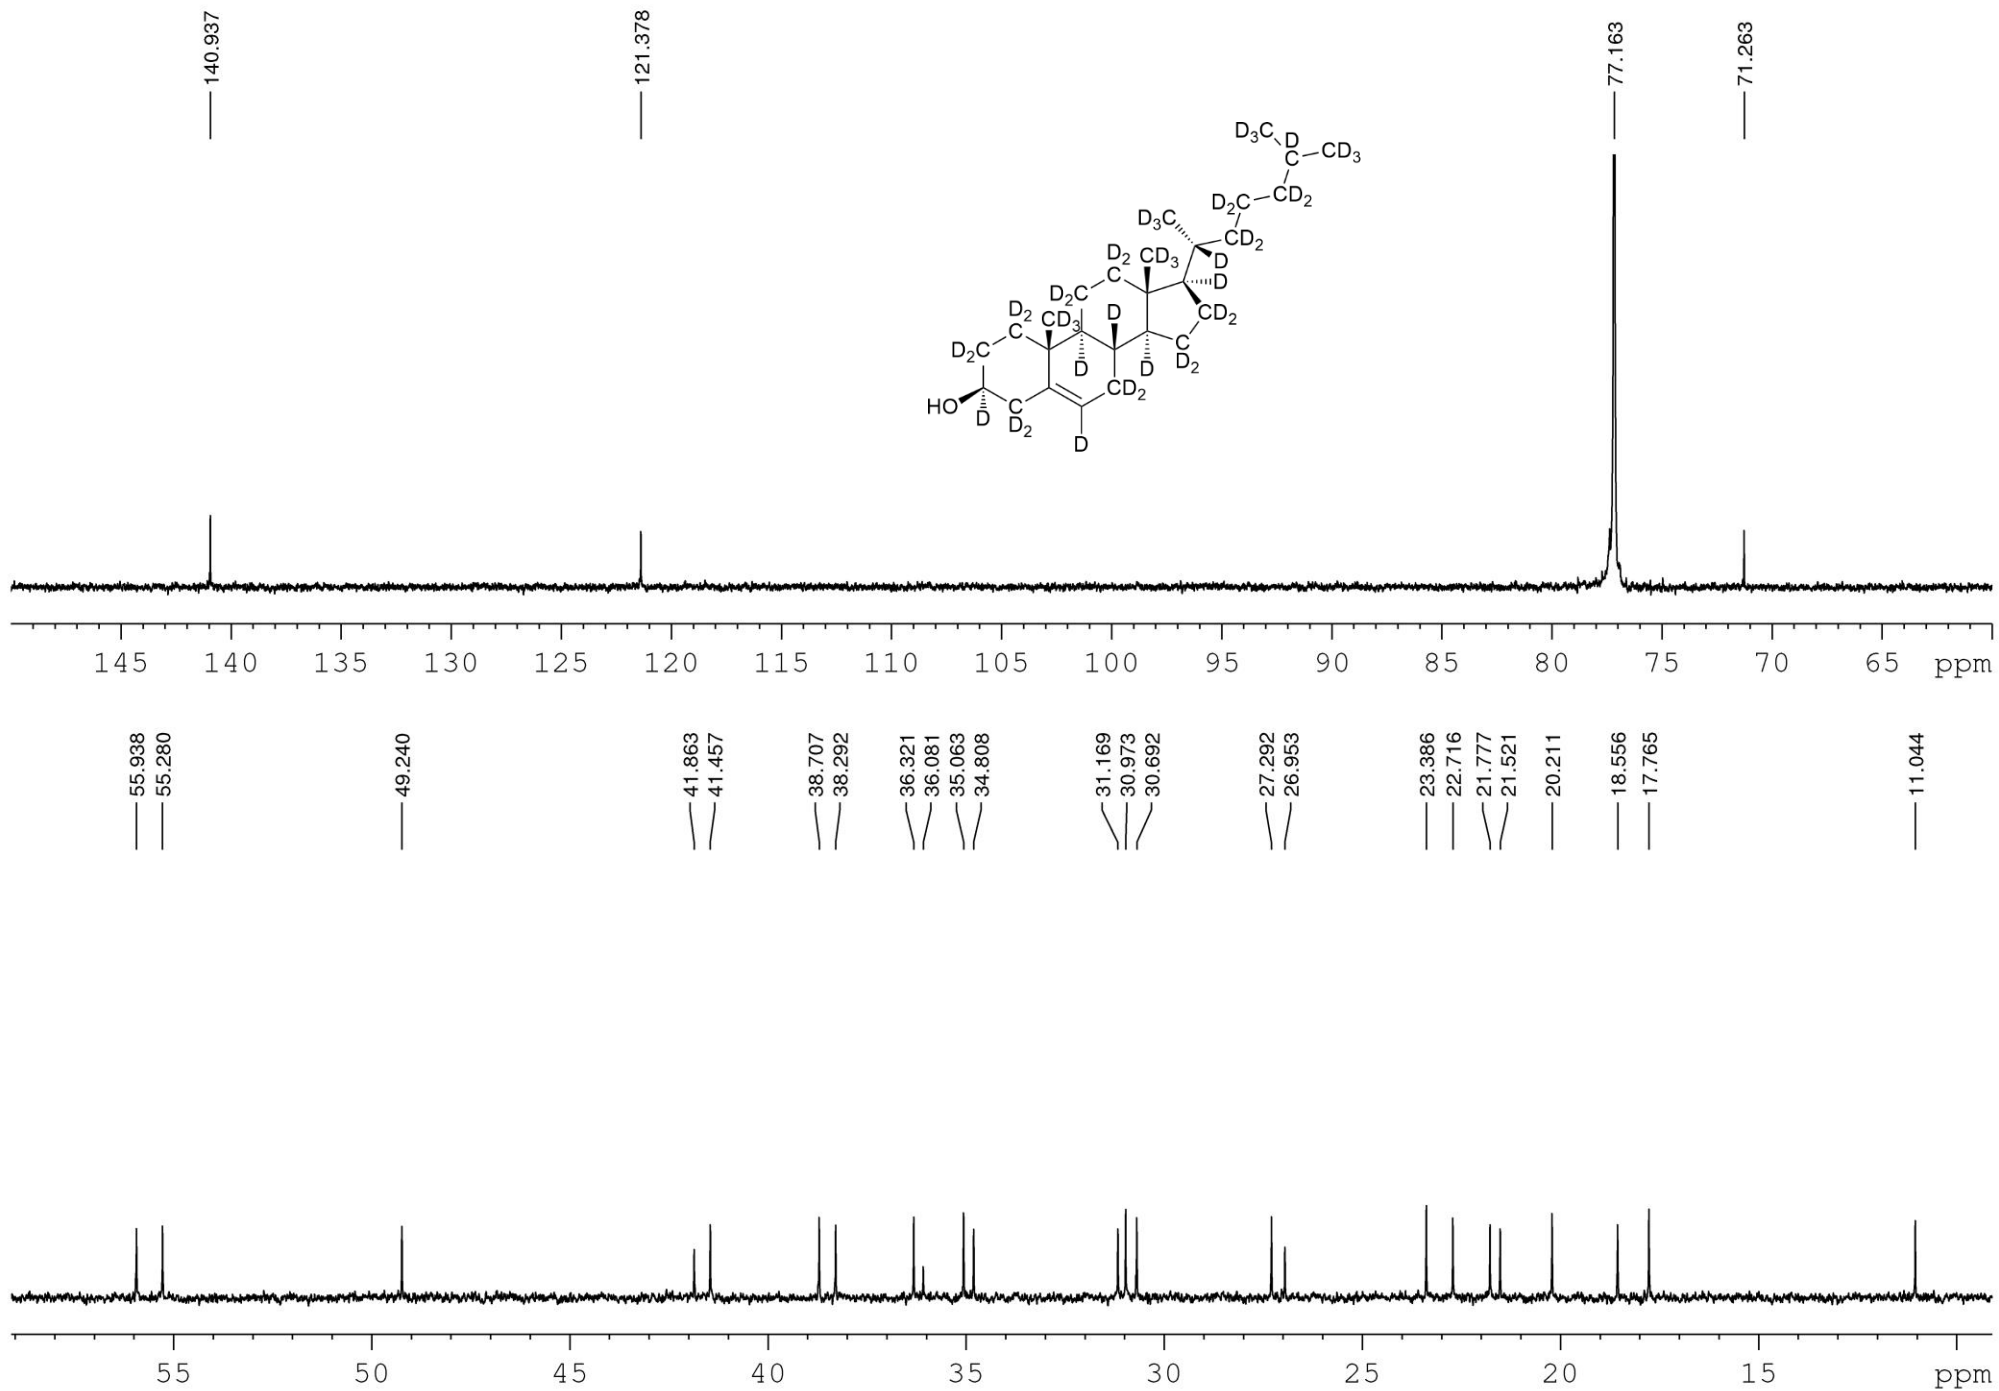



cholesterol-*d*<sub>45</sub> (98%-*d*) <sup>13</sup>C{<sup>1</sup>H} NMR

F2 - Acquisition Parameters  
 Date\_ 20210521  
 Time 11.12 h  
 INSTRUM spect  
 PROBHD z108618\_0117 (  
 PULPROG zgpg30  
 TD 65536  
 SOLVENT CDCl3  
 NS 3000  
 DS 4  
 SWH 22058.824 Hz  
 FIDRES 0.673182 Hz  
 AQ 1.4854827 sec  
 RG 203  
 DW 22.667 usec  
 DE 8.02 usec  
 TE 298.0 K  
 D1 2.00000000 sec  
 D11 0.03000000 sec  
 TD0 1  
 SFO1 100.6223248 MHz  
 NUC1 13C  
 P1 10.00 usec  
 PLW1 84.53199768 W  
 SFO2 400.1320007 MHz  
 NUC2 1H  
 CPDPRG[2] waltz16  
 PCPD2 90.00 usec  
 PLW2 14.03299999 W  
 PLW12 0.38982001 W  
 PLW13 0.19607000 W

F2 - Processing parameters  
 SI 65536  
 SF 100.6127546 MHz  
 WDW EM  
 SSB 0  
 LB 1.00 Hz  
 GB 0  
 PC 1.40

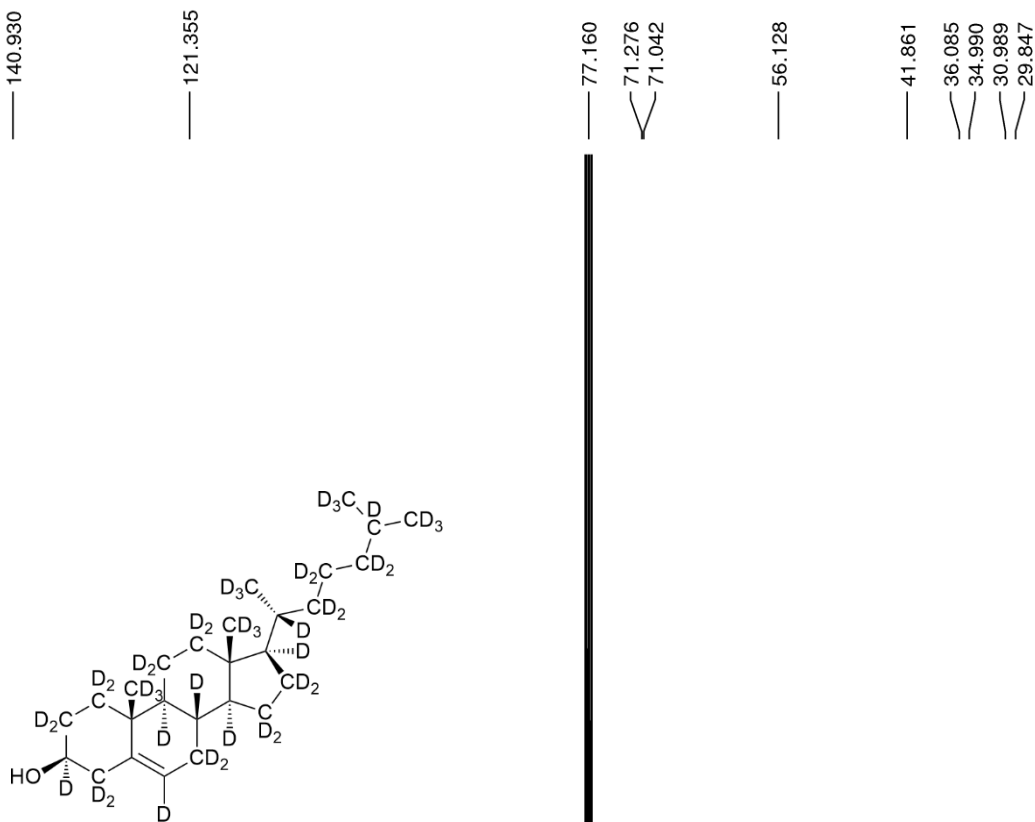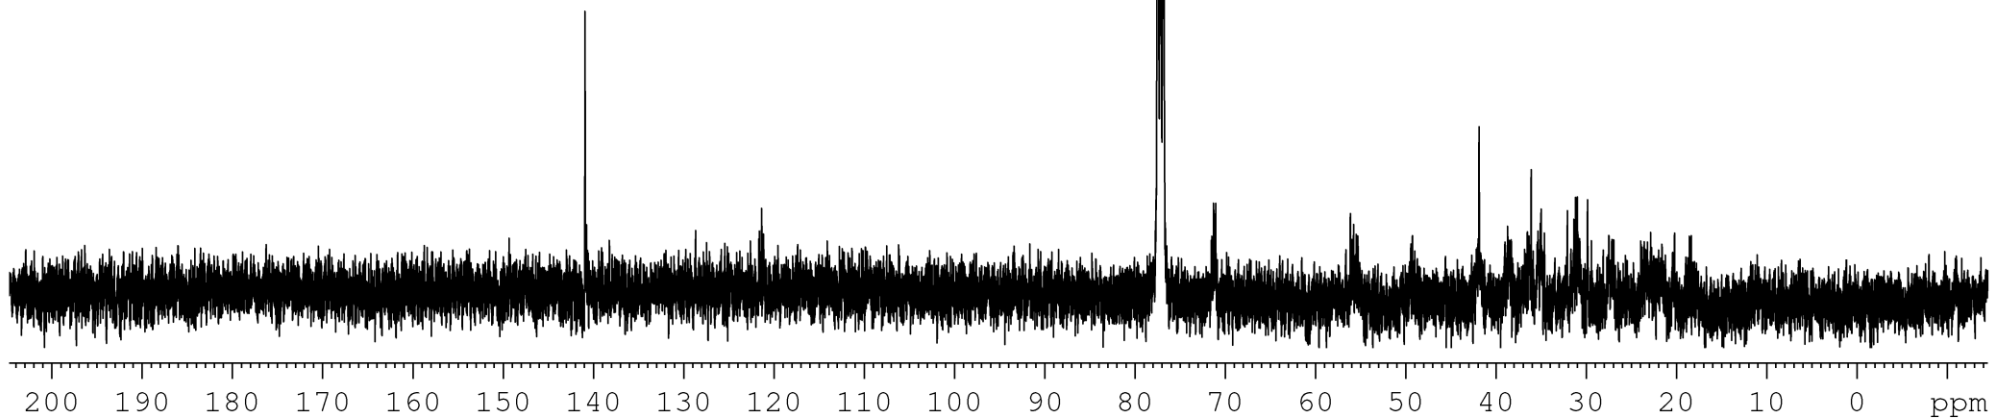

## F2 - Acquisition Parameters

Date\_ 20230214  
Time 12.20 h  
INSTRUM spect  
PROBHD Z108618\_0117 (  
PULPROG zg  
TD 120046  
SOLVENT CDCl3  
NS 8  
DS 0  
SWH 6002.401 Hz  
FIDRES 0.100002 Hz  
AQ 9.9998322 sec  
RG 28.5  
DW 83.300 usec  
DE 16.70 usec  
TE 298.0 K  
D1 10.00000000 sec  
TDO 1  
SFO1 400.1320007 MHz  
NUC1 1H  
P1 15.00 usec  
PLW1 14.03299999 W

## F2 - Processing parameters

SI 32768  
SF 400.1300090 MHz  
WDW no  
SSB 0  
LB 0 Hz  
GB 0  
PC 1.00

7.263

5.308

3.467

2.237  
2.1441.609  
1.529

1.263

0.896  
0.748  
0.628

0.062

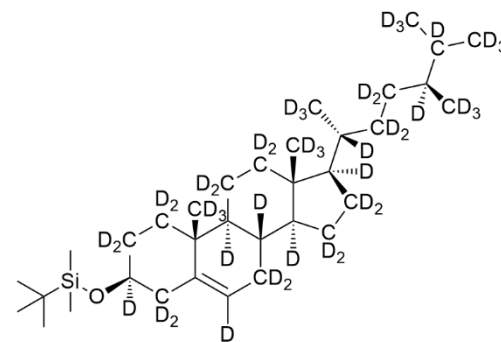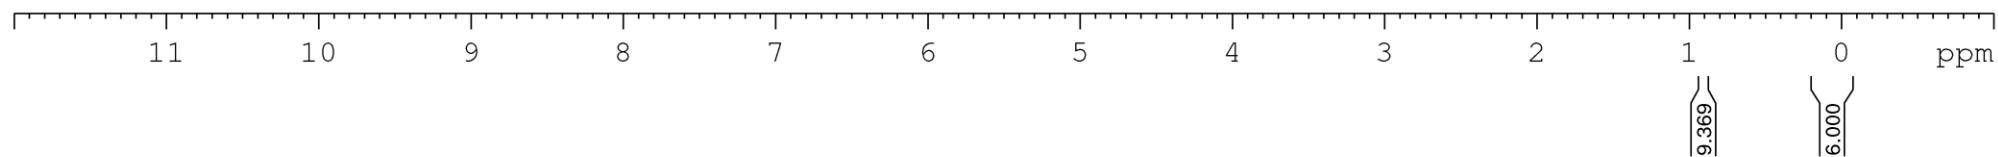

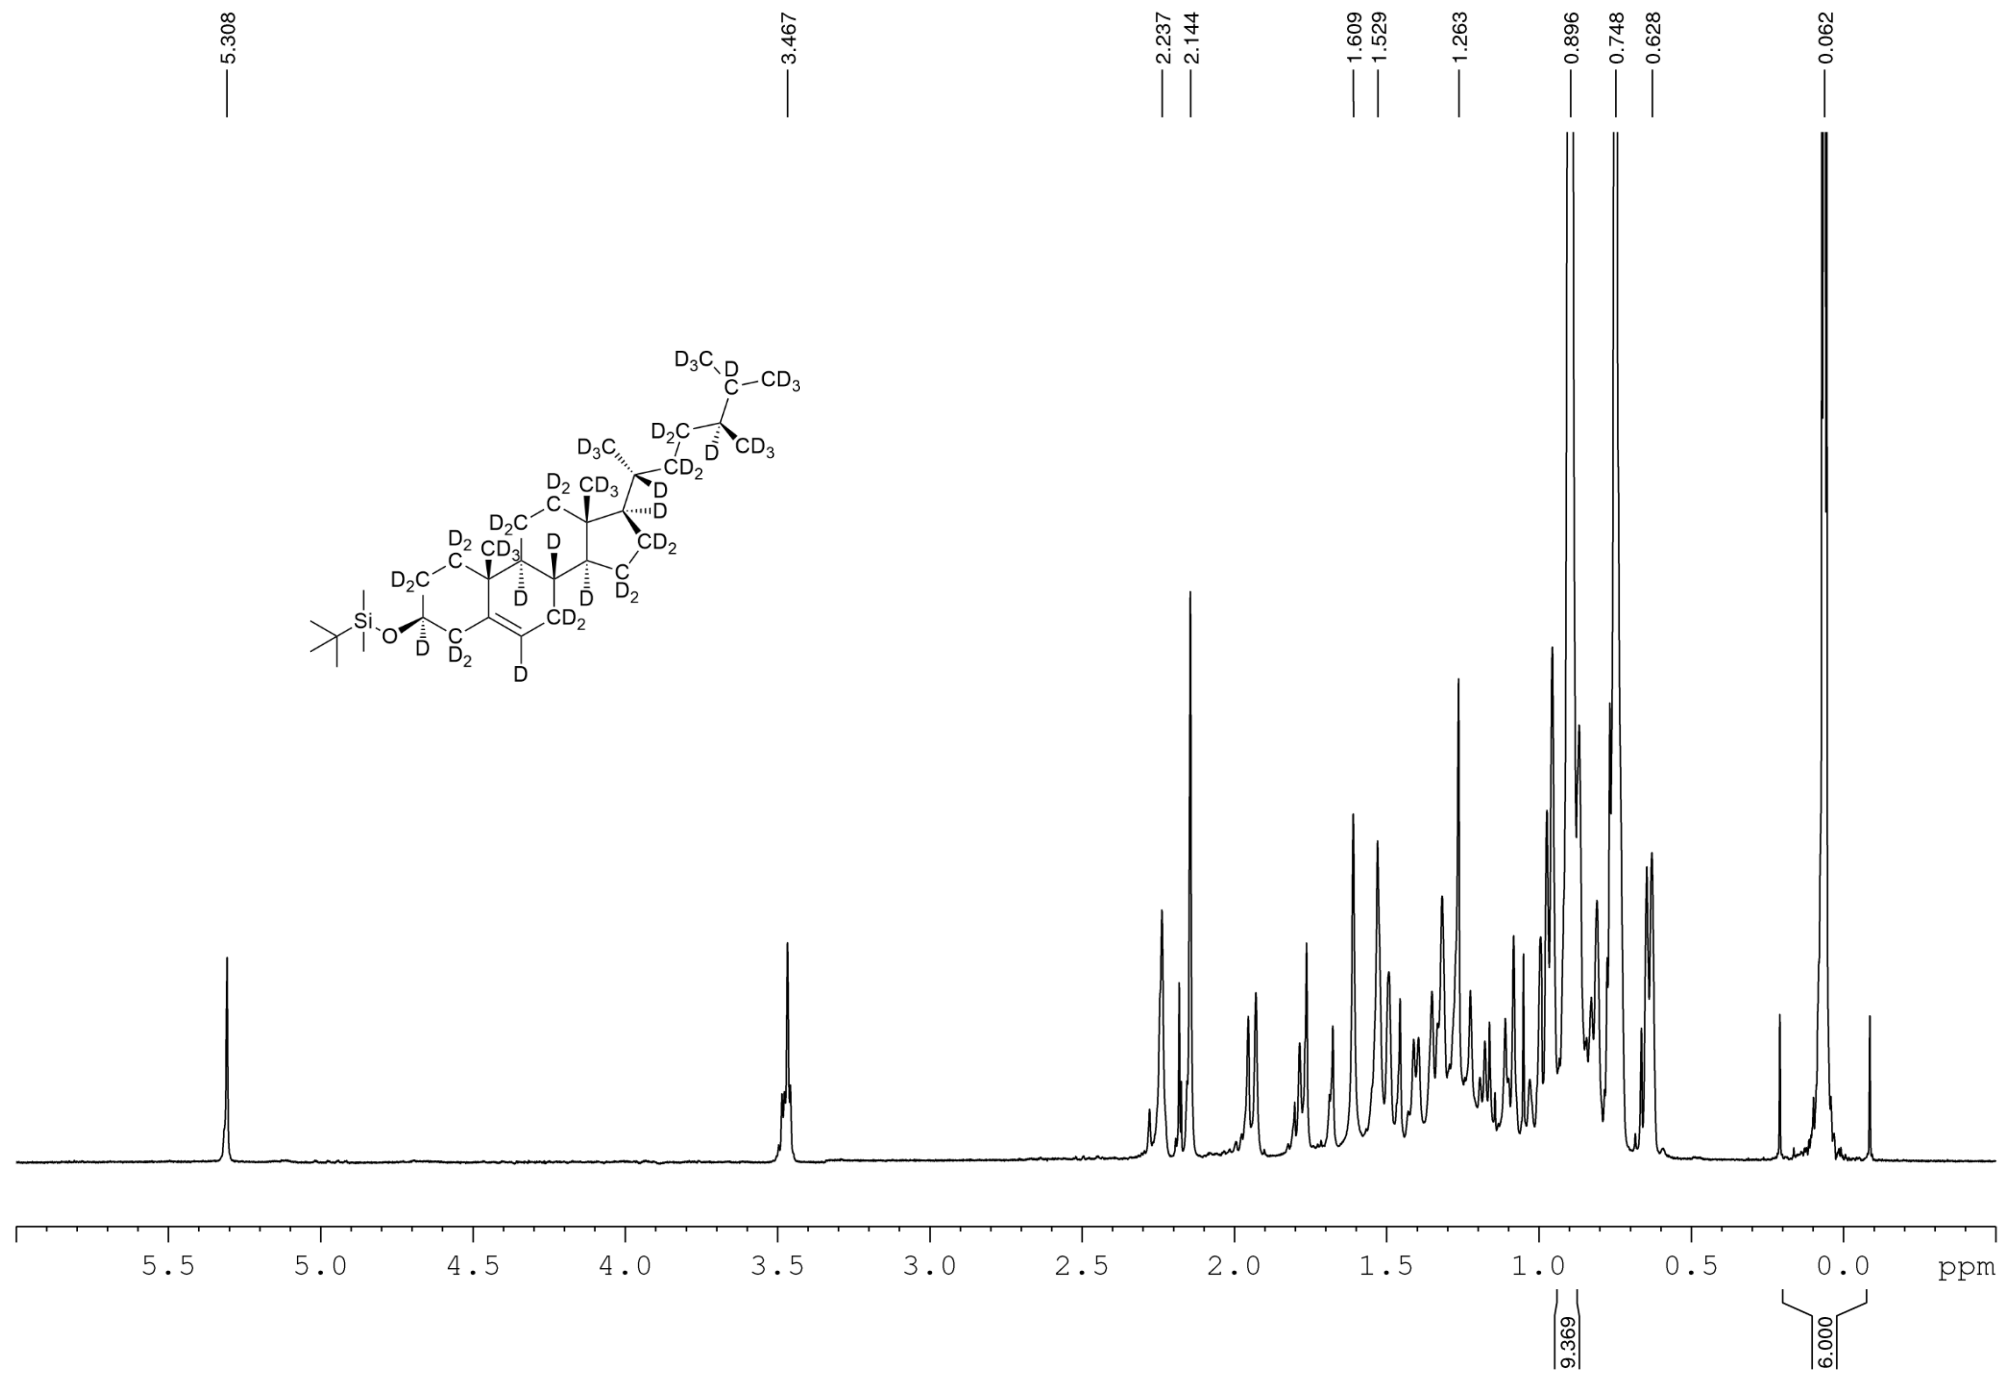

## F2 - Acquisition Parameters

Date\_ 20230214  
Time 12.25 h  
INSTRUM spect  
PROBHD Z108618\_0117 (  
PULPROG zg2h  
TD 8192  
SOLVENT CDCl3  
NS 21  
DS 0  
SWH 921.376 Hz  
FIDRES 0.224945 Hz  
AQ 4.4455252 sec  
RG 45.2  
DW 542.667 usec  
DE 23.73 usec  
TE 297.9 K  
D1 5.00000000 sec  
D11 0.03000000 sec  
TD0 1  
SFO1 61.4226988 MHz  
NUC1 2H  
P1 124.00 usec  
PLW1 29.89100075 W

## F2 - Processing parameters

SI 16384  
SF 61.4223932 MHz  
WDW EM  
SSB 0  
LB 0.30 Hz  
GB 0  
PC 1.00

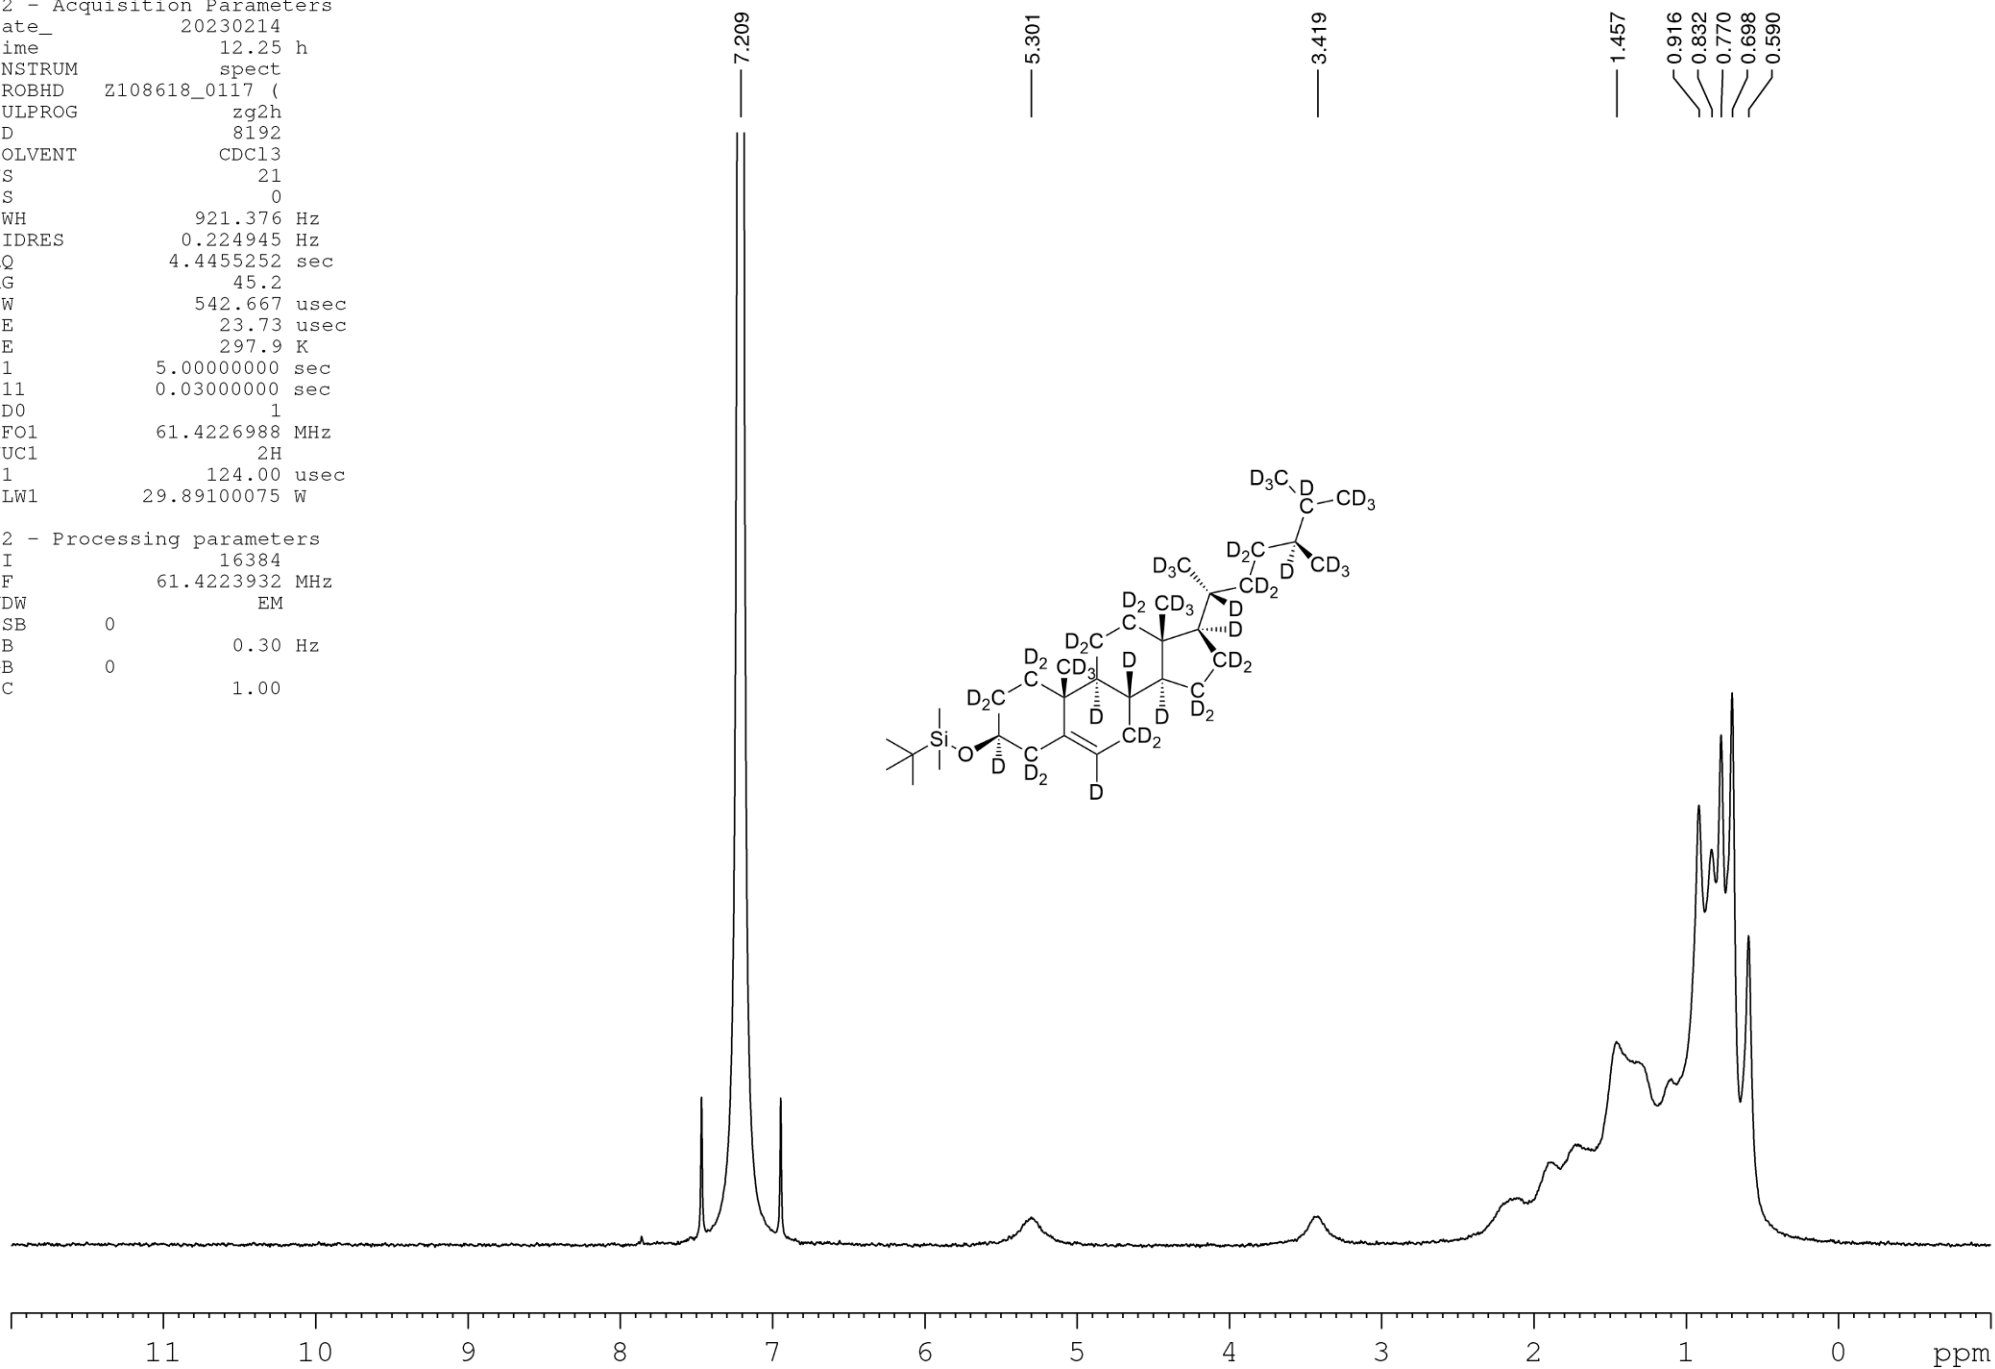

## F2 - Acquisition Parameters

Date\_ 20230215  
 Time 11.18 h  
 INSTRUM spect  
 PROBHD z108618\_0117 (  
 PULPROG zgig2h1h  
 TD 65536  
 SOLVENT CDC13  
 NS 2932  
 DS 0  
 SWH 22058.824 Hz  
 FIDRES 0.673182 Hz  
 AQ 1.4854827 sec  
 RG 203  
 DW 22.667 usec  
 DE 6.50 usec  
 TE 298.1 K  
 D1 20.00000000 sec  
 D11 0.03000000 sec  
 D12 0.00002000 sec  
 TD0 1  
 SFO1 100.6223263 MHz  
 NUC1 13C  
 P1 10.00 usec  
 PLW1 84.53199768 W  
 SFO2 400.1322007 MHz  
 NUC2 1H  
 CPDPRG[2] waltz16  
 PCPD2 90.00 usec  
 PLW2 14.03299999 W  
 PLW12 0.38982001 W  
 SFO3 61.4227600 MHz  
 NUC3 2H  
 CPDPRG[3] waltz16  
 PCPD3 375.00 usec  
 PLW3 29.89100075 W  
 PLW17 3.06999993 W

## F2 - Processing parameters

SI 65536  
 SF 100.6127540 MHz  
 WDW EM  
 SSB 0  
 LB 1.00 Hz  
 GB 0  
 PC 1.40

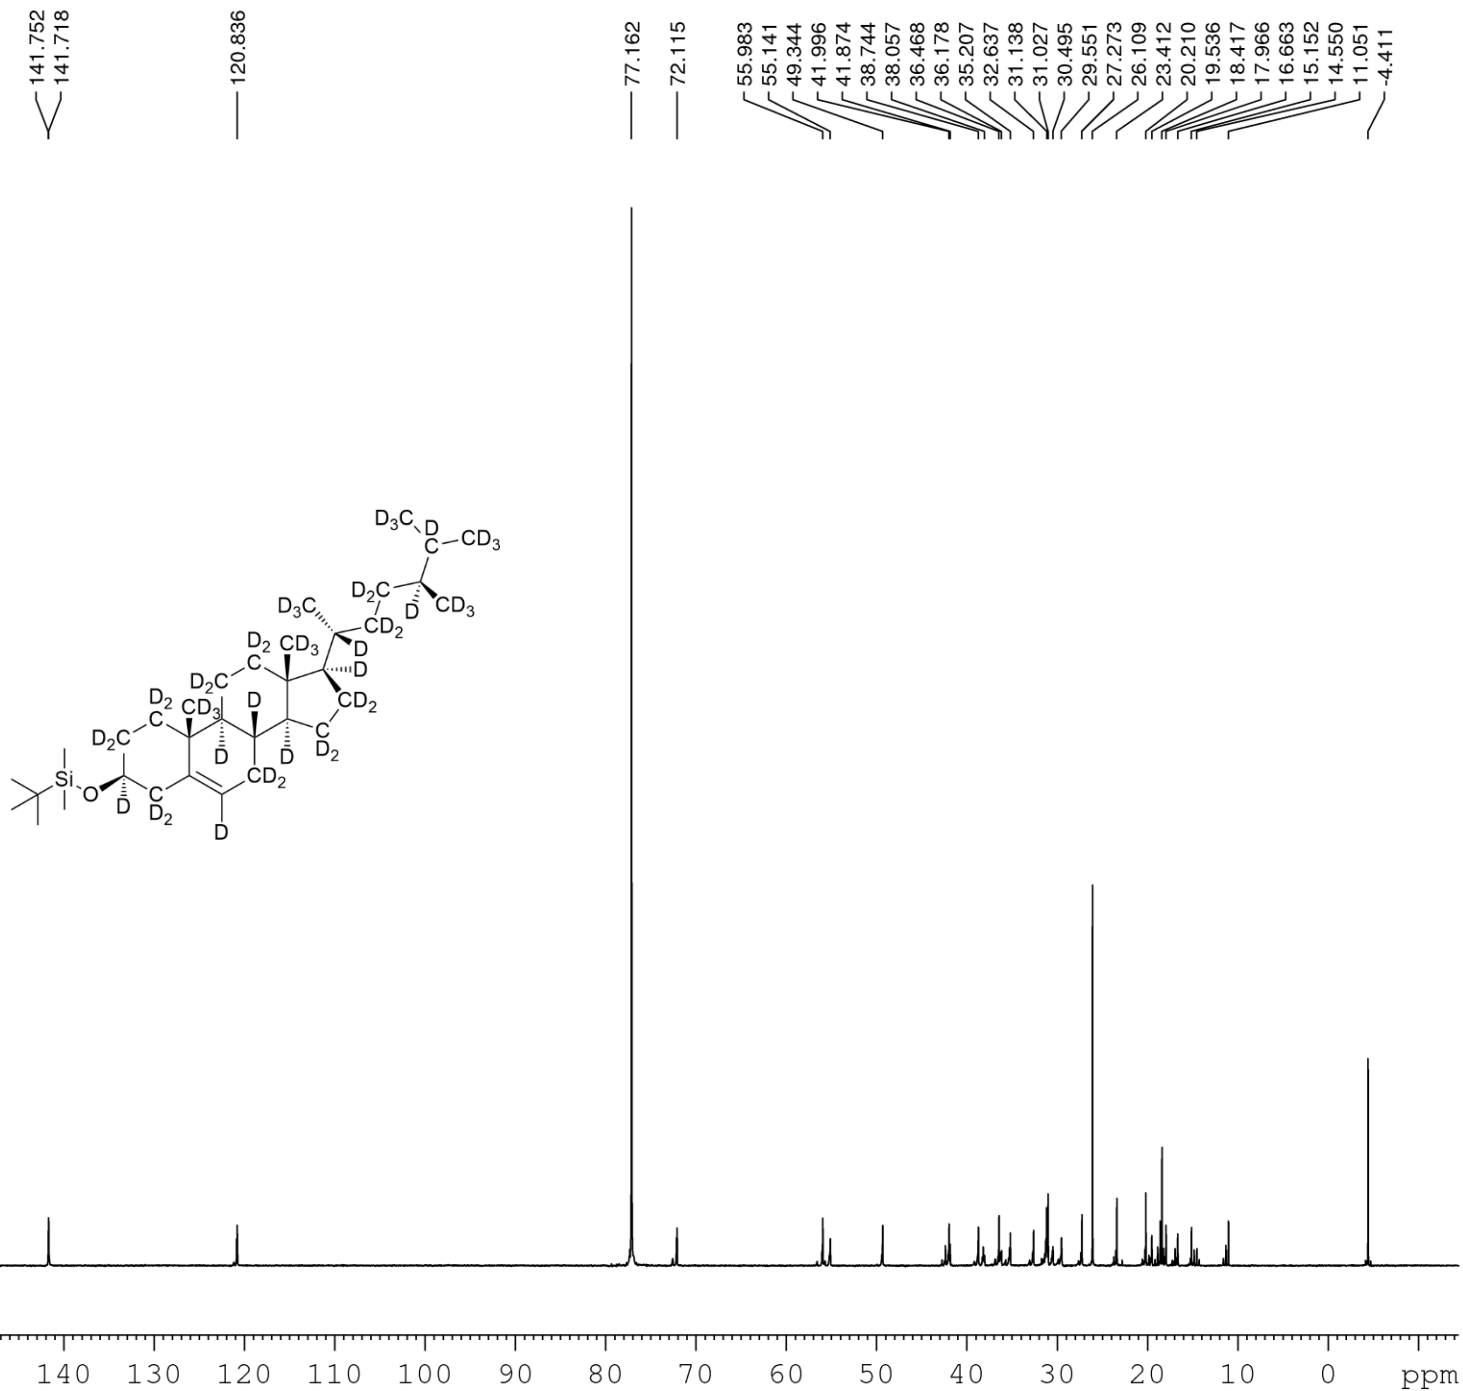

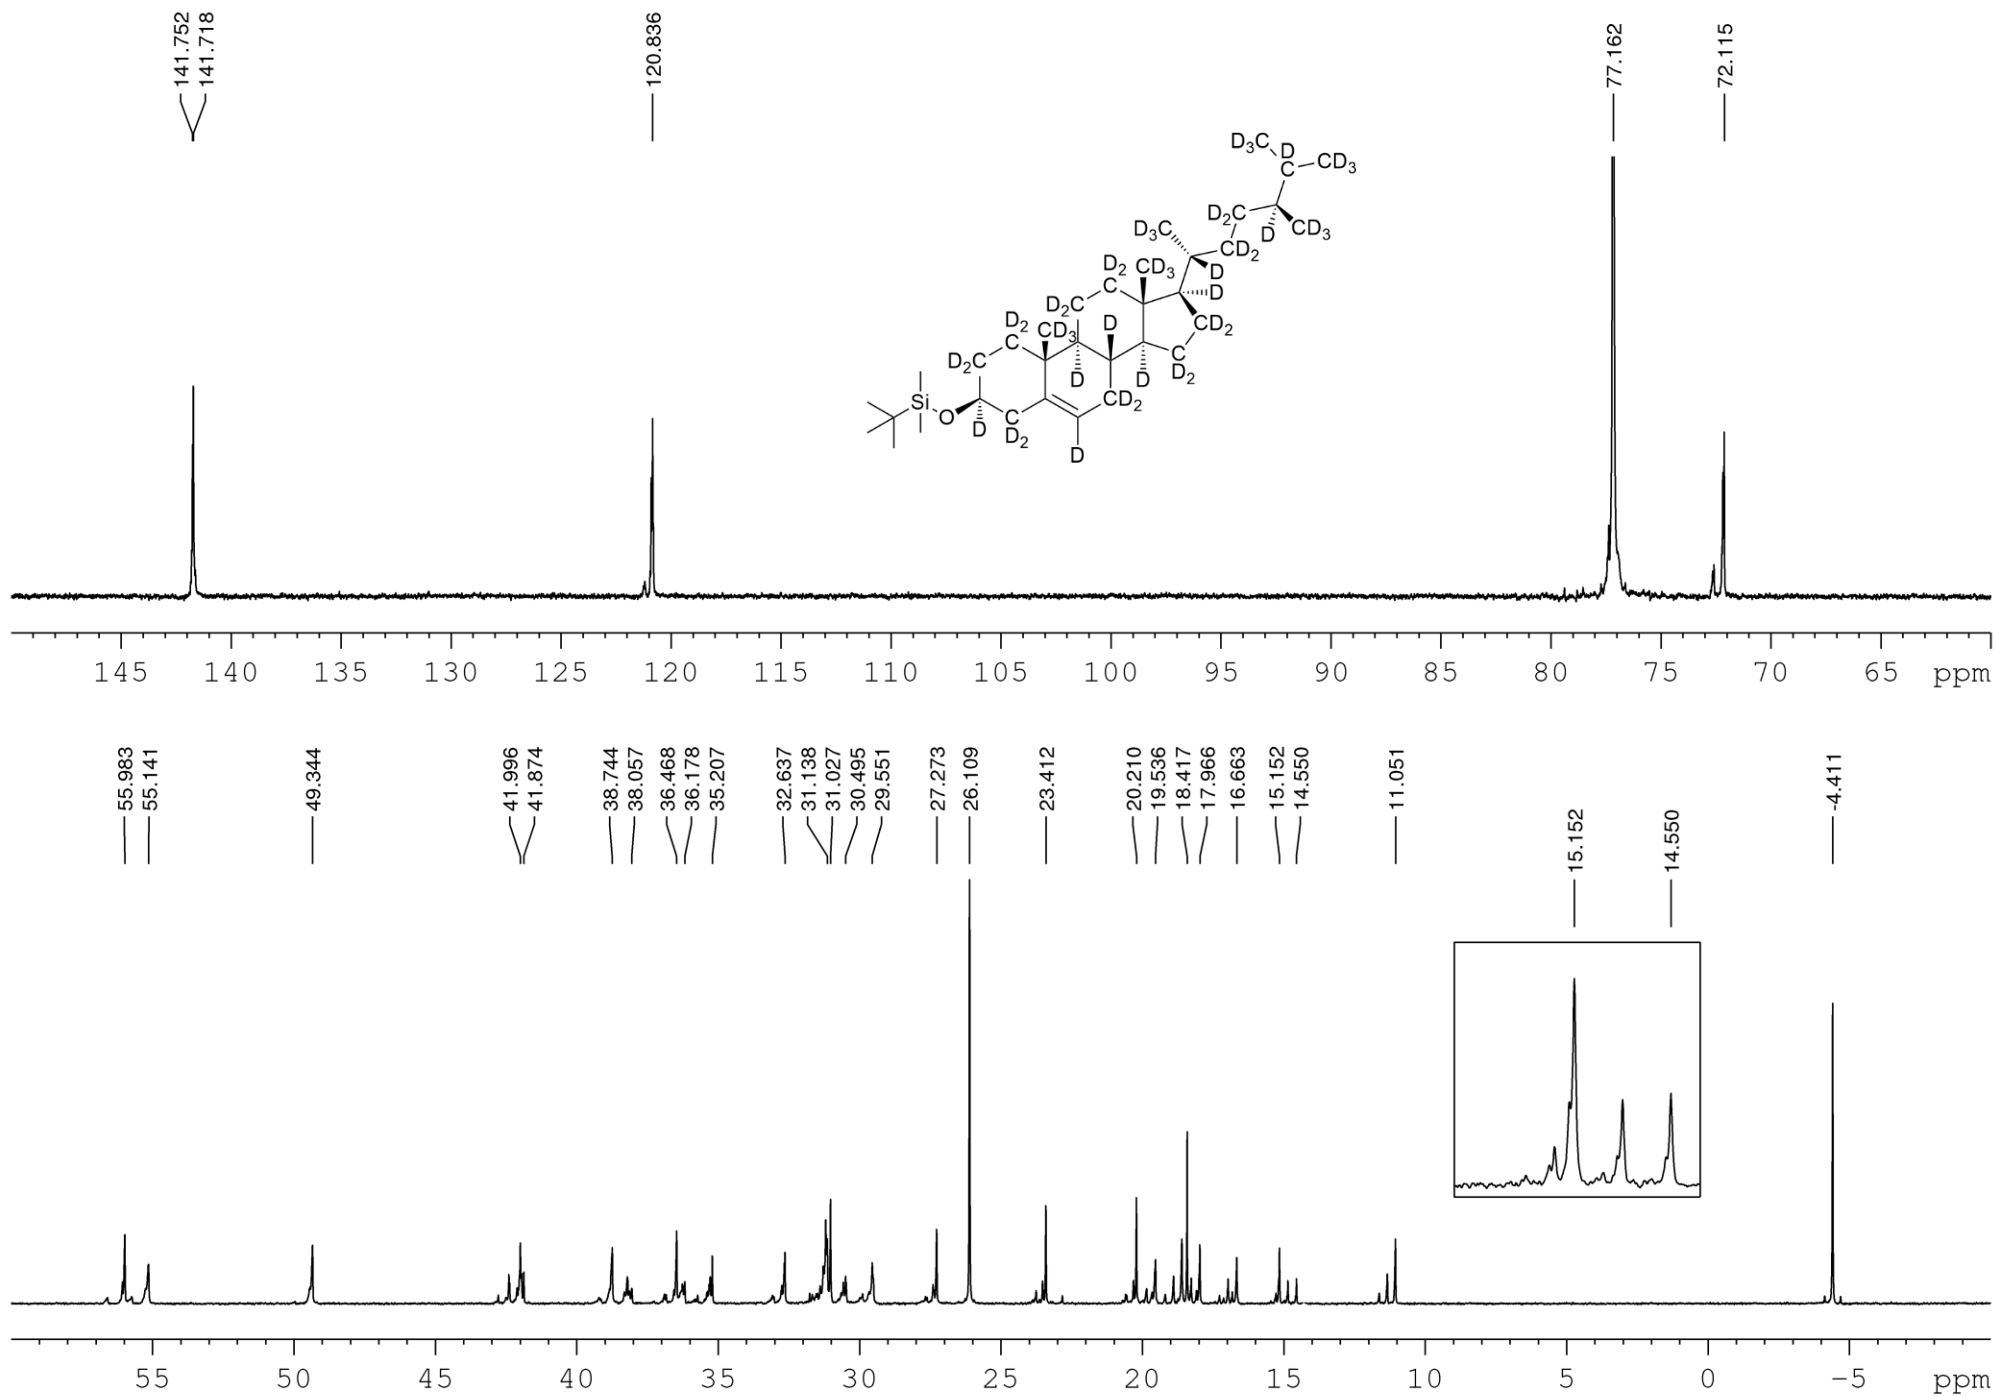

## F2 - Acquisition Parameters

Date\_ 20230214  
Time 13.42 h  
INSTRUM spect  
PROBHD Z108618\_0117 (  
PULPROG zgpg30  
TD 65536  
SOLVENT CDCl3  
NS 1284  
DS 0  
SWH 22058.824 Hz  
FIDRES 0.673182 Hz  
AQ 1.4854827 sec  
RG 203  
DW 22.667 usec  
DE 8.02 usec  
TE 298.0 K  
D1 2.00000000 sec  
D11 0.03000000 sec  
TD0 1  
SFO1 100.6223248 MHz  
NUC1 13C  
P1 10.00 usec  
PLW1 84.53199768 W  
SFO2 400.1320007 MHz  
NUC2 1H  
CPDPRG[2] waltz16  
PCPD2 90.00 usec  
PLW2 14.03299999 W  
PLW12 0.38982001 W  
PLW13 0.19607000 W

## F2 - Processing parameters

SI 65536  
SF 100.6127540 MHz  
WDW EM  
SSB 0  
LB 1.00 Hz  
GB 0  
PC 1.40

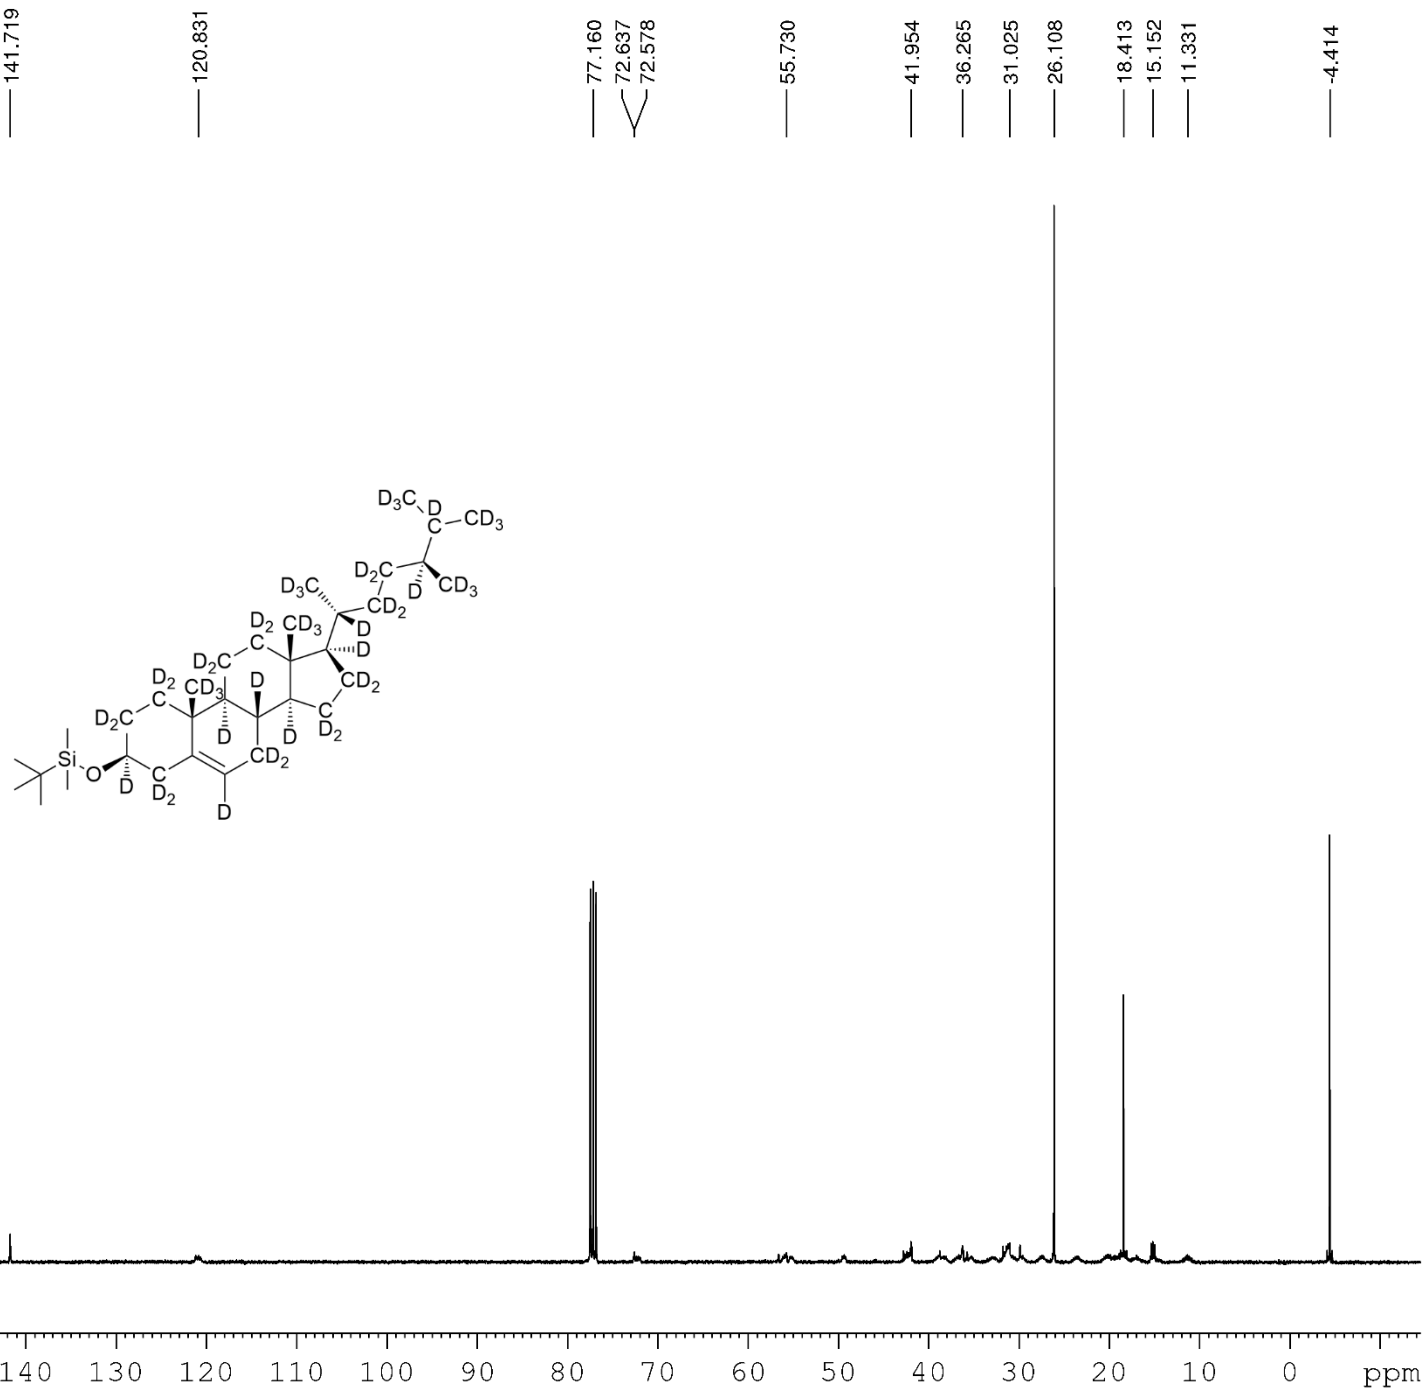

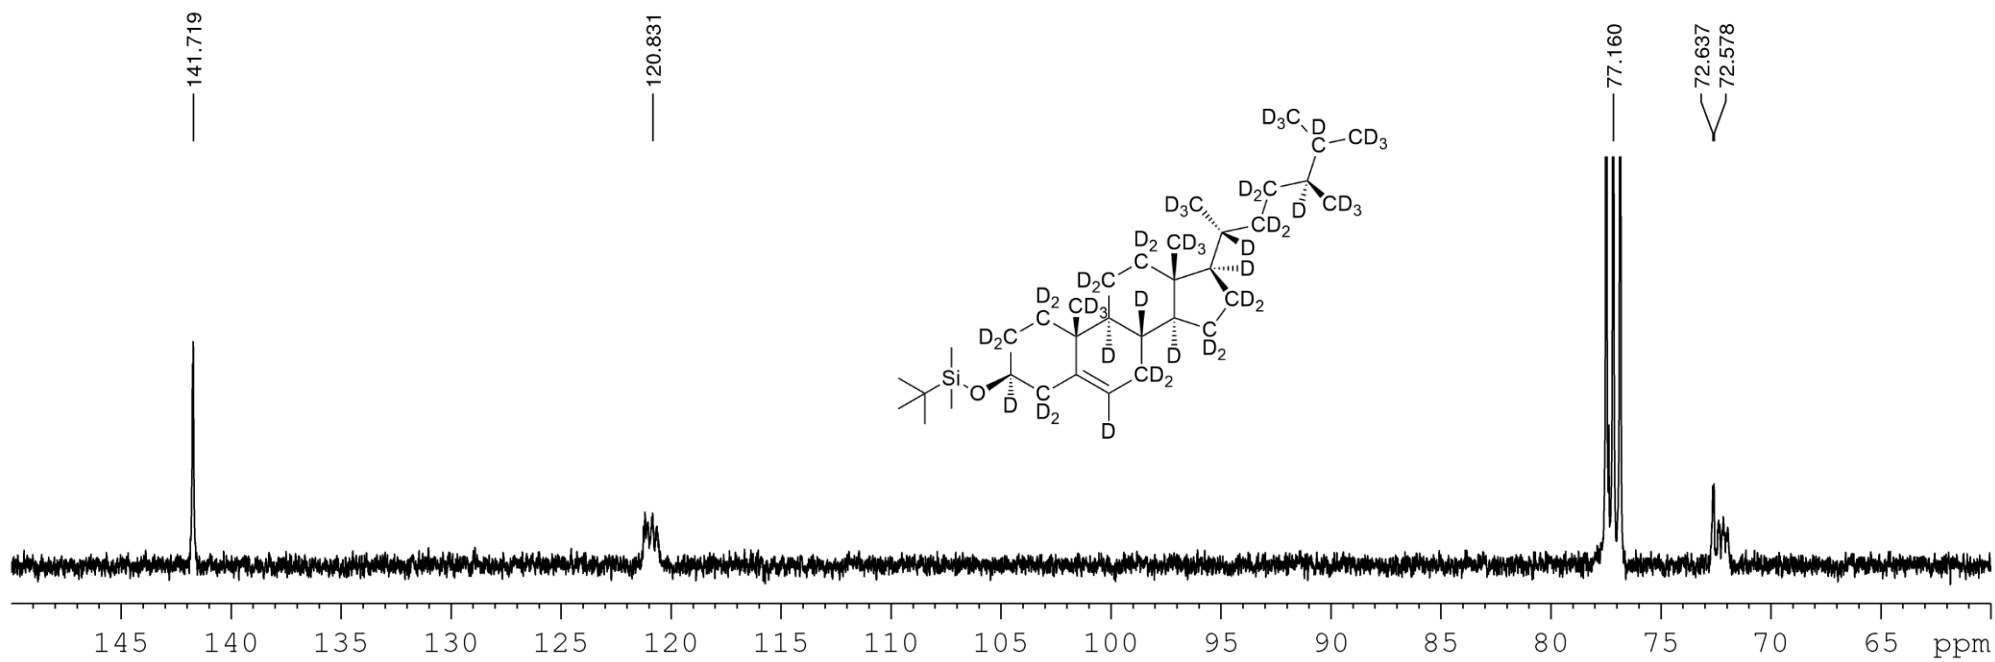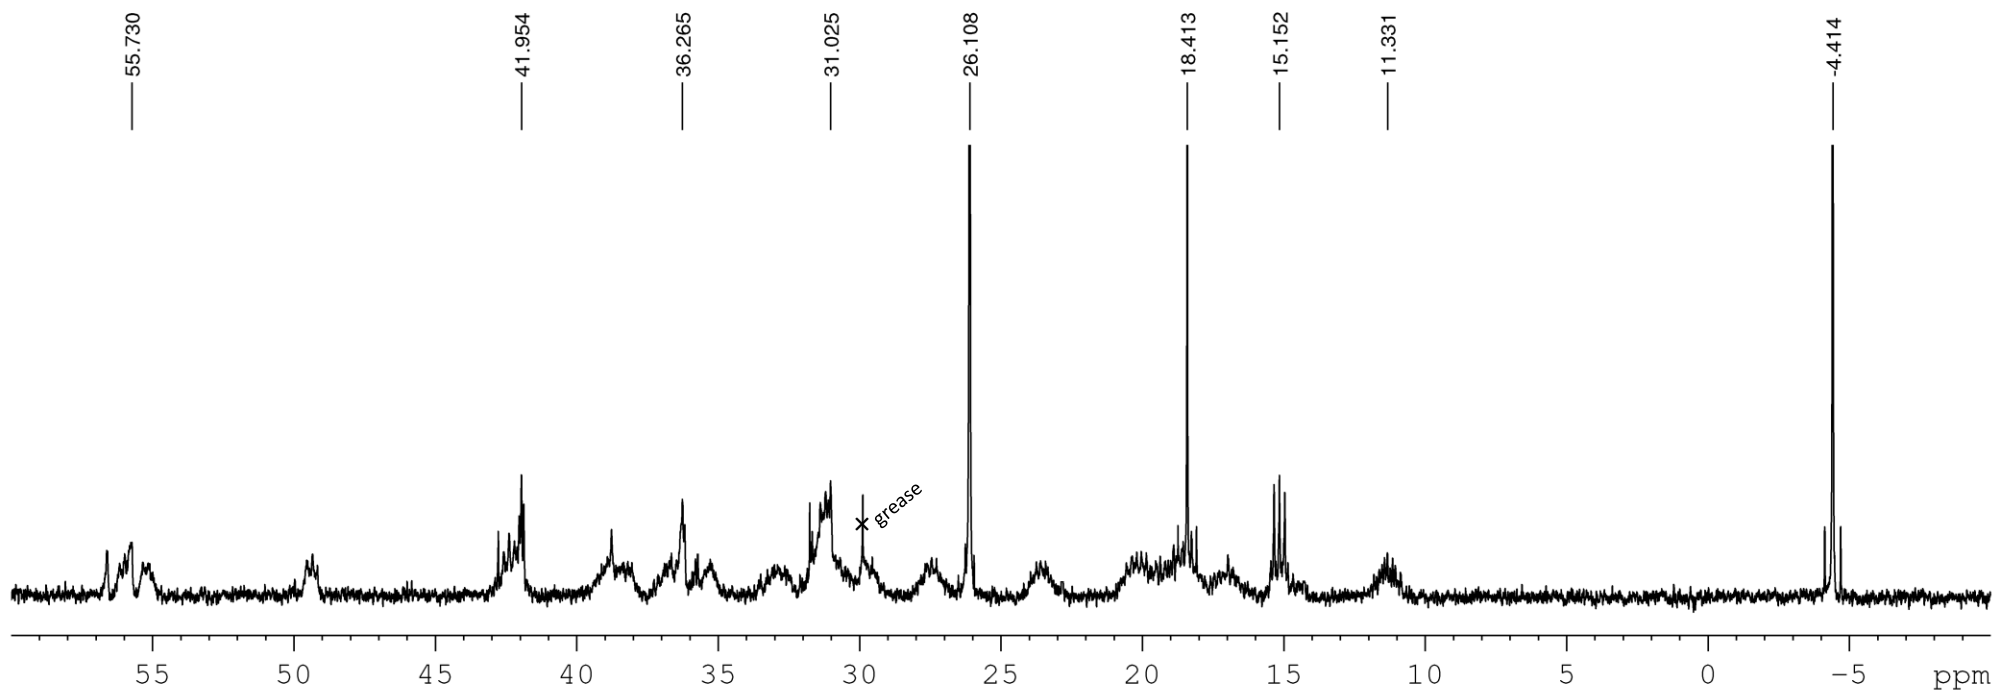



Current Data Parameters  
 NAME CRI02051  
 EXPNO 29  
 PROCNO 1

## F2 - Acquisition Parameters

Date\_ 20230216  
 Time 17.50 h  
 INSTRUM spect  
 PROBHD Z108618\_0117 (  
 PULPROG zg  
 TD 120046  
 SOLVENT CDCl3  
 NS 8  
 DS 0  
 SWH 6002.401 Hz  
 FIDRES 0.100002 Hz  
 AQ 9.9998322 sec  
 RG 57  
 DW 83.300 usec  
 DE 16.70 usec  
 TE 298.0 K  
 D1 10.00000000 sec  
 TD0 1  
 SFO1 400.1320007 MHz  
 NUC1 1H  
 P1 15.00 usec  
 PLW1 14.03299999 W

## F2 - Processing parameters

SI 32768  
 SF 400.1300087 MHz  
 WDW no  
 SSB 0  
 LB 0 Hz  
 GB 0  
 PC 1.00

7.263

5.307  
4.710  
4.709  
4.706  
4.705  
4.693  
4.692  
4.655  
4.651  
4.639

3.465

2.235  
2.180  
2.143  
1.762  
1.5330.975  
0.893  
0.649  
0.632

0.060

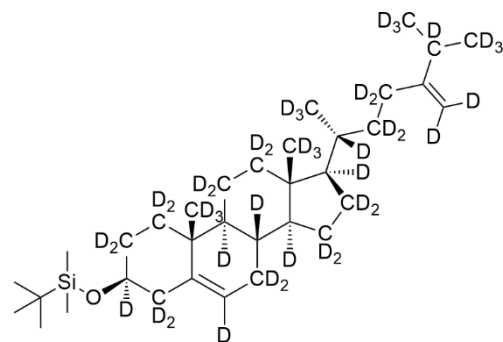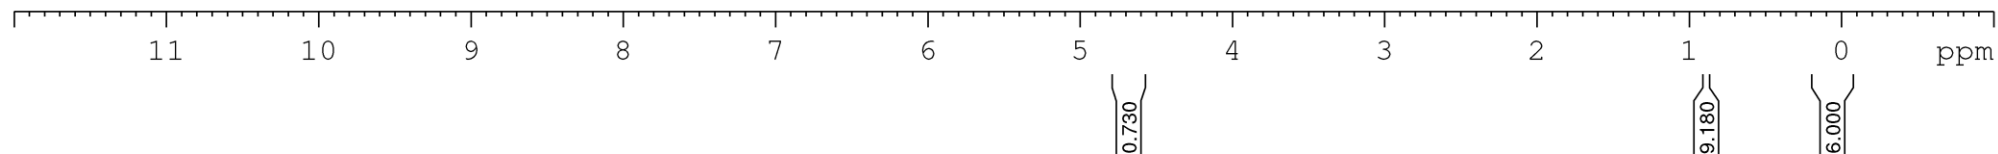

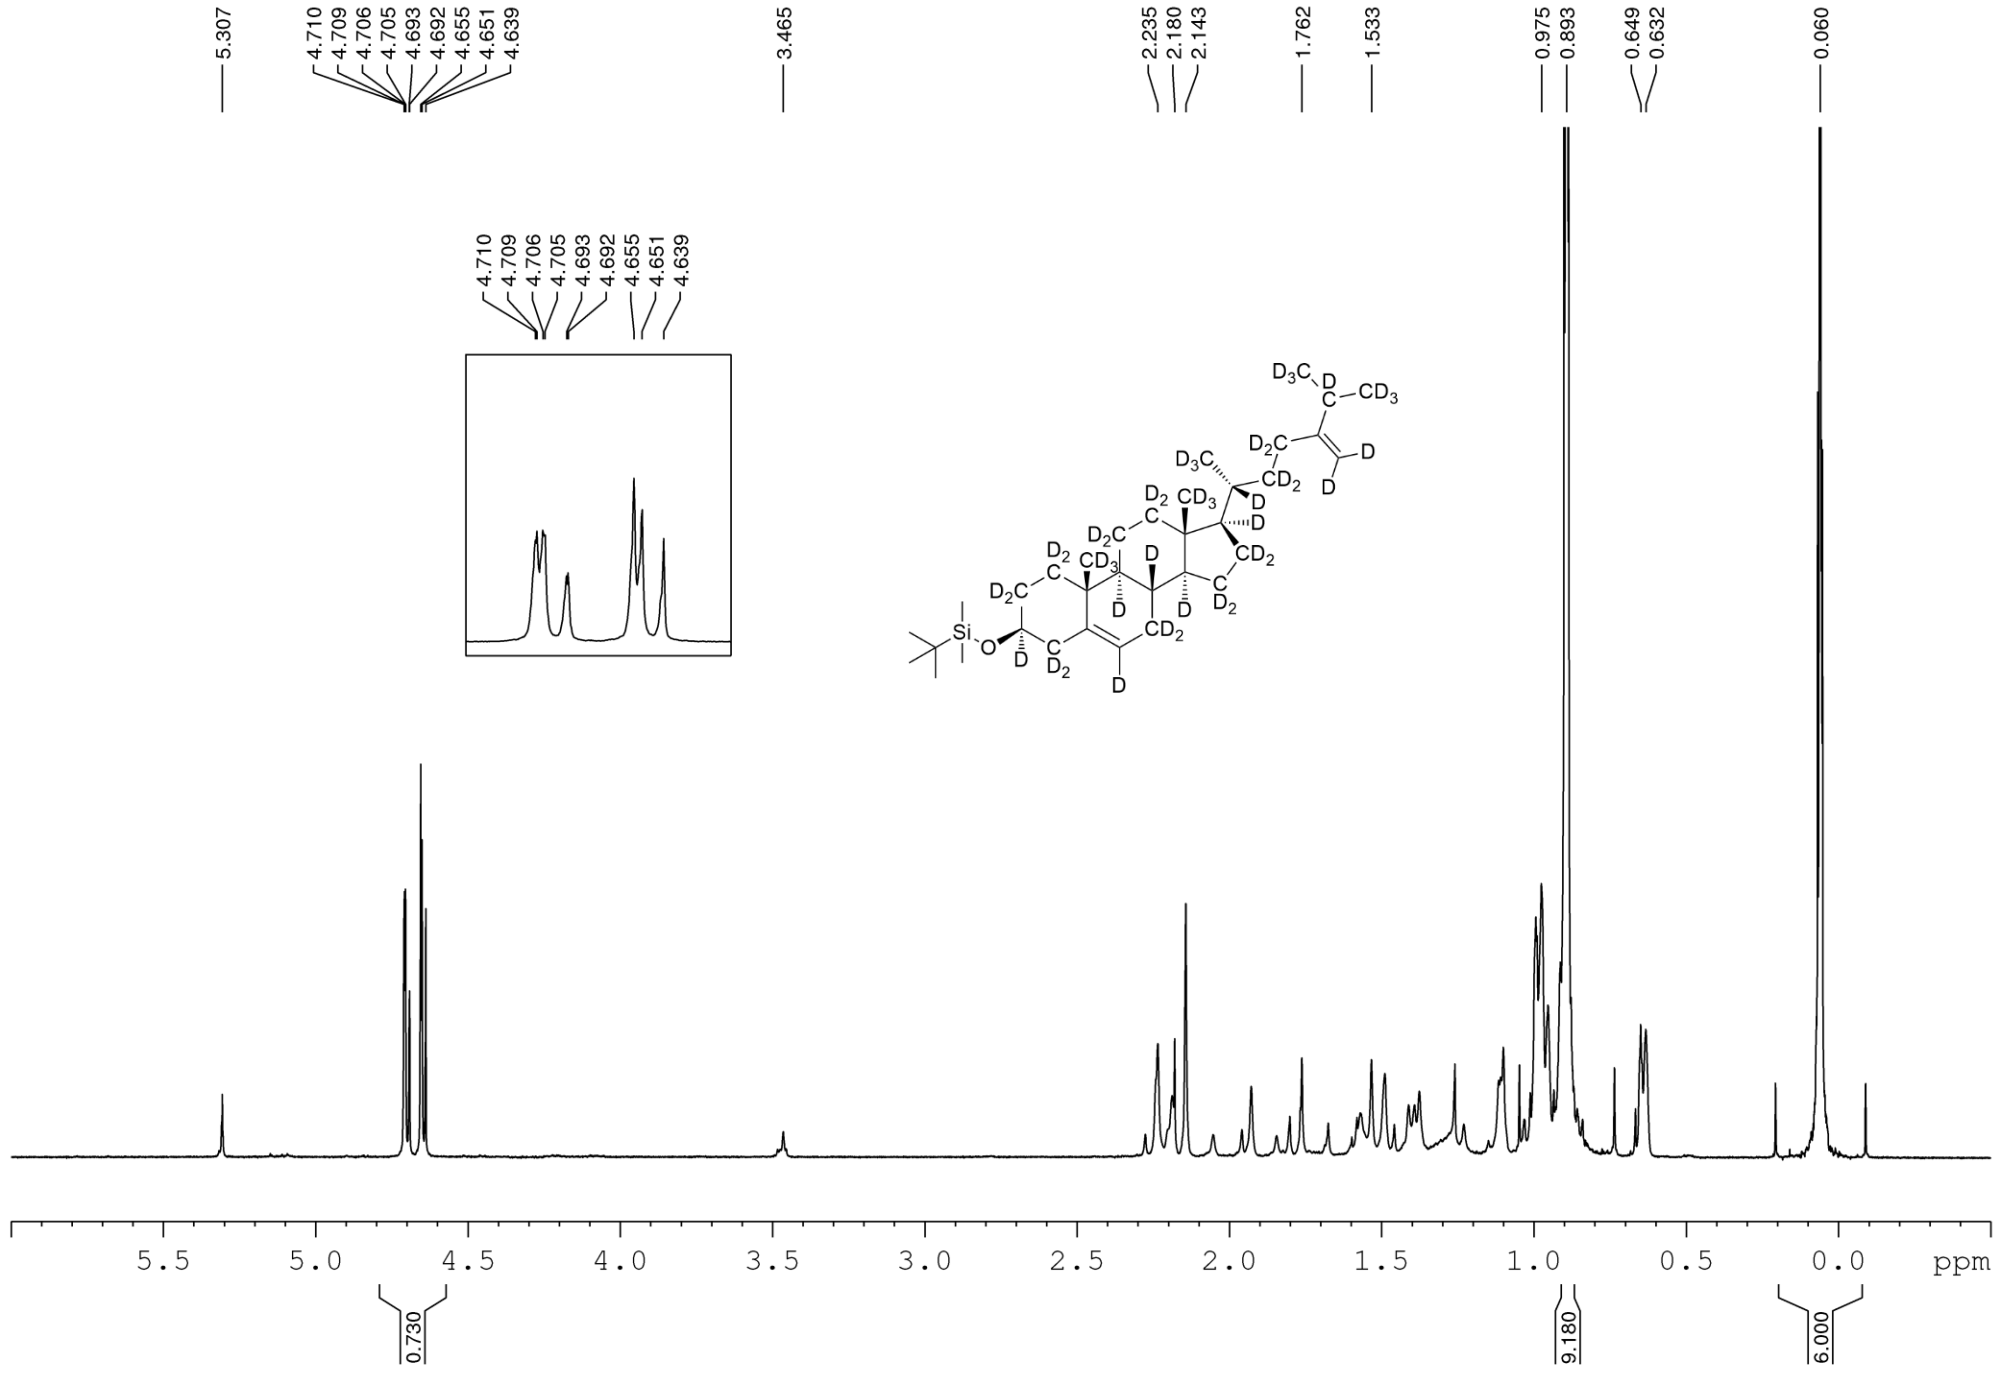

## F2 - Acquisition Parameters

Date\_ 20230215  
Time 17.50 h  
INSTRUM spect  
PROBHD Z108618\_0117 (  
PULPROG zg2h  
TD 8192  
SOLVENT CDCl3  
NS 32  
DS 0  
SWH 921.376 Hz  
FIDRES 0.224945 Hz  
AQ 4.4455252 sec  
RG 45.2  
DW 542.667 usec  
DE 23.73 usec  
TE 298.0 K  
D1 5.00000000 sec  
D11 0.03000000 sec  
TD0 1  
SFO1 61.4226988 MHz  
NUC1 2H  
P1 124.00 usec  
PLW1 29.89100075 W

## F2 - Processing parameters

SI 16384  
SF 61.4223931 MHz  
WDW EM  
SSB 0  
LB 0.30 Hz  
GB 0  
PC 1.00

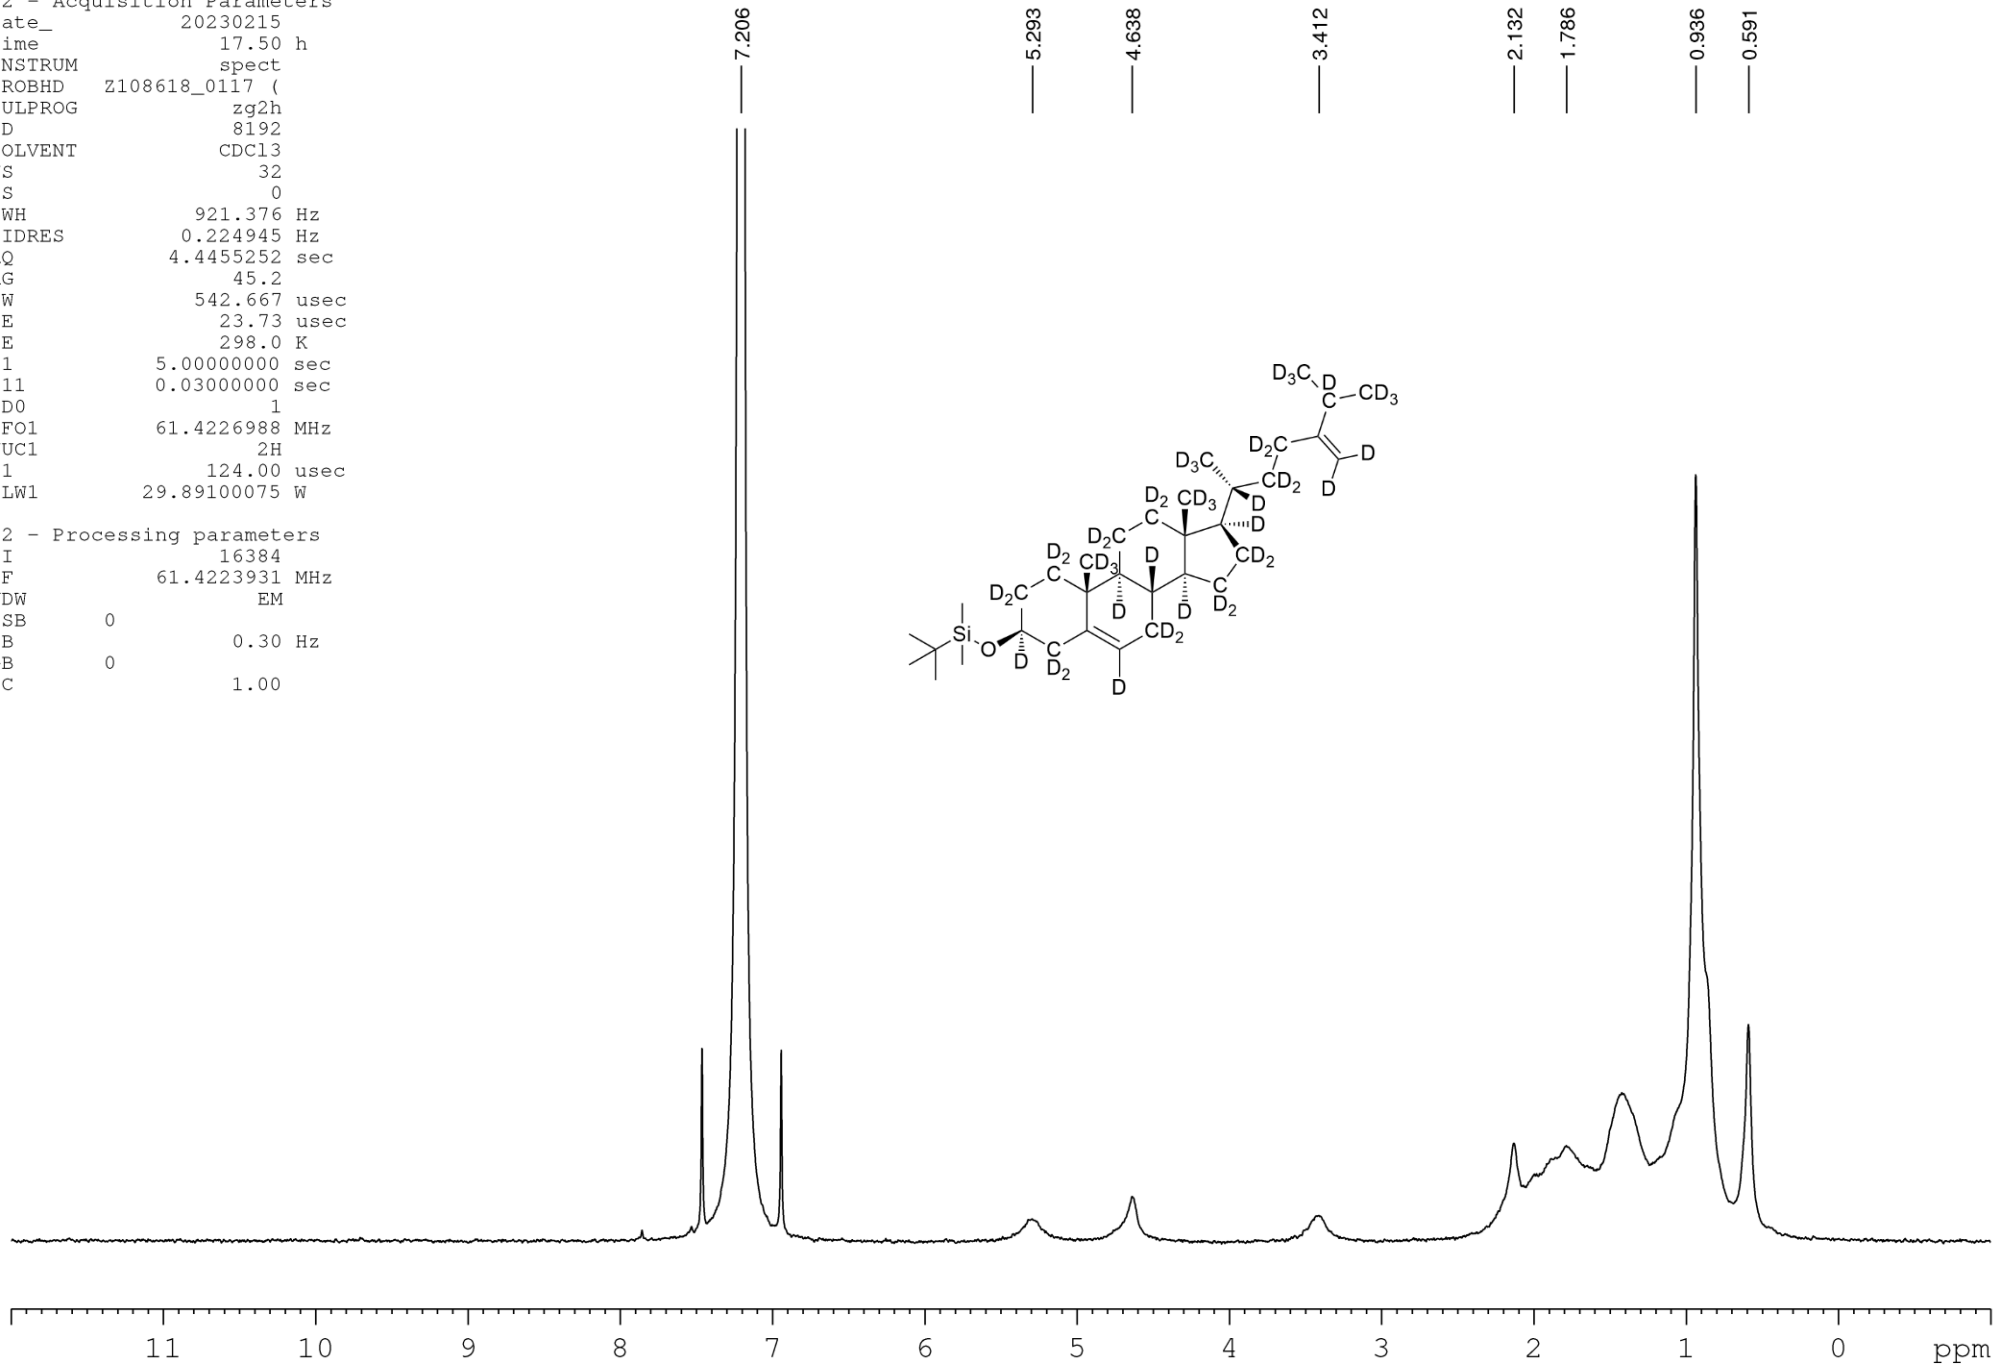

## F2 - Acquisition Parameters

Date\_ 20230220  
 Time 8.31 h  
 INSTRUM spect  
 PROBHD z108618\_0117 (  
 PULPROG zgig2h1h  
 TD 65536  
 SOLVENT CDC13  
 NS 10522  
 DS 0  
 SWH 22058.824 Hz  
 FIDRES 0.673182 Hz  
 AQ 1.4854827 sec  
 RG 203  
 DW 22.667 usec  
 DE 6.50 usec  
 TE 298.0 K  
 D1 20.00000000 sec  
 D11 0.03000000 sec  
 D12 0.00002000 sec  
 TD0 1  
 SFO1 100.6223263 MHz  
 NUC1 13C  
 P1 10.00 usec  
 PLW1 84.53199768 W  
 SFO2 400.1322007 MHz  
 NUC2 1H  
 CPDPRG[2] waltz16  
 PCPD2 90.00 usec  
 PLW2 14.03299999 W  
 PLW12 0.38982001 W  
 SFO3 61.4227600 MHz  
 NUC3 2H  
 CPDPRG[3] waltz16  
 PCPD3 375.00 usec  
 PLW3 29.89100075 W  
 PLW17 3.06999993 W

## F2 - Processing parameters

SI 65536  
 SF 100.6127542 MHz  
 WDW EM  
 SSB 0  
 LB 1.00 Hz  
 GB 0  
 PC 1.40

156.960  
 156.870  
 156.801  
 156.777

141.741

120.816

106.064  
 105.793  
 105.508

77.160

72.108

55.980  
 55.133  
 55.118  
 49.321  
 41.982  
 38.743  
 36.454  
 36.171  
 34.775  
 33.673  
 32.906  
 31.187  
 31.158  
 31.125  
 31.005  
 30.084  
 27.283  
 26.103  
 23.389  
 20.888  
 20.201  
 18.422  
 17.776  
 11.046

-4.420

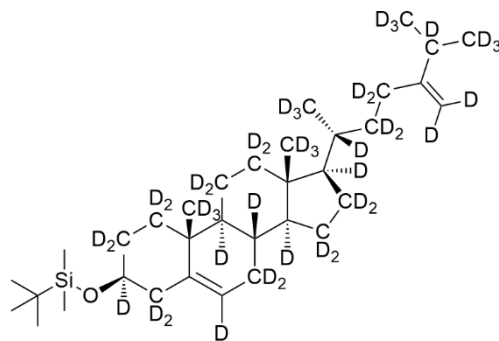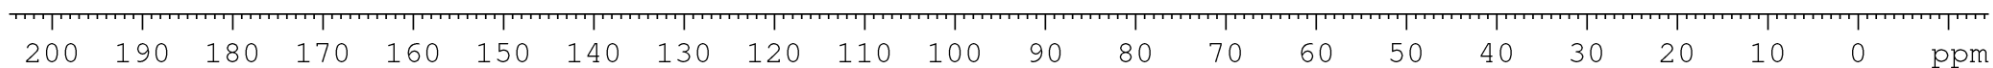

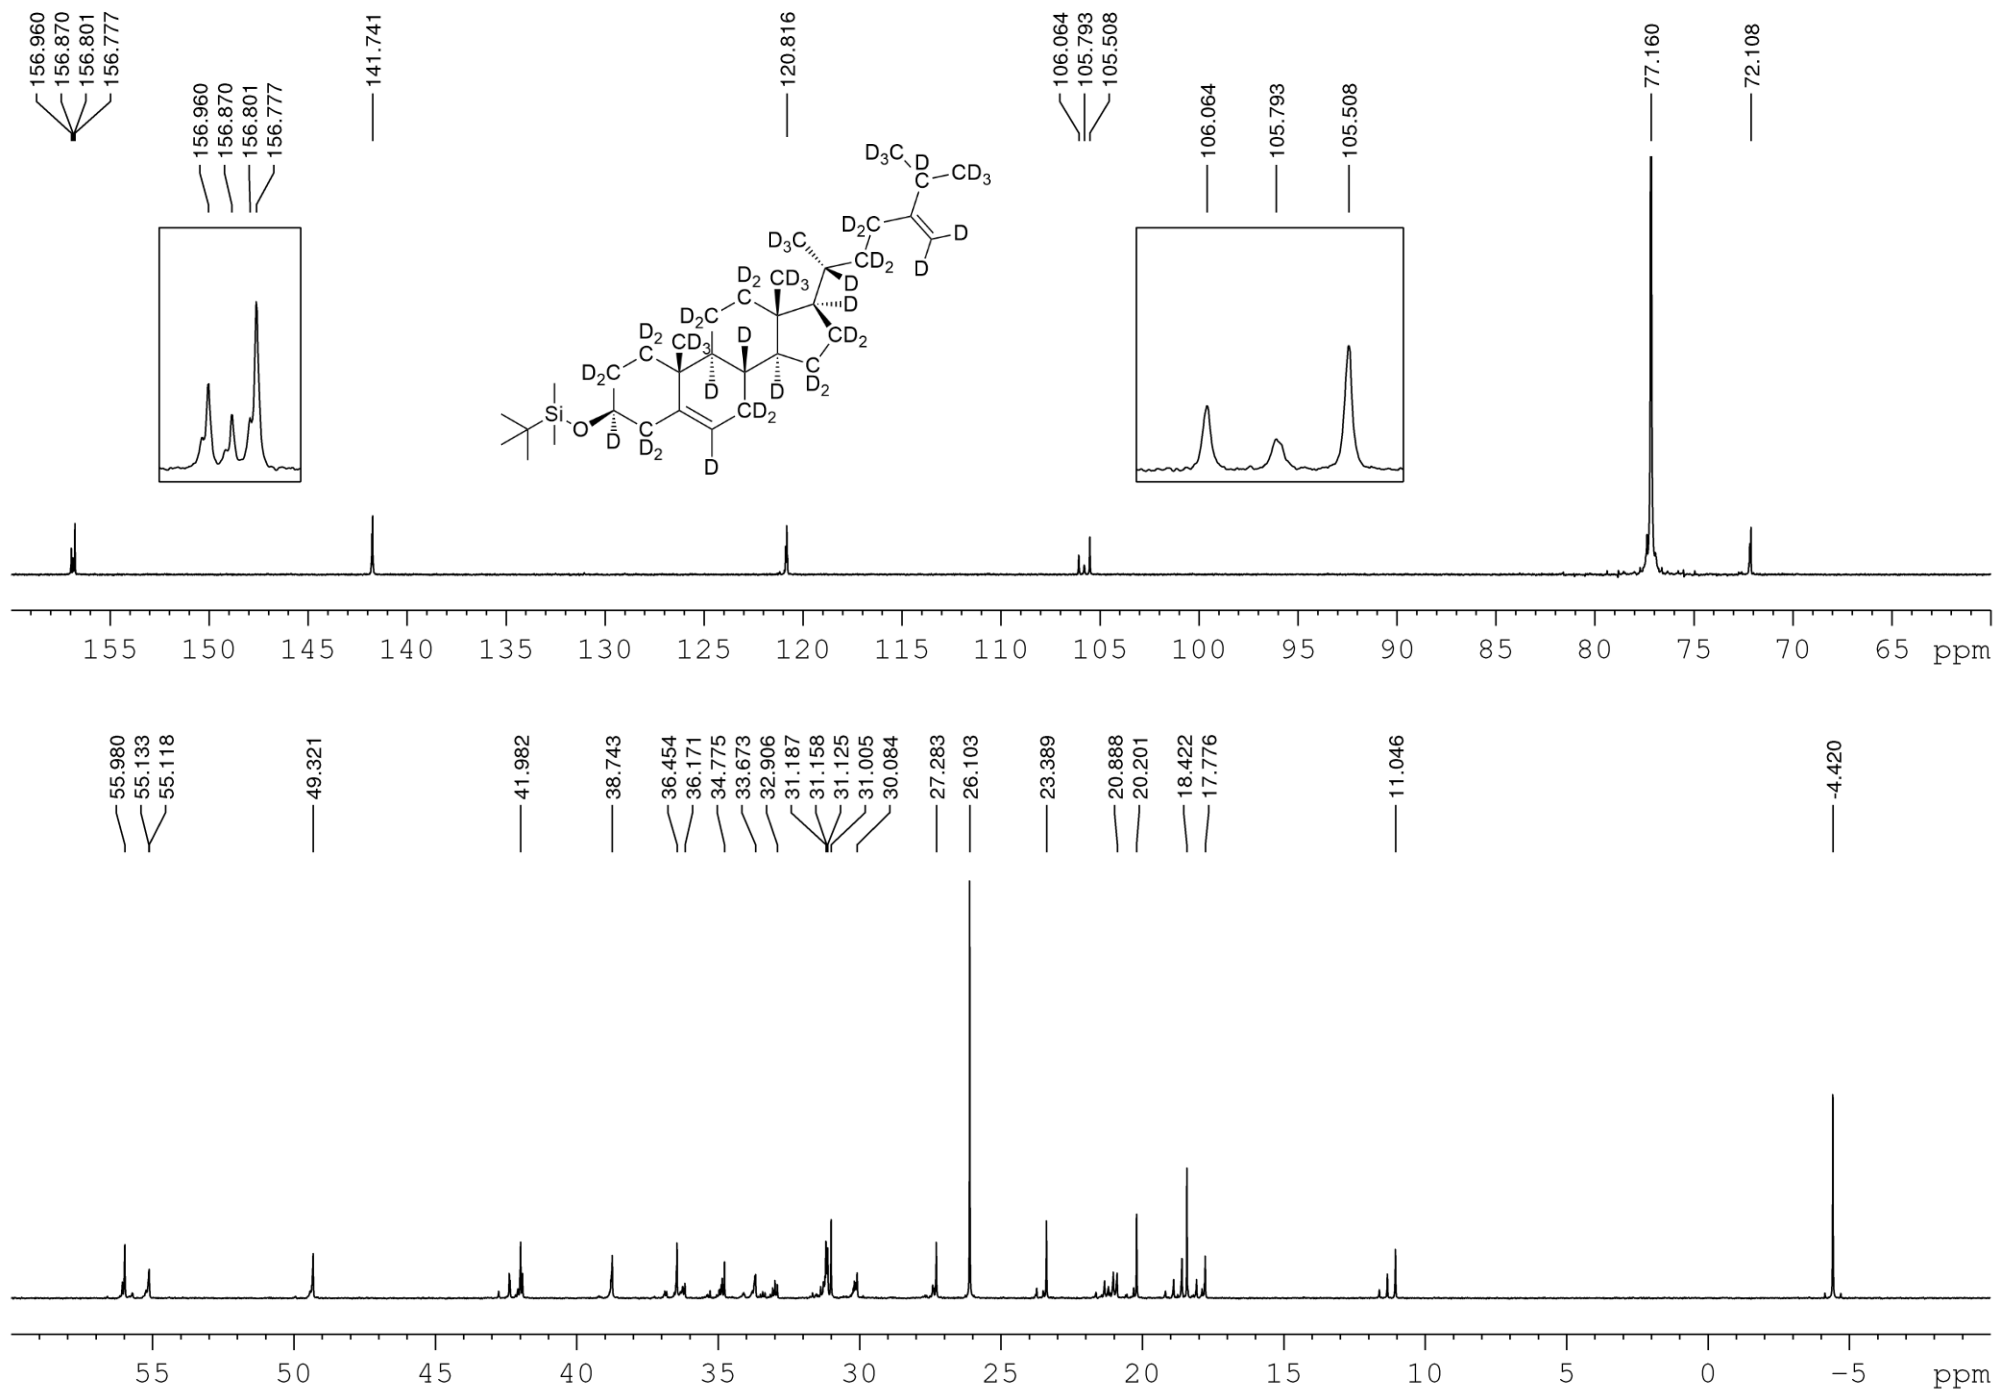

O-TBS-24-methylenecholesterol-*d*<sub>45</sub> (87%-*d*)

<sup>13</sup>C{<sup>1</sup>H} NMR

F2 - Acquisition Parameters  
 Date\_ 20230217  
 Time 10.35 h  
 INSTRUM spect  
 PROBHD z108618\_0117 (  
 PULPROG zgpg30  
 TD 65536  
 SOLVENT CDCl3  
 NS 16975  
 DS 0  
 SWH 22058.824 Hz  
 FIDRES 0.673182 Hz  
 AQ 1.4854827 sec  
 RG 203  
 DW 22.667 usec  
 DE 8.02 usec  
 TE 298.0 K  
 D1 2.00000000 sec  
 D11 0.03000000 sec  
 TD0 1  
 SFO1 100.6223248 MHz  
 NUC1 13C  
 P1 10.00 usec  
 PLW1 84.53199768 W  
 SFO2 400.1320007 MHz  
 NUC2 1H  
 CPDPRG[2] waltz16  
 PCPD2 90.00 usec  
 PLW2 14.03299999 W  
 PLW12 0.38982001 W  
 PLW13 0.19607000 W

F2 - Processing parameters  
 SI 65536  
 SF 100.6127538 MHz  
 WDW EM  
 SSB 0  
 LB 1.00 Hz  
 GB 0  
 PC 1.40

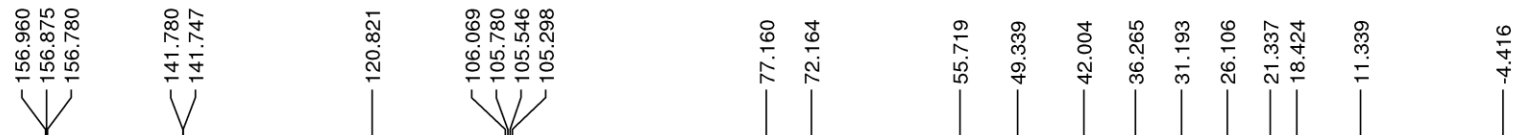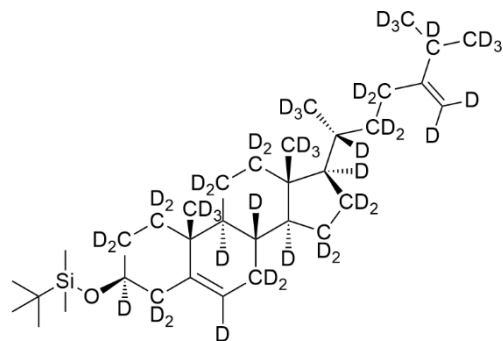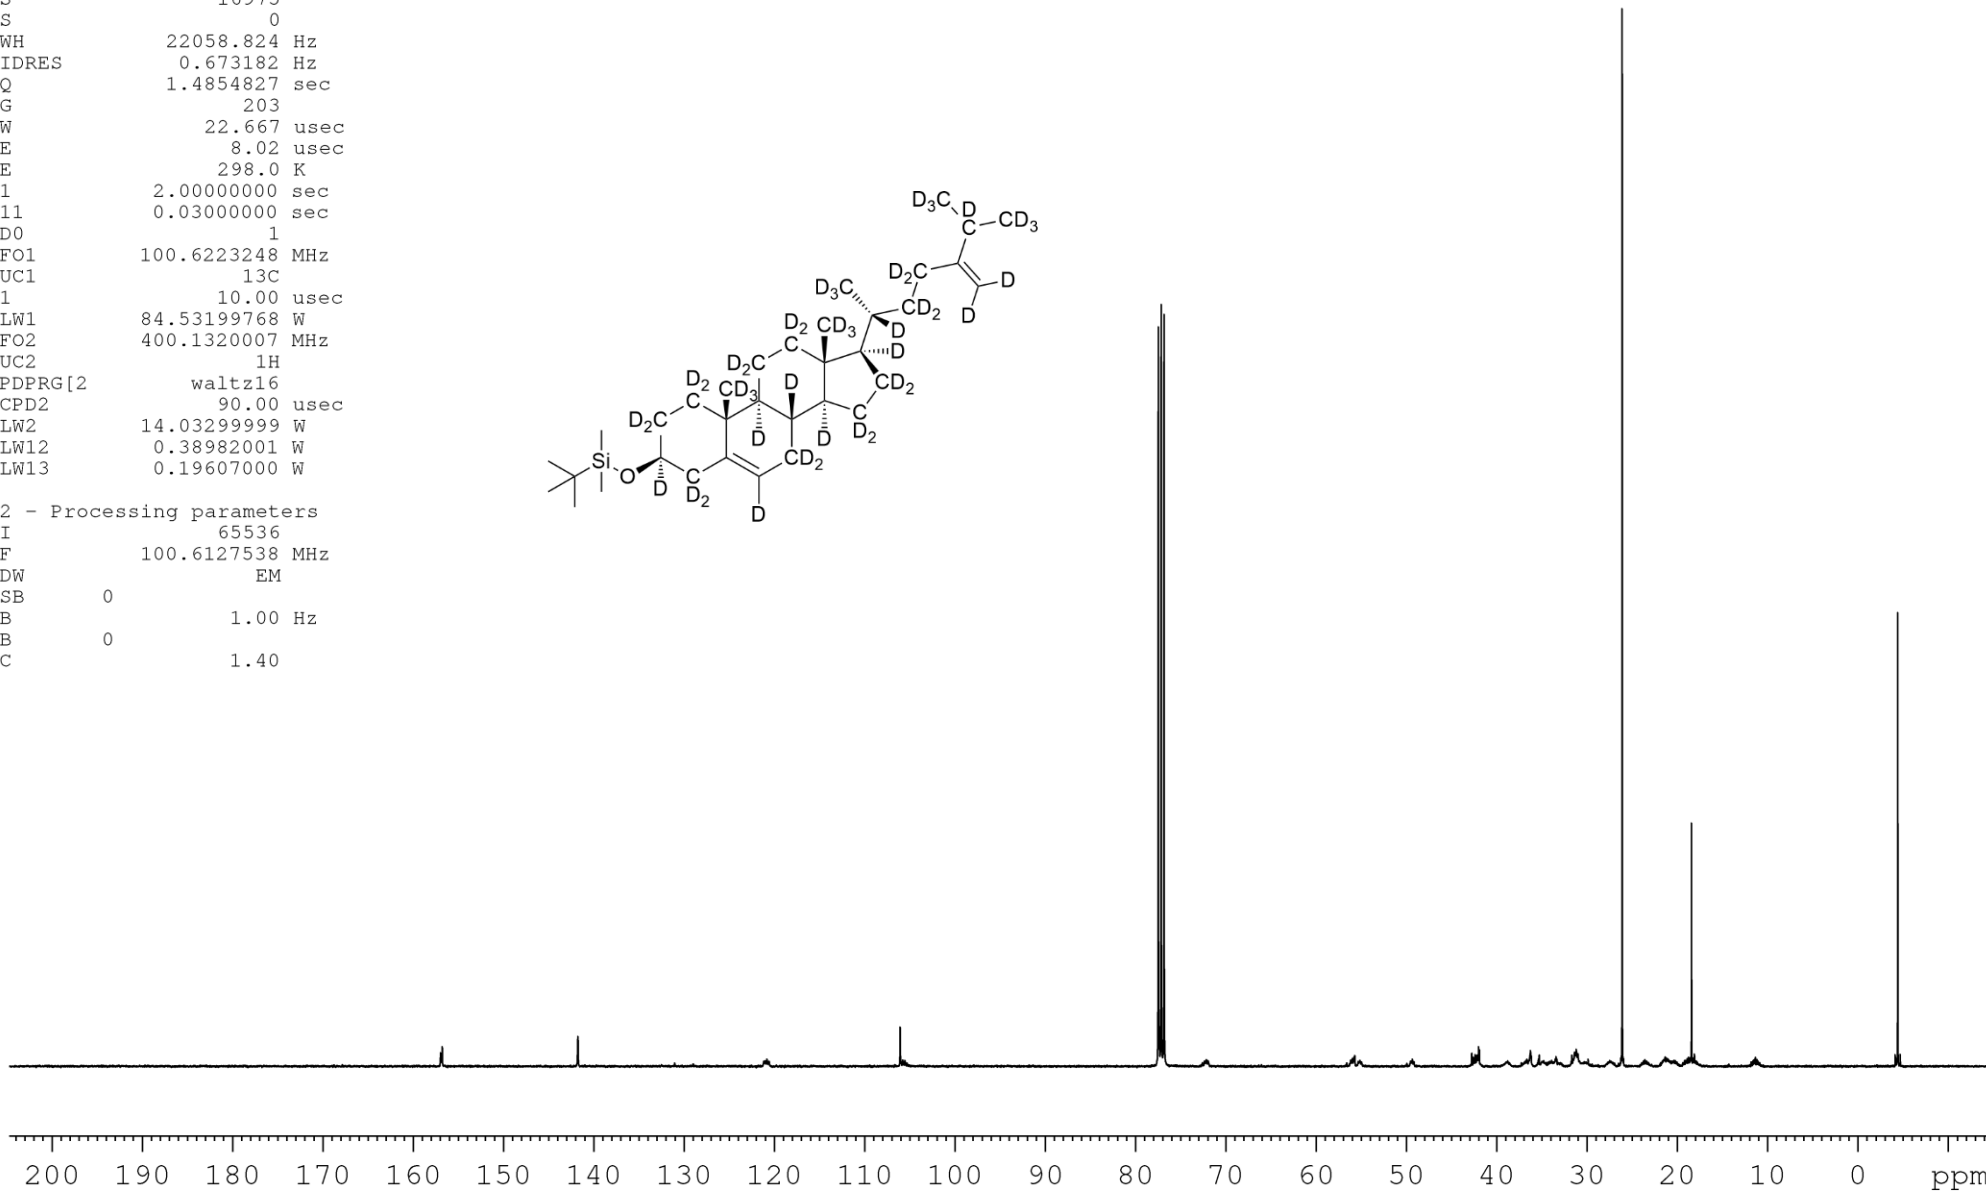

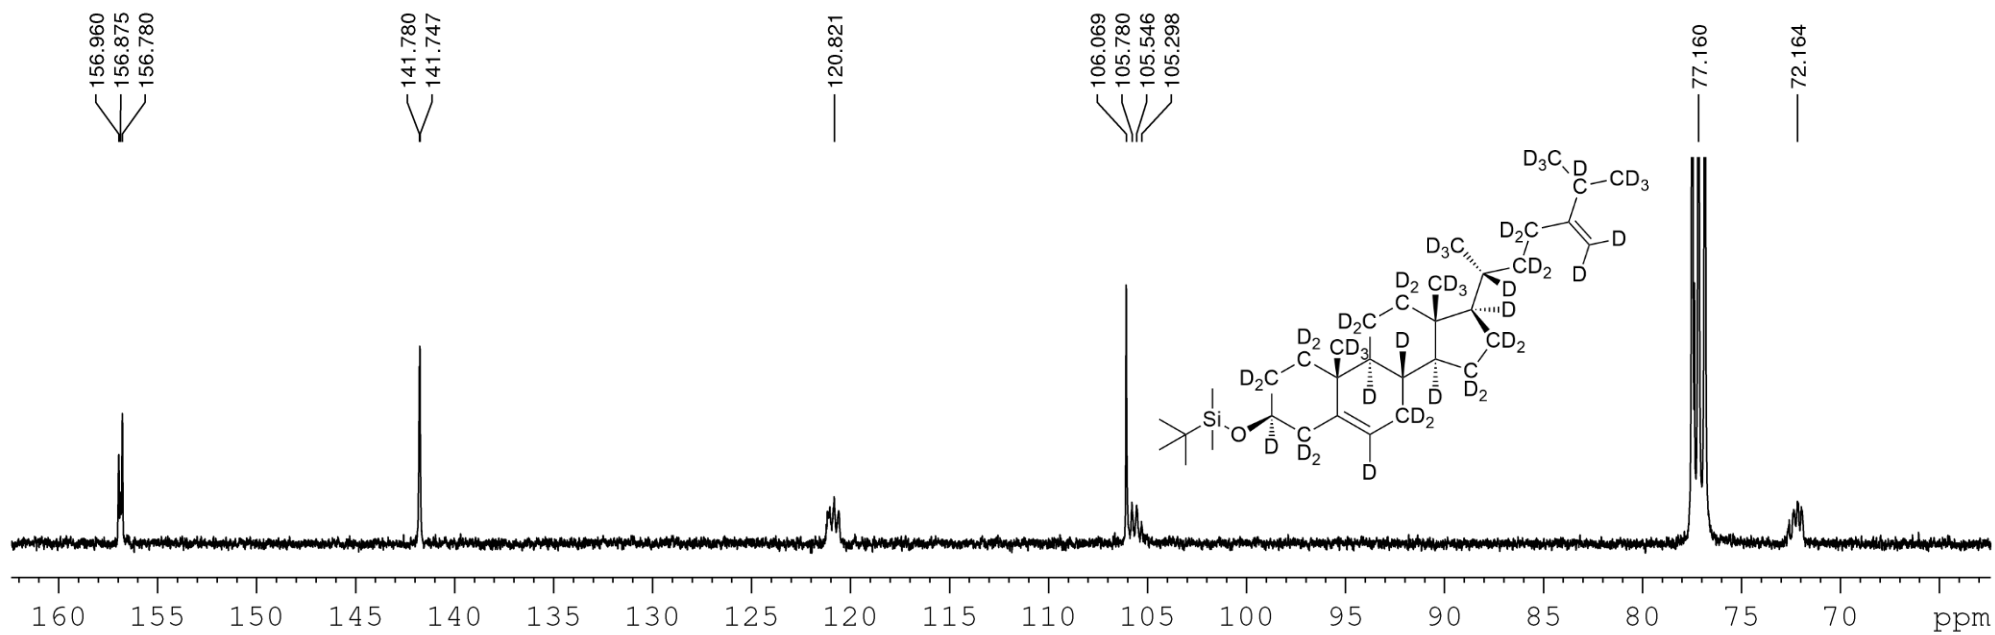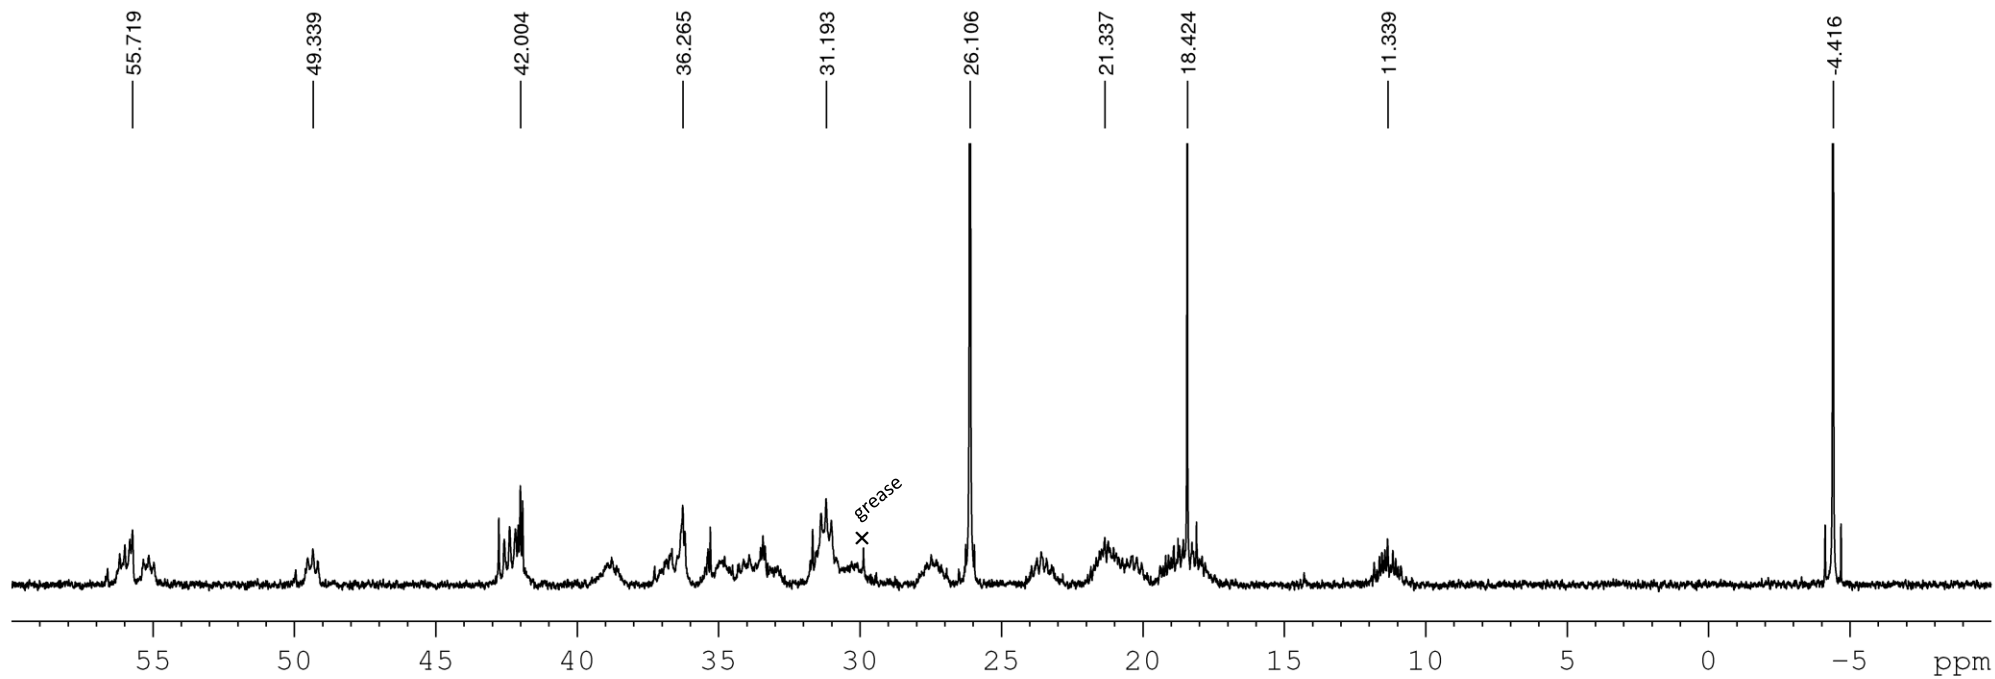

## F2 - Acquisition Parameters

Date\_ 20230224  
Time 10.55 h  
INSTRUM spect  
PROBHD Z108618\_0117 (  
PULPROG zg  
TD 120046  
SOLVENT CDCl3  
NS 8  
DS 0  
SWH 6002.401 Hz  
FIDRES 0.100002 Hz  
AQ 9.9998322 sec  
RG 90.5  
DW 83.300 usec  
DE 16.70 usec  
TE 298.1 K  
D1 10.00000000 sec  
TD0 1  
SFO1 400.1320007 MHz  
NUC1 1H  
P1 15.00 usec  
PLW1 14.03299999 W

## F2 - Processing parameters

SI 32768  
SF 400.1300086 MHz  
WDW no  
SSB 0  
LB 0 Hz  
GB 0  
PC 1.00

7.263

5.335

3.500

1.627

1.253

0.955

0.739

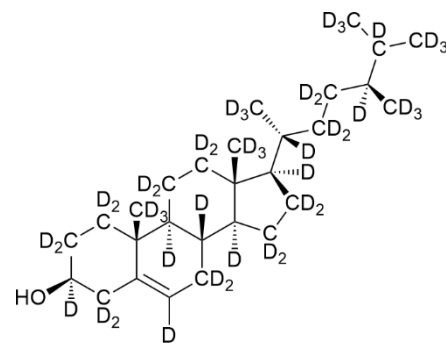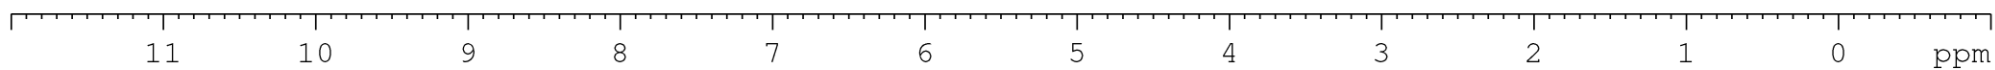



## F2 - Acquisition Parameters

Date\_ 20230224  
Time 12.20 h  
INSTRUM spect  
PROBHD Z108618\_0117 (  
PULPROG zg2h  
TD 8192  
SOLVENT CDCl3  
NS 512  
DS 0  
SWH 921.376 Hz  
FIDRES 0.224945 Hz  
AQ 4.4455252 sec  
RG 45.2  
DW 542.667 usec  
DE 23.73 usec  
TE 298.0 K  
D1 5.00000000 sec  
D11 0.03000000 sec  
TD0 1  
SFO1 61.4226988 MHz  
NUC1 2H  
P1 124.00 usec  
PLW1 29.89100075 W

## F2 - Processing parameters

SI 16384  
SF 61.4223931 MHz  
WDW EM  
SSB 0  
LB 0.30 Hz  
GB 0  
PC 1.00

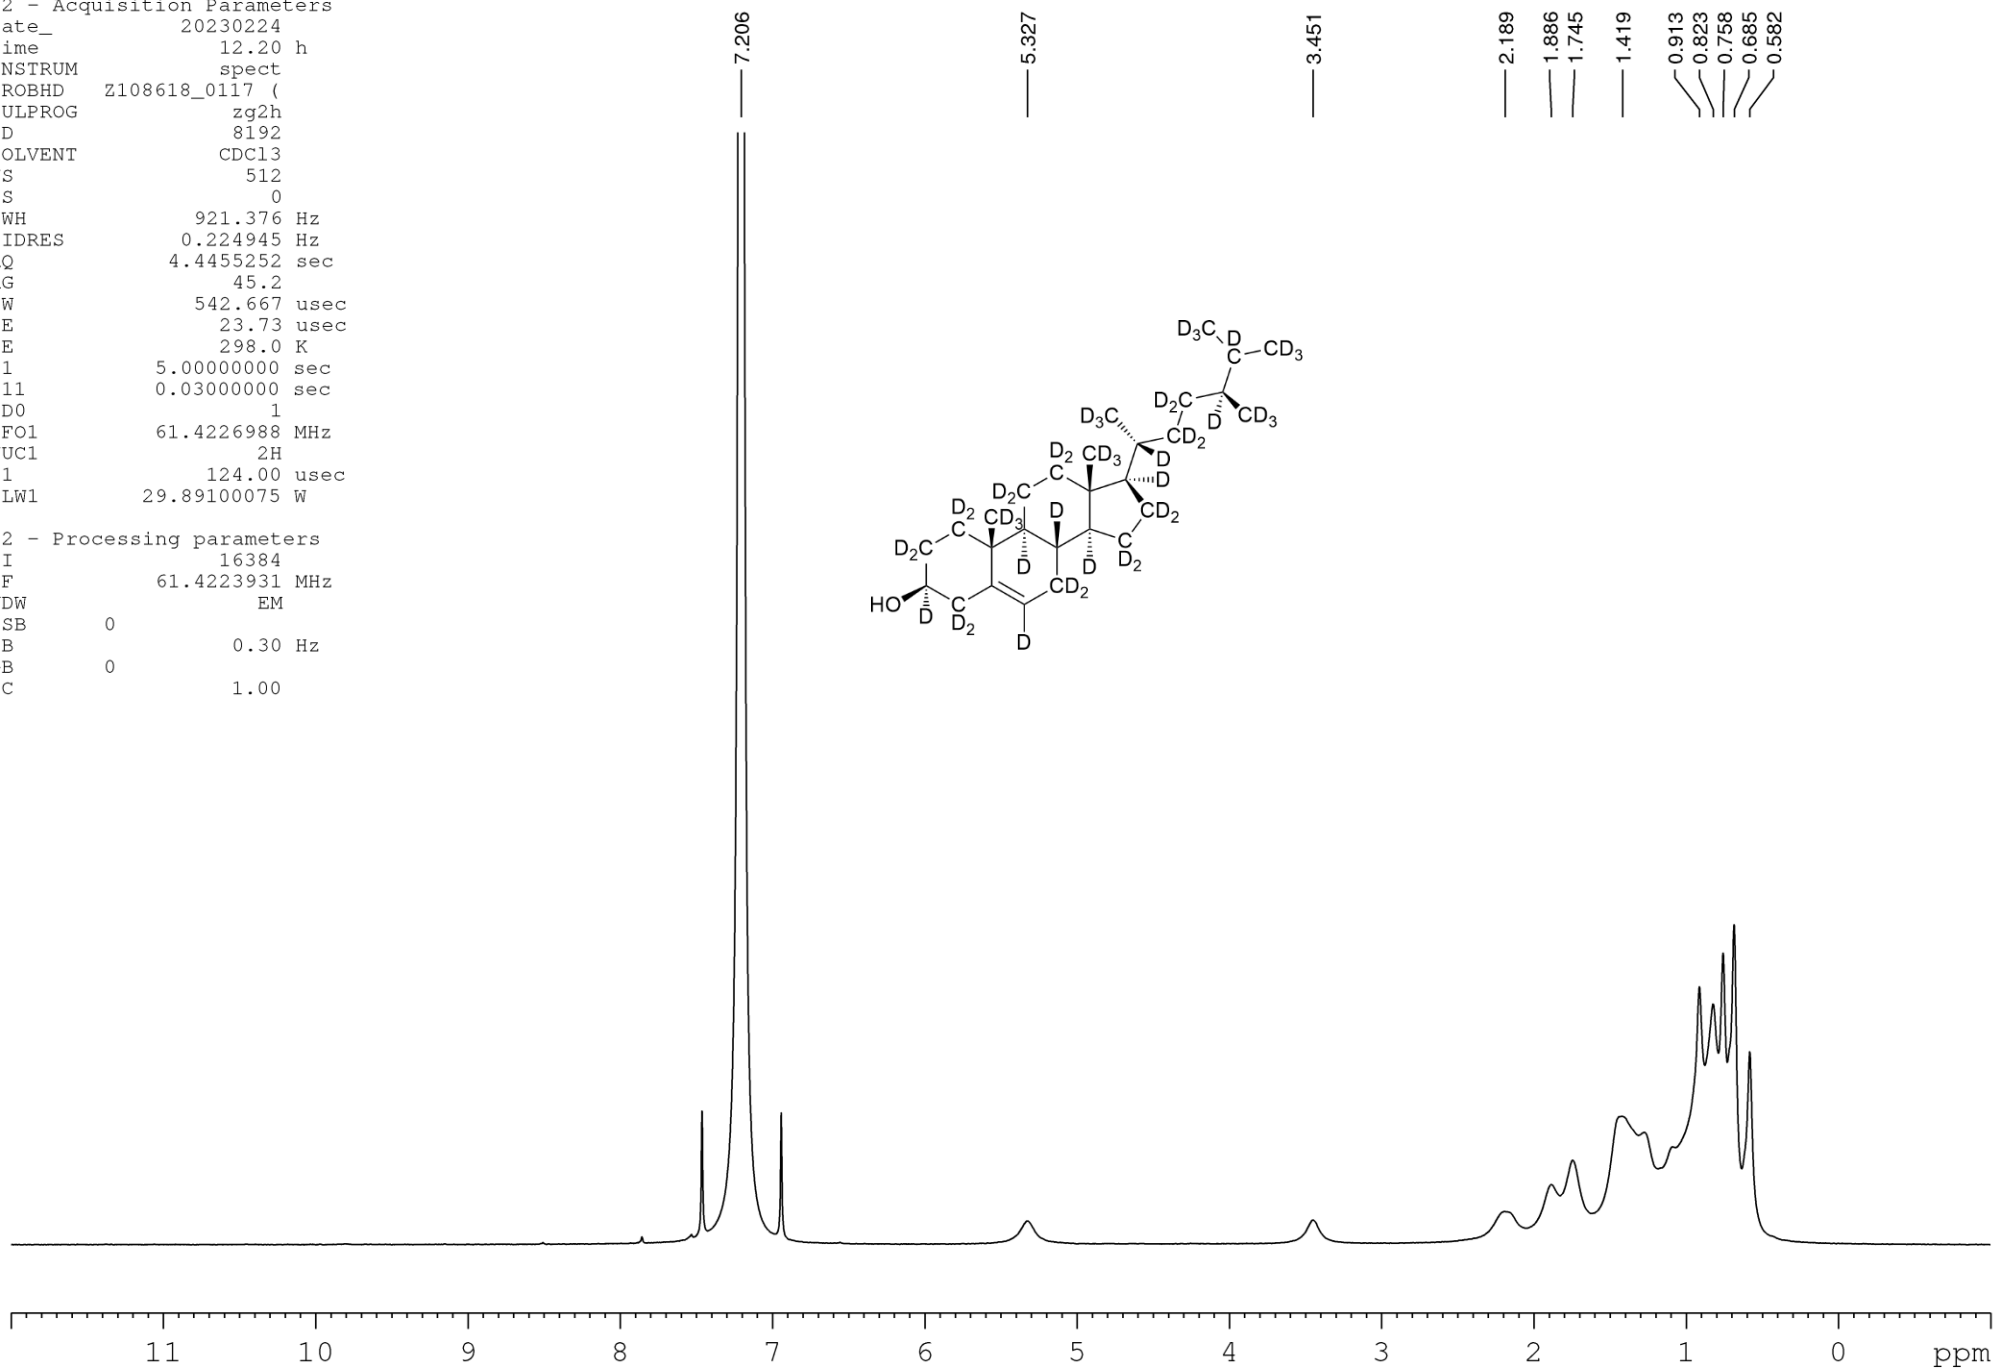

## F2 - Acquisition Parameters

Date\_ 20230227  
 Time 8.44 h  
 INSTRUM spect  
 PROBHD z108618\_0117 (  
 PULPROG zgig2h1h  
 TD 65536  
 SOLVENT CDC13  
 NS 10724  
 DS 0  
 SWH 22058.824 Hz  
 FIDRES 0.673182 Hz  
 AQ 1.4854827 sec  
 RG 203  
 DW 22.667 usec  
 DE 6.50 usec  
 TE 298.0 K  
 D1 20.00000000 sec  
 D11 0.03000000 sec  
 D12 0.00002000 sec  
 TD0 1  
 SFO1 100.6223263 MHz  
 NUC1 13C  
 P1 10.00 usec  
 PLW1 84.53199768 W  
 SFO2 400.1322007 MHz  
 NUC2 1H  
 CPDPRG[2] waltz16  
 PCPD2 90.00 usec  
 PLW2 14.03299999 W  
 PLW12 0.38982001 W  
 SFO3 61.4227600 MHz  
 NUC3 2H  
 CPDPRG[3] waltz16  
 PCPD3 375.00 usec  
 PLW3 29.89100075 W  
 PLW17 3.06999993 W

## F2 - Processing parameters

SI 65536  
 SF 100.6127557 MHz  
 WDW EM  
 SSB 0  
 LB 1.00 Hz  
 GB 0  
 PC 1.40

140.952  
140.919

121.349

77.160

71.223

55.913  
55.109  
49.229  
41.839  
41.431  
38.682  
36.313  
35.182  
32.604  
31.155  
30.962  
30.661  
29.524  
27.238  
23.379  
20.196  
19.504  
18.547  
17.932  
16.634  
15.128  
14.827  
14.526  
11.032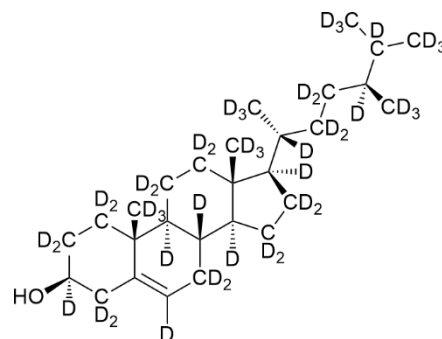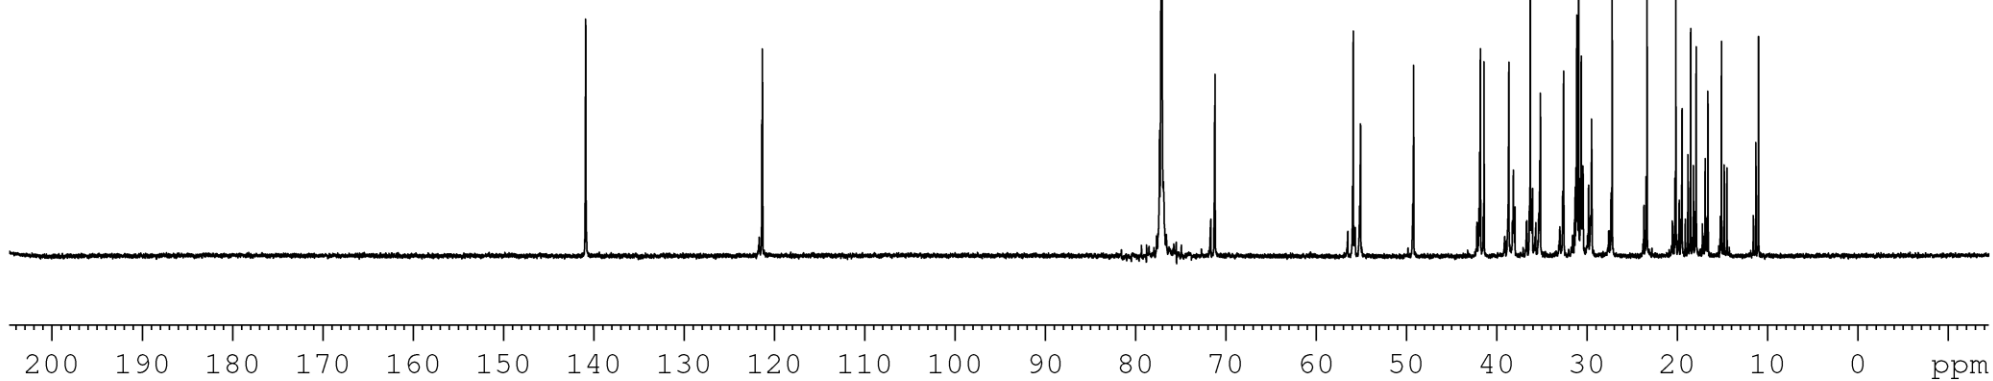

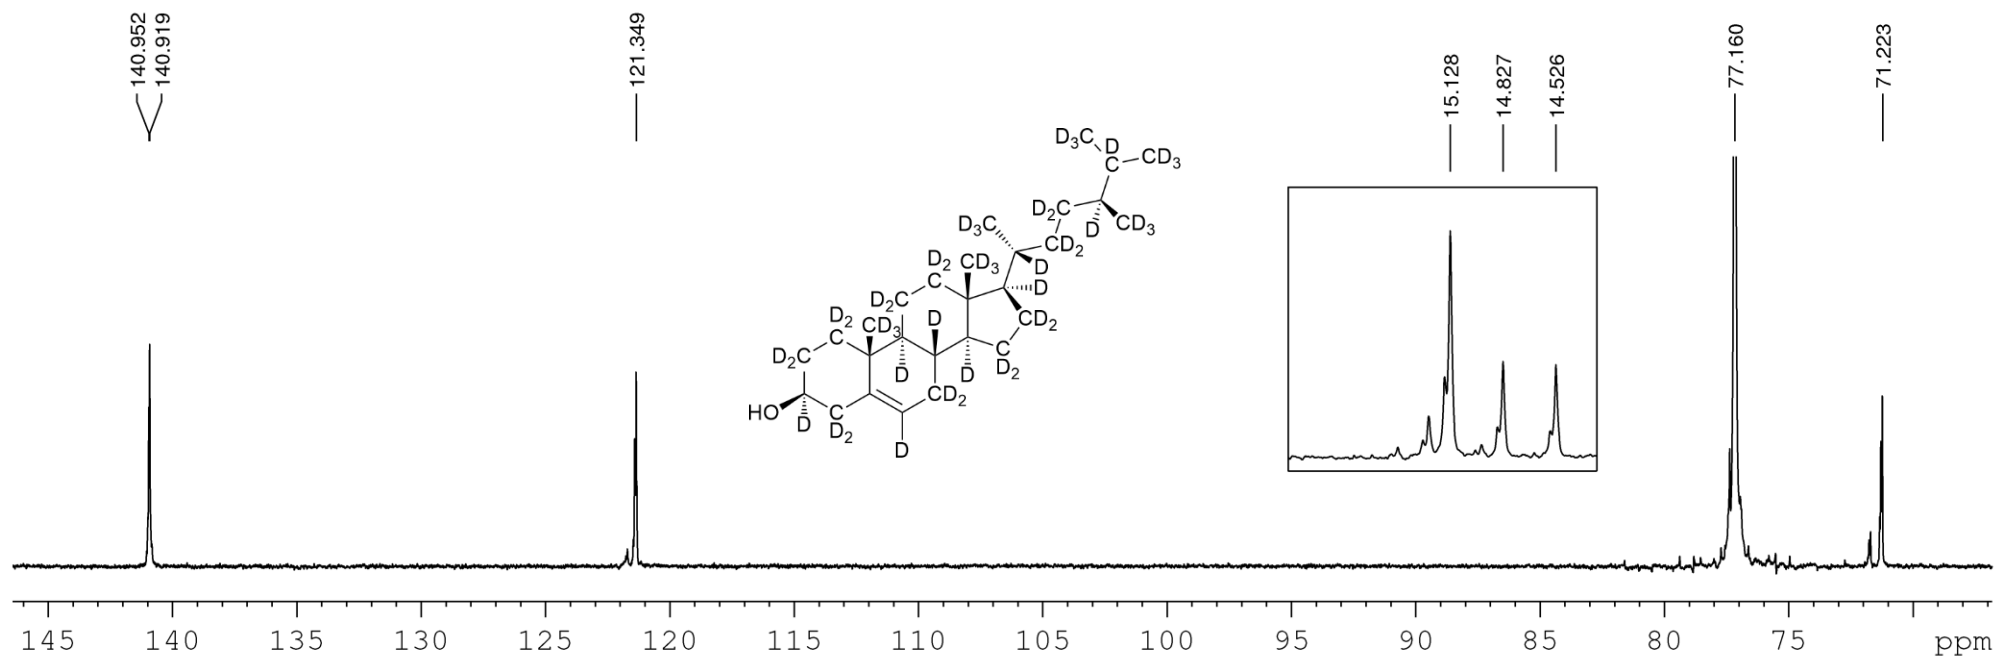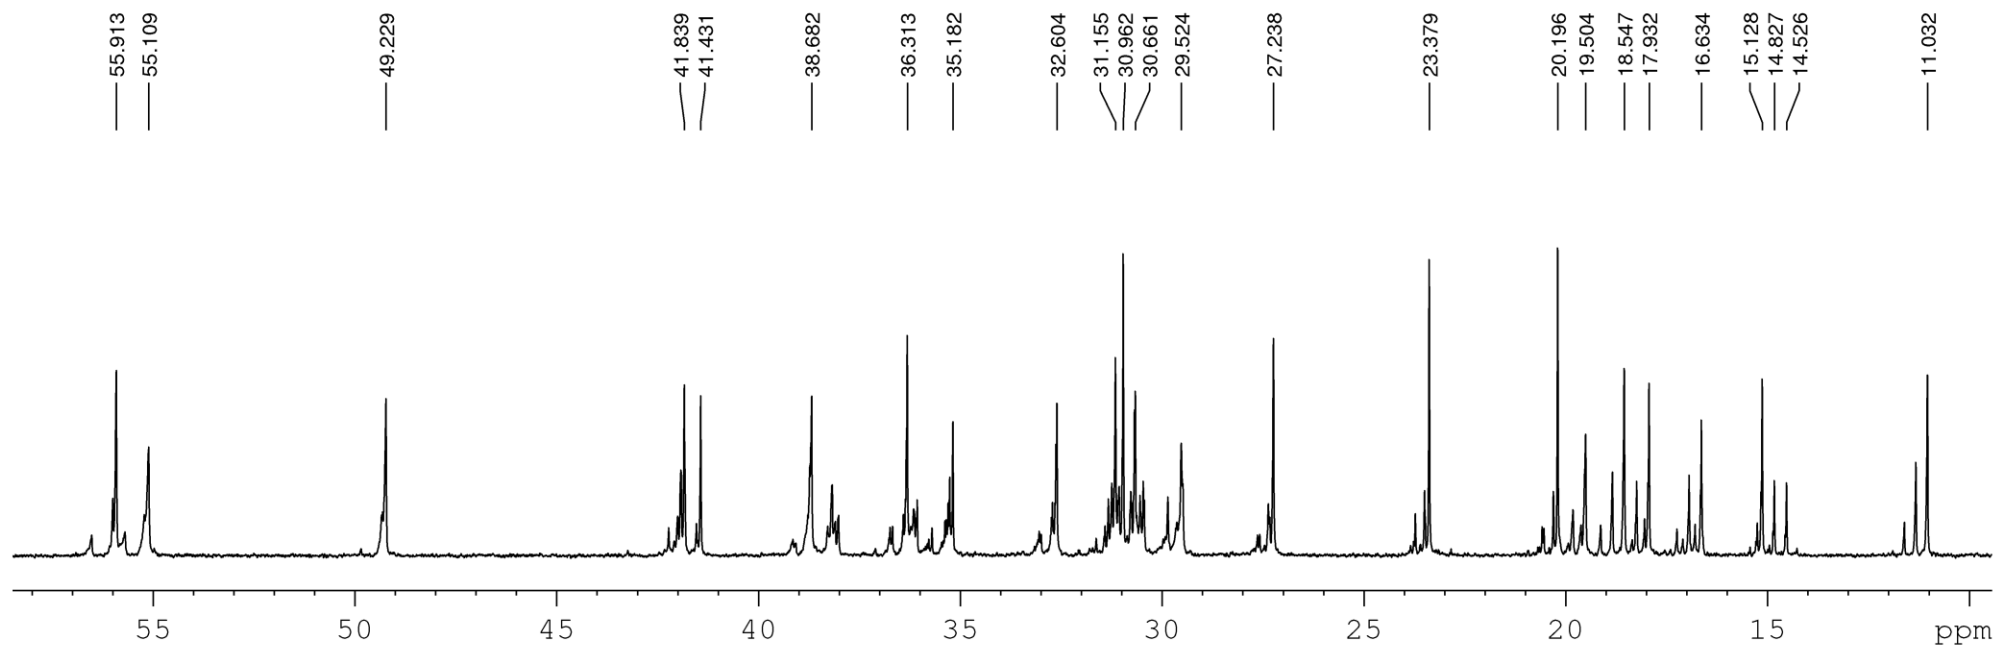

## F2 - Acquisition Parameters

Date\_ 20230227  
Time 11.27 h  
INSTRUM spect  
PROBHD Z108618\_0117 (  
PULPROG zgpg30  
TD 65536  
SOLVENT CDCl3  
NS 2697  
DS 0  
SWH 22058.824 Hz  
FIDRES 0.673182 Hz  
AQ 1.4854827 sec  
RG 203  
DW 22.667 usec  
DE 8.02 usec  
TE 297.9 K  
D1 2.00000000 sec  
D11 0.03000000 sec  
TD0 1  
SFO1 100.6223248 MHz  
NUC1 13C  
P1 10.00 usec  
PLW1 84.53199768 W  
SFO2 400.1320007 MHz  
NUC2 1H  
CPDPRG[2] waltz16  
PCPD2 90.00 usec  
PLW2 14.03299999 W  
PLW12 0.38982001 W  
PLW13 0.19607000 W

## F2 - Processing parameters

SI 65536  
SF 100.6127558 MHz  
WDW EM  
SSB 0  
LB 1.00 Hz  
GB 0  
PC 1.40

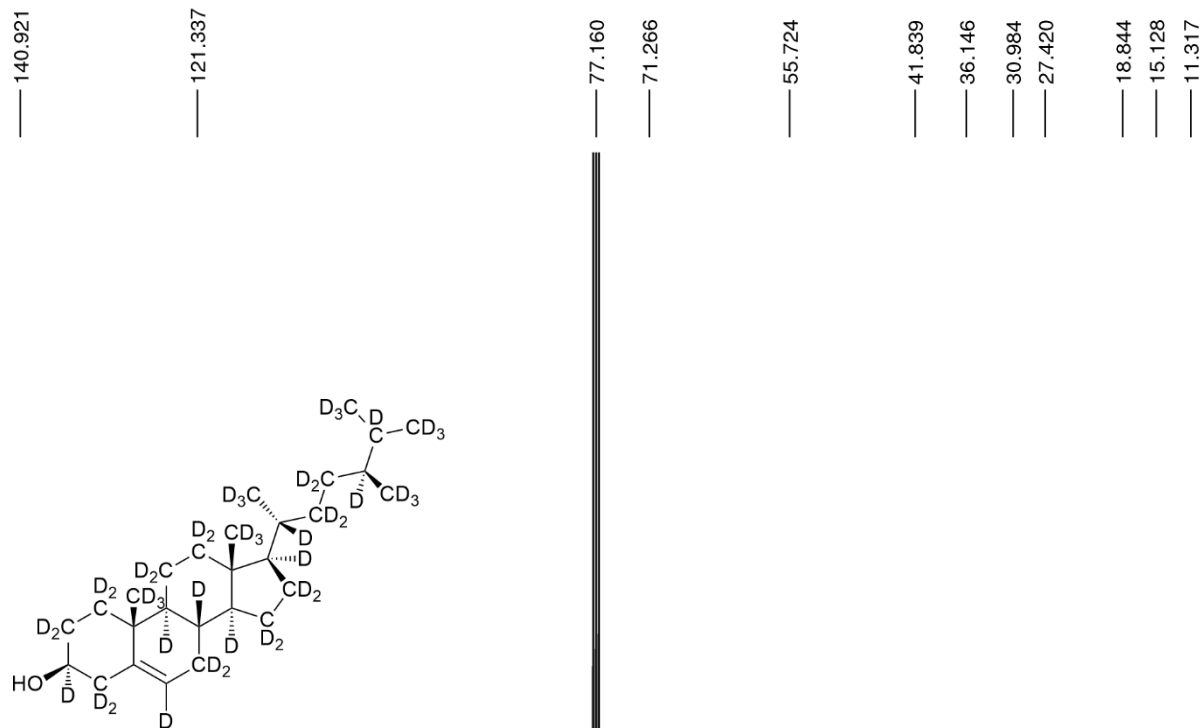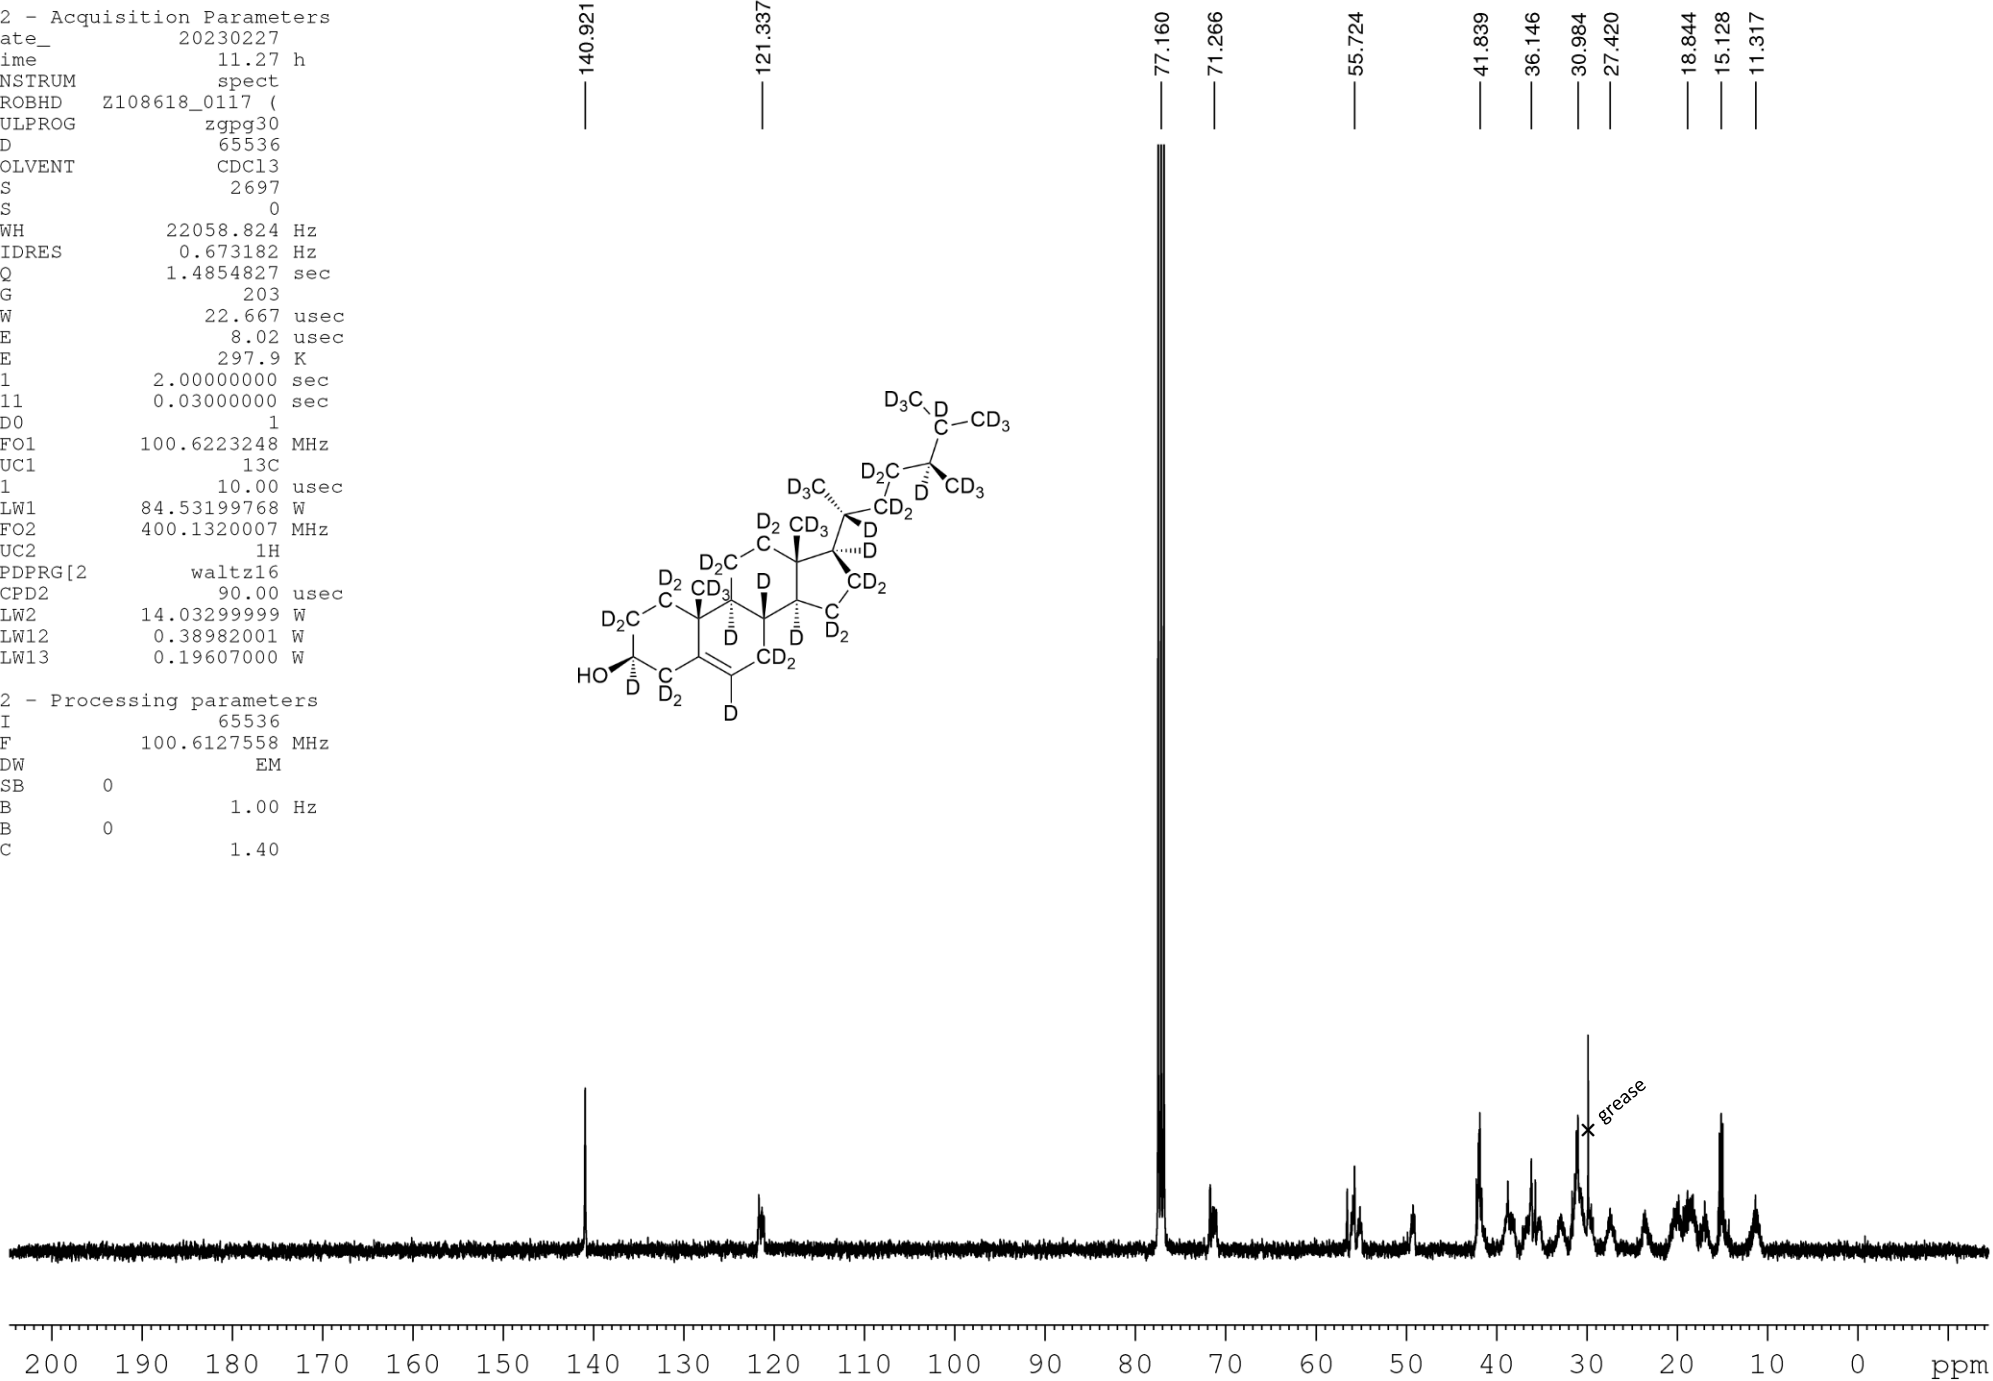

F2 - Acquisition Parameters  
 Date\_ 20230303  
 Time 18.38 h  
 INSTRUM spect  
 PROBHD Z108618\_0117 (  
 PULPROG zg  
 TD 120046  
 SOLVENT CDCl3  
 NS 2  
 DS 0  
 SWH 6002.401 Hz  
 FIDRES 0.100002 Hz  
 AQ 9.9998322 sec  
 RG 203  
 DW 83.300 usec  
 DE 16.70 usec  
 TE 297.8 K  
 D1 10.00000000 sec  
 TDO 1  
 SFO1 400.1320007 MHz  
 NUC1 1H  
 P1 15.00 usec  
 PLW1 14.03299999 W

F2 - Processing parameters  
 SI 32768  
 SF 400.1300085 MHz  
 WDW no  
 SSB 0  
 LB 0 Hz  
 GB 0  
 PC 1.00

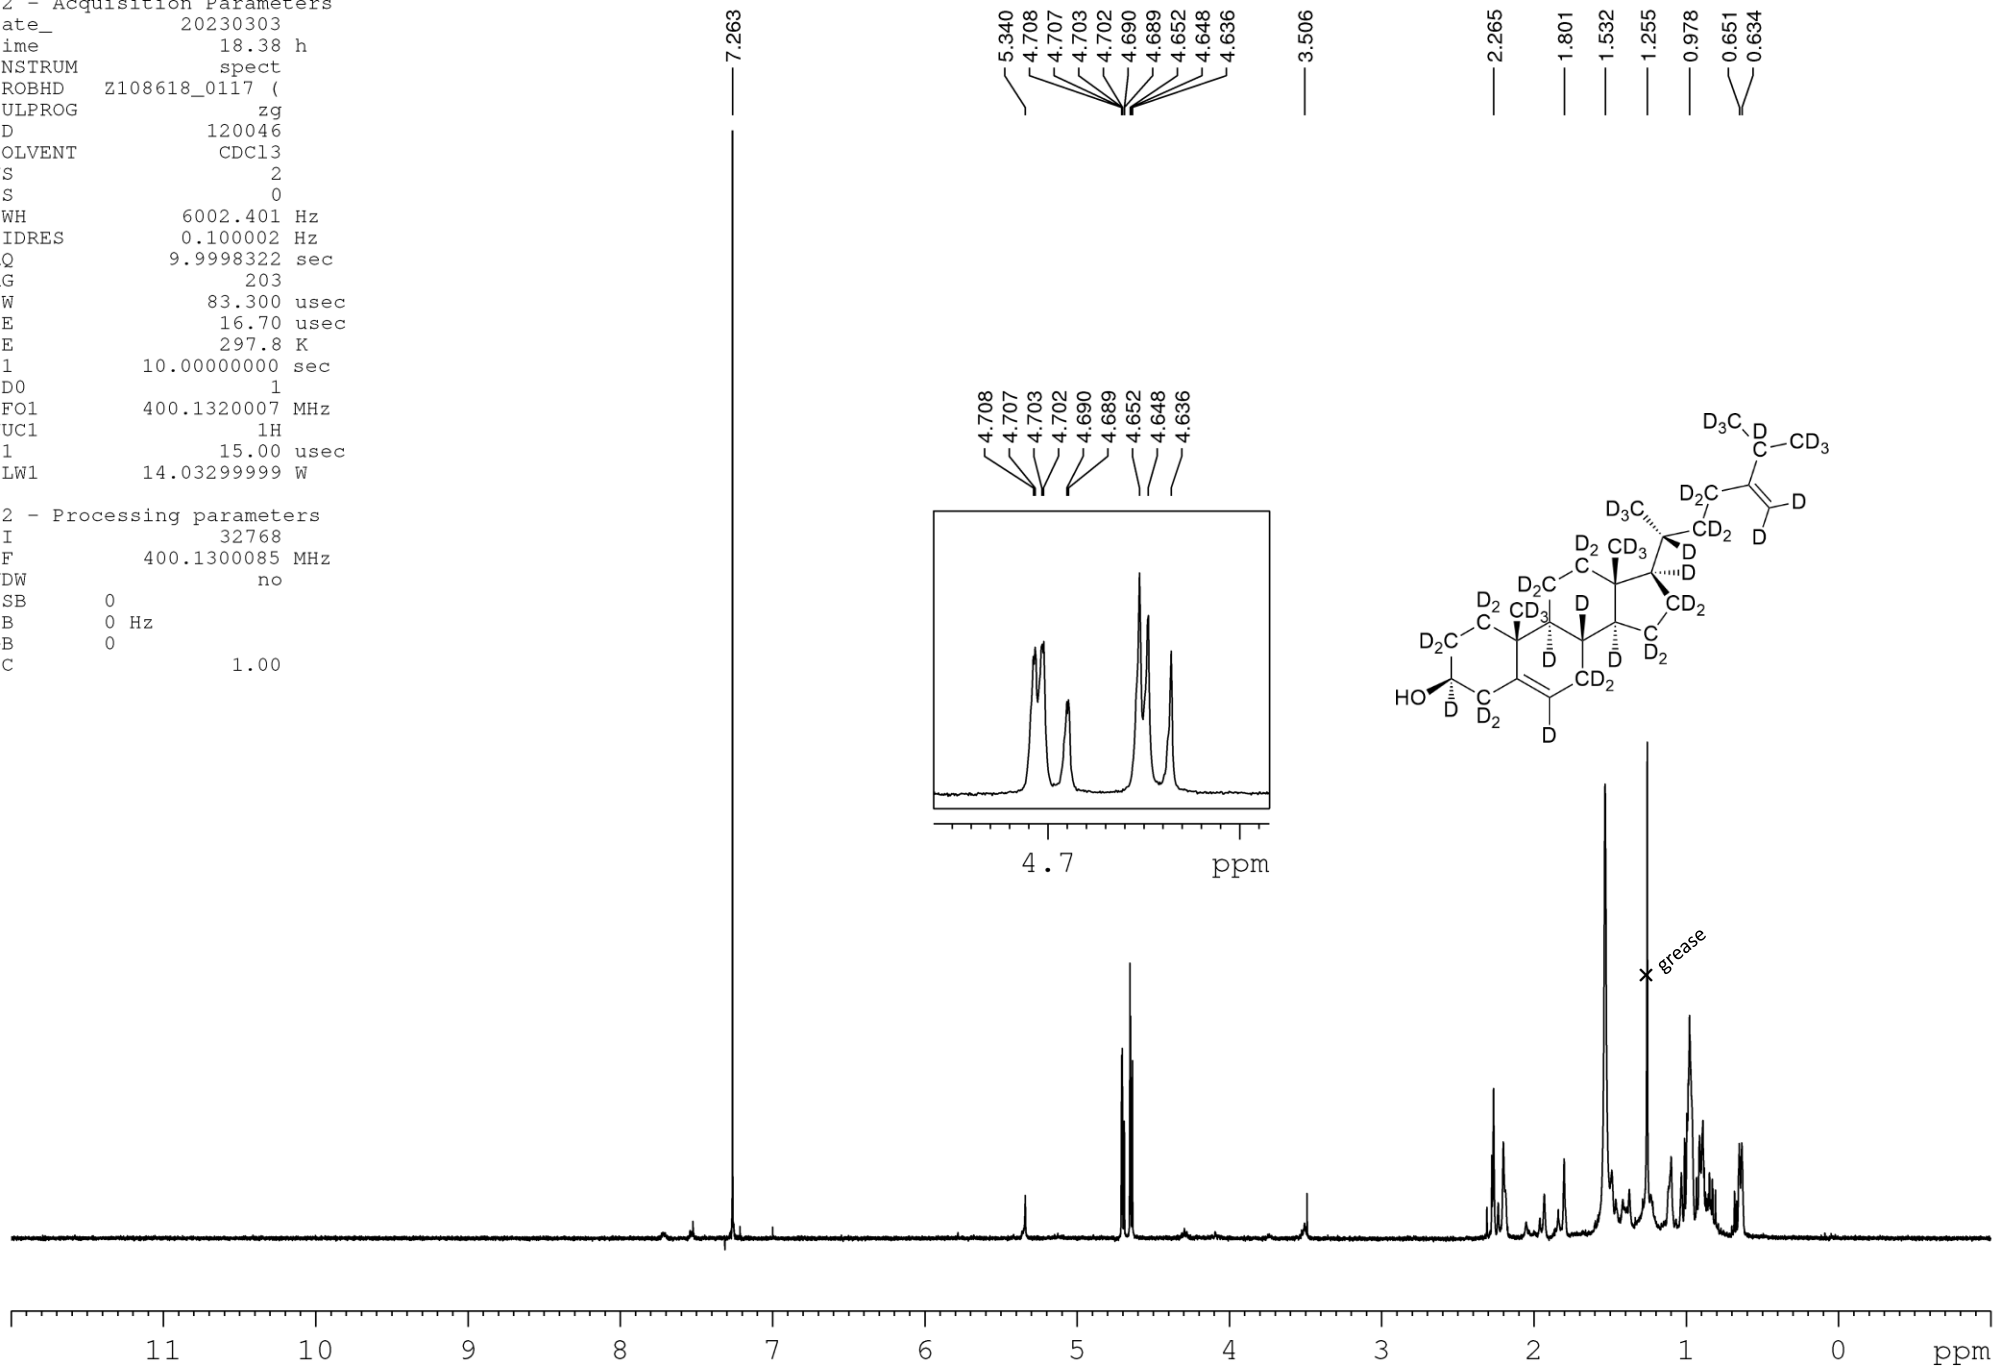

F2 - Acquisition Parameters  
Date\_ 20230301  
Time 15.05 h  
INSTRUM spect  
PROBHD Z108618\_0117 (  
PULPROG zg2h  
TD 8192  
SOLVENT CDCl3  
NS 60  
DS 0  
SWH 921.376 Hz  
FIDRES 0.224945 Hz  
AQ 4.4455252 sec  
RG 45.2  
DW 542.667 usec  
DE 23.73 usec  
TE 298.0 K  
D1 5.00000000 sec  
D11 0.03000000 sec  
TD0 1  
SFO1 61.4226988 MHz  
NUC1 2H  
P1 124.00 usec  
PLW1 29.89100075 W

F2 - Processing parameters  
SI 16384  
SF 61.4223931 MHz  
WDW EM  
SSB 0  
LB 0.30 Hz  
GB 0  
PC 1.00

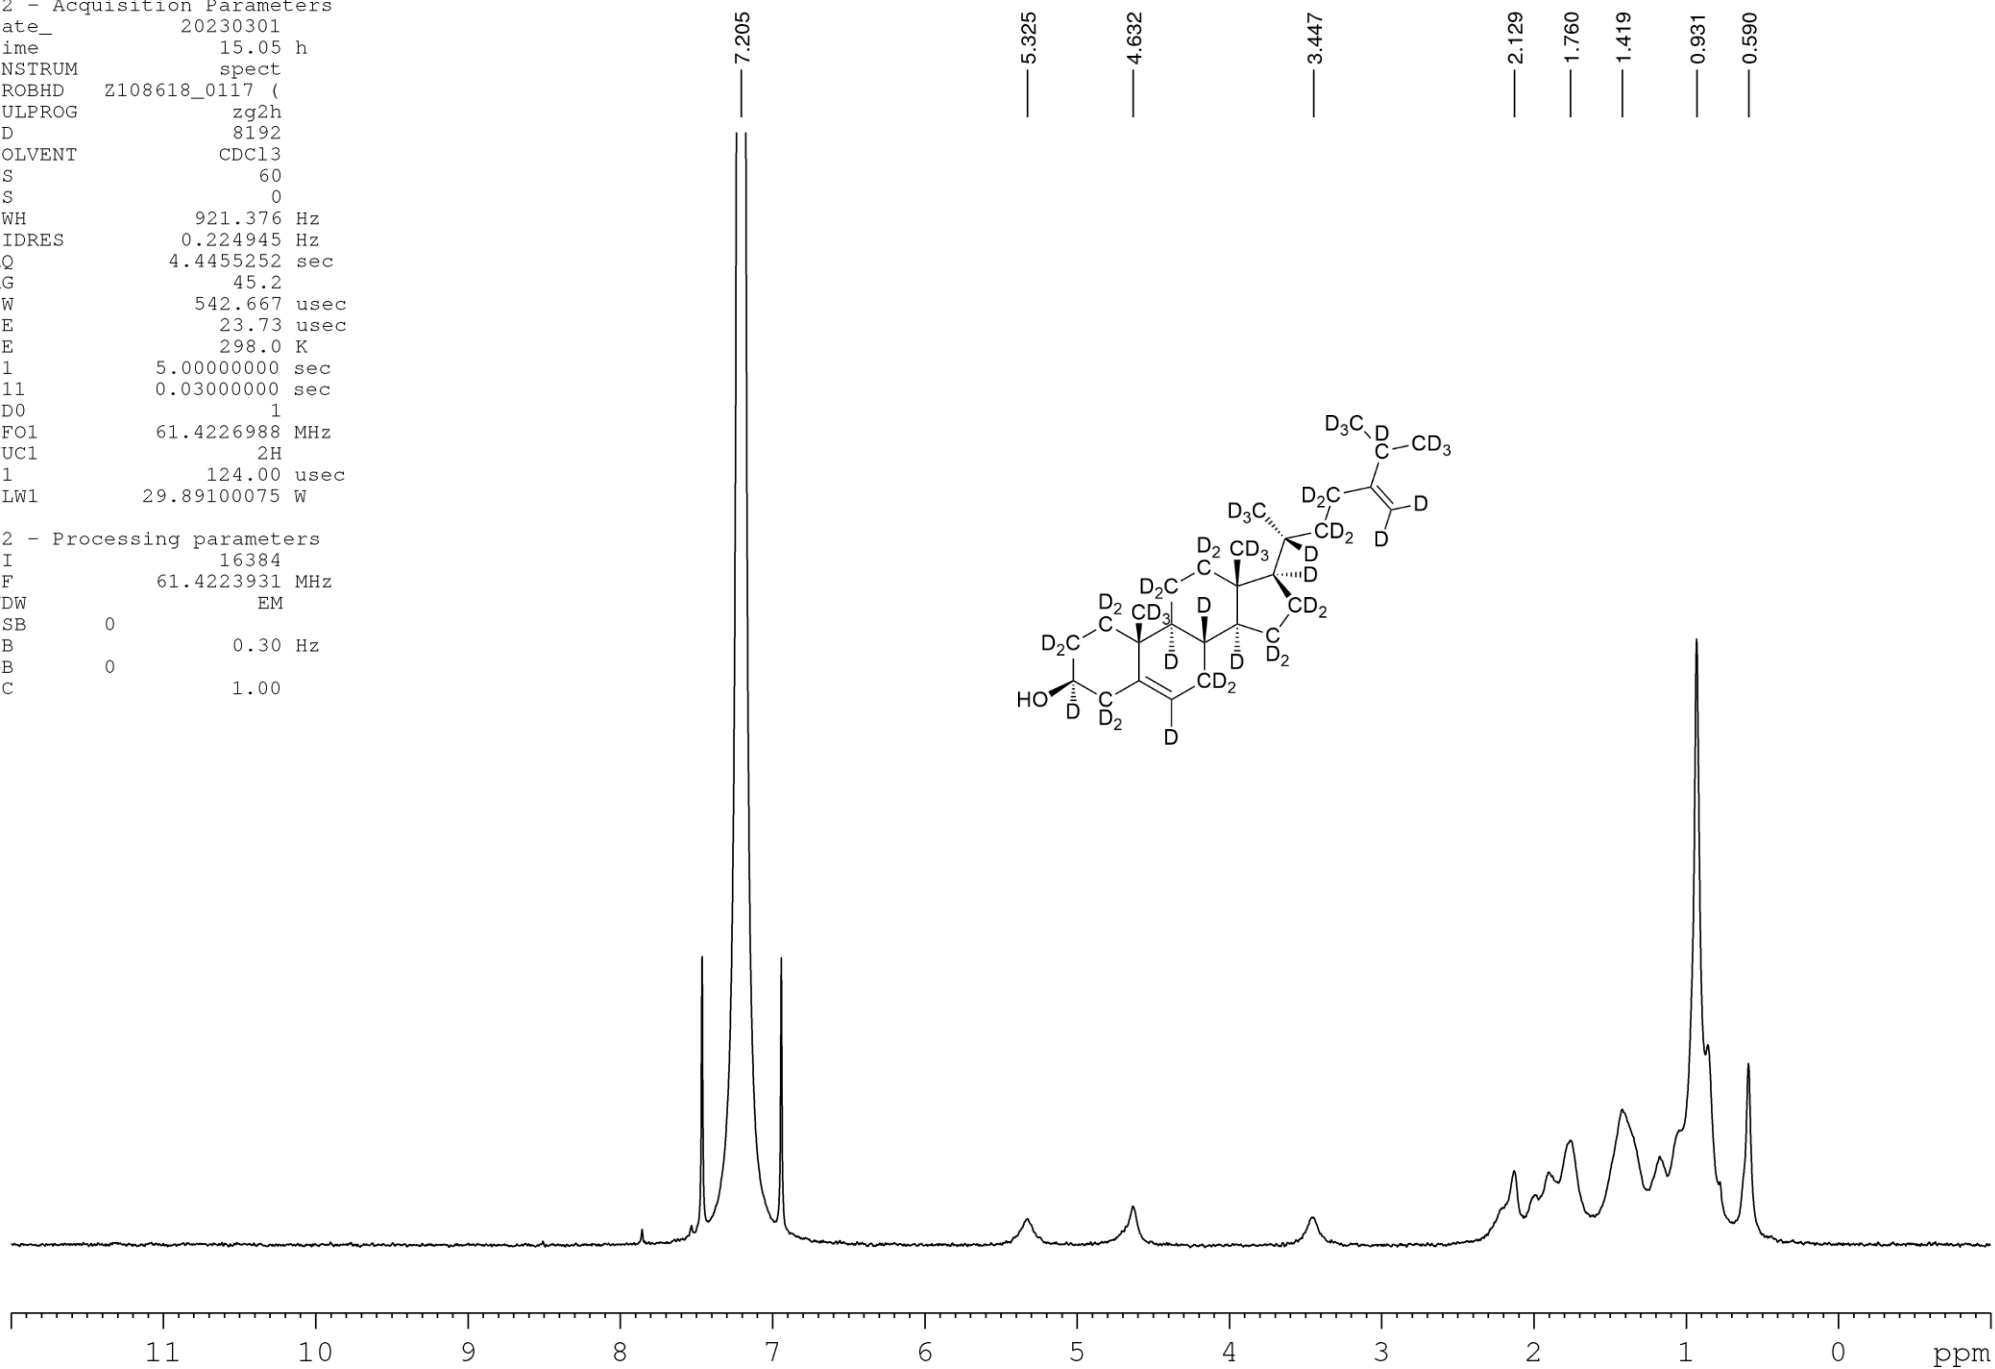

24-methylenecholesterol-*d*<sub>45</sub> (87%-*d*)

<sup>13</sup>C{<sup>1</sup>H,<sup>2</sup>H} NMR

F2 - Acquisition Parameters  
 Date\_ 20230306  
 Time 8.39 h  
 INSTRUM spect  
 PROBHD Z108618\_0117 (  
 PULPROG zgig2h1h  
 TD 65536  
 SOLVENT CDCl3  
 NS 10357  
 DS 0  
 SWH 22058.824 Hz  
 FIDRES 0.673182 Hz  
 AQ 1.4854827 sec  
 RG 203  
 DW 22.667 usec  
 DE 6.50 usec  
 TE 298.1 K  
 D1 20.0000000 sec  
 D11 0.03000000 sec  
 D12 0.00002000 sec  
 TD0 1  
 SFO1 100.6223263 MHz  
 NUC1 13C  
 P1 10.00 usec  
 PLW1 84.53199768 W  
 SFO2 400.1322007 MHz  
 NUC2 1H  
 CPDPRG[2] waltz16  
 PCPD2 90.00 usec  
 PLW2 14.03299999 W  
 PLW12 0.38982001 W  
 SFO3 61.4227600 MHz  
 NUC3 2H  
 CPDPRG[3] waltz16  
 PCPD3 375.00 usec  
 PLW3 29.89100075 W  
 PLW17 3.06999993 W

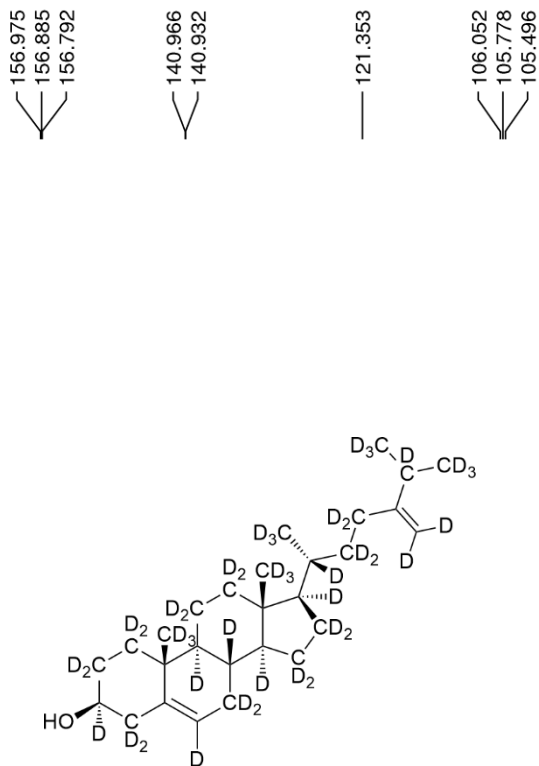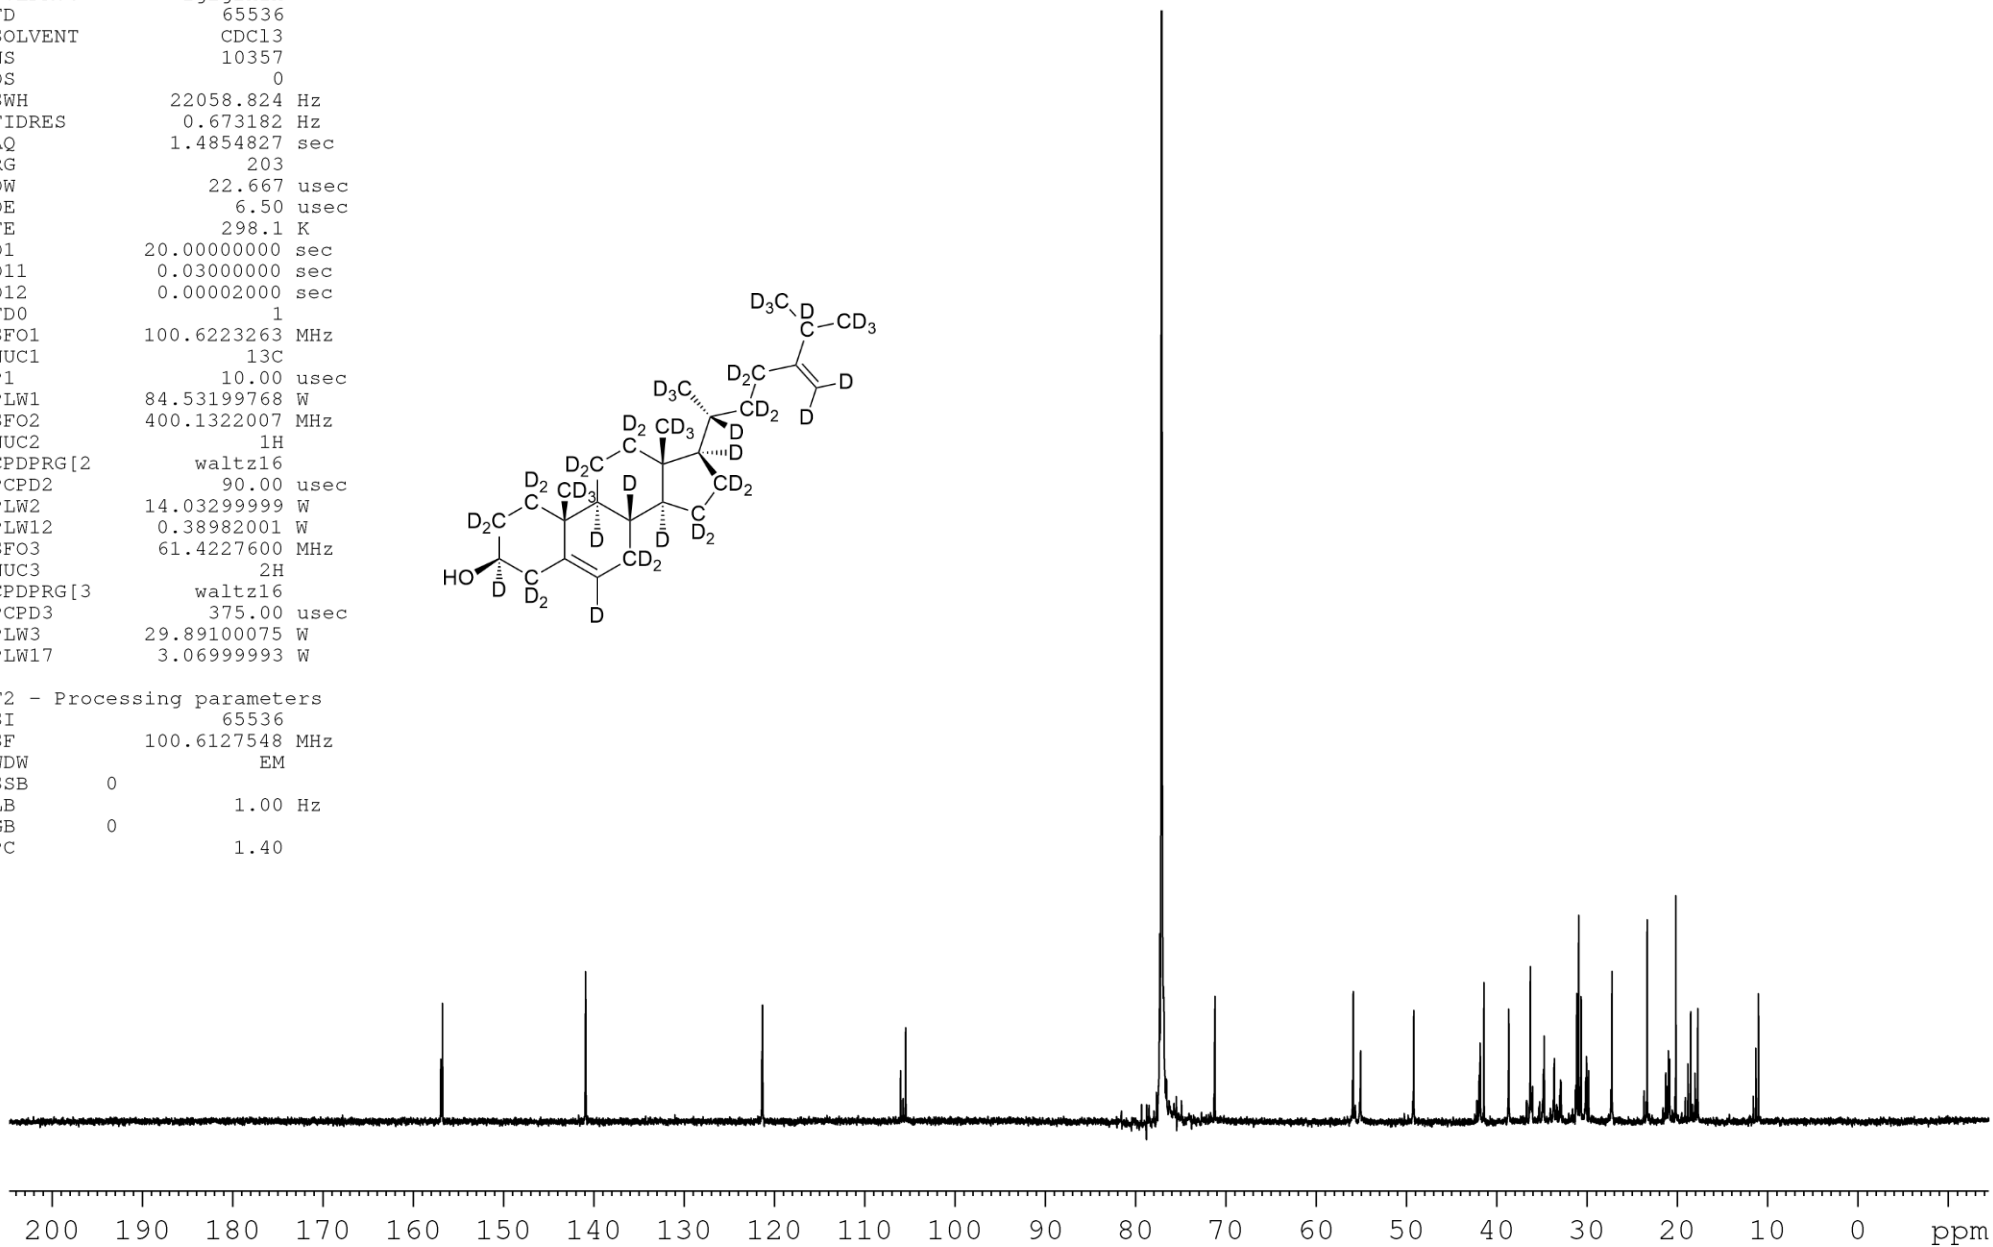

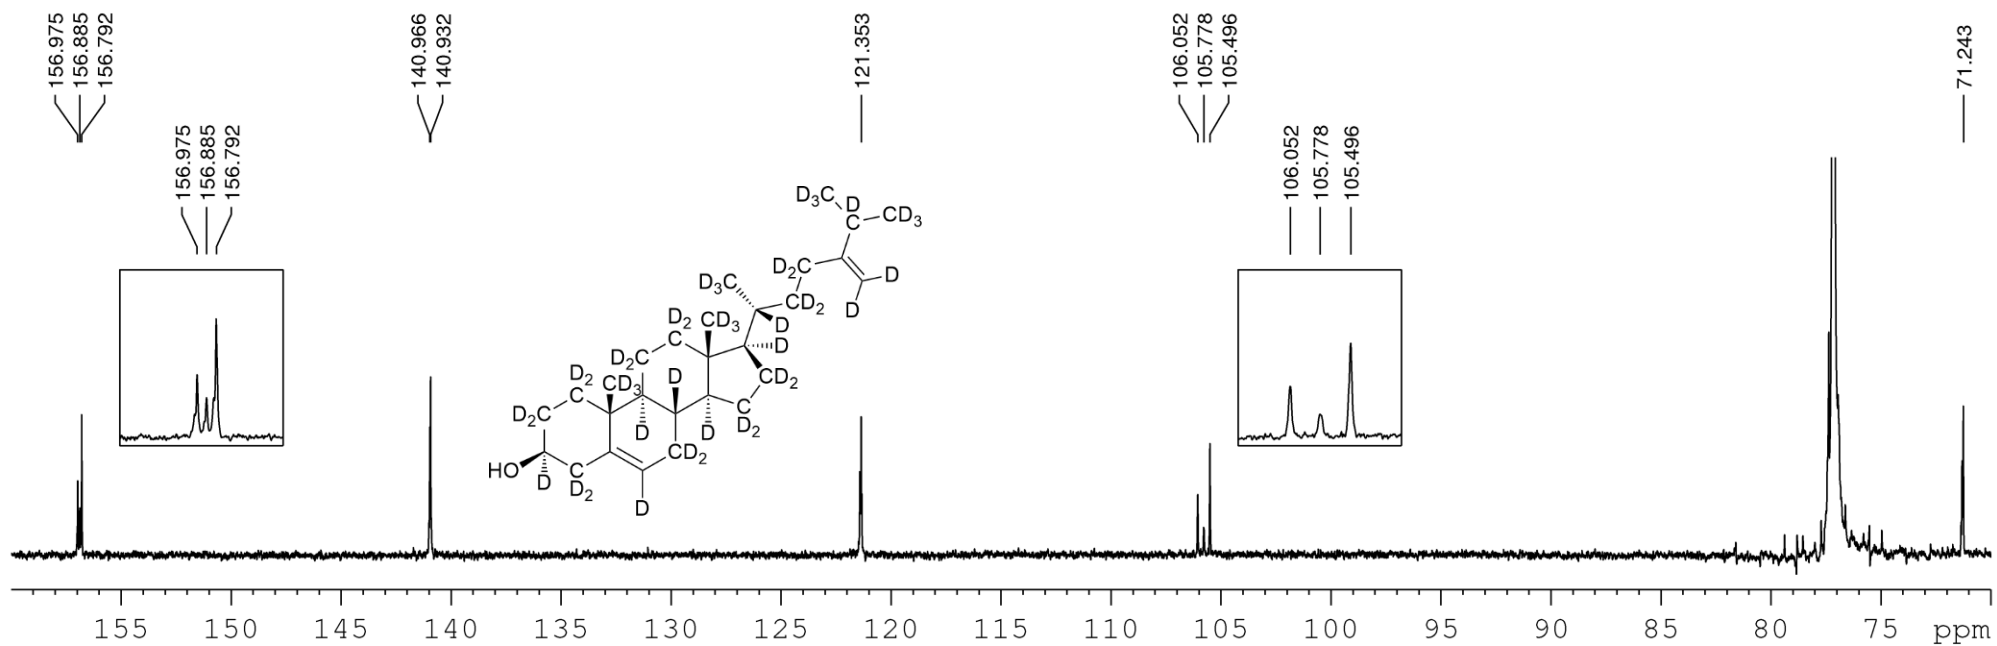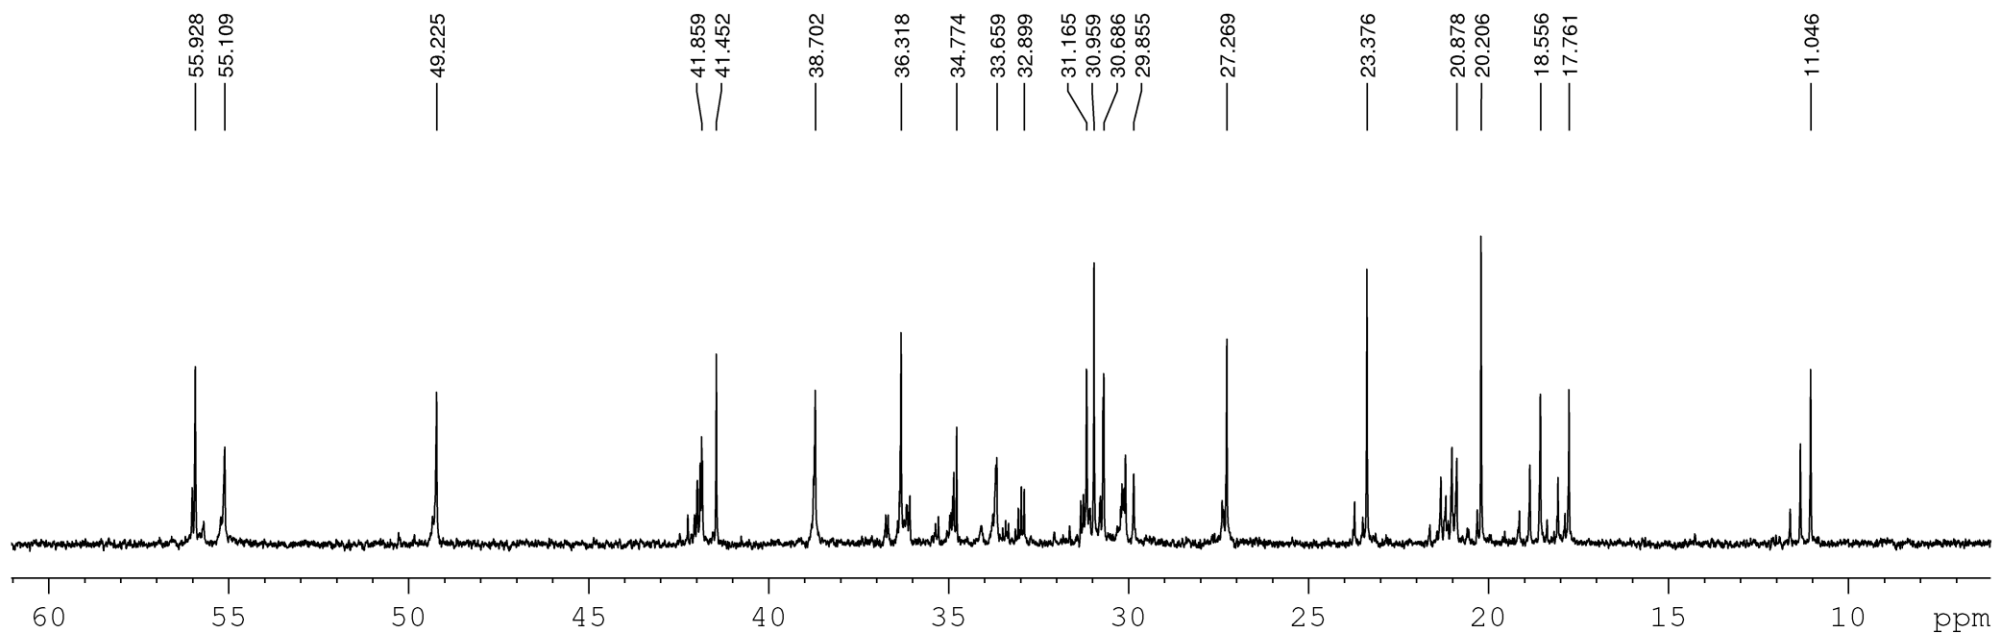



24-methylenecholesterol-*d*<sub>45</sub> (87%-*d*)

<sup>13</sup>C{<sup>1</sup>H} NMR

F2 - Acquisition Parameters  
 Date\_ 20230308  
 Time 8.43 h  
 INSTRUM spect  
 PROBHD Z108618\_0117 (  
 PULPROG zgpg30  
 TD 65536  
 SOLVENT CDCl3  
 NS 15424  
 DS 0  
 SWH 22058.824 Hz  
 FIDRES 0.673182 Hz  
 AQ 1.4854827 sec  
 RG 203  
 DW 22.667 usec  
 DE 8.02 usec  
 TE 298.0 K  
 D1 2.00000000 sec  
 D11 0.03000000 sec  
 TD0 1  
 SFO1 100.6223248 MHz  
 NUC1 13C  
 P1 10.00 usec  
 PLW1 84.53199768 W  
 SFO2 400.1320007 MHz  
 NUC2 1H  
 CPDPRG[2] waltz16  
 PCPD2 90.00 usec  
 PLW2 14.03299999 W  
 PLW12 0.38982001 W  
 PLW13 0.19607000 W

F2 - Processing parameters  
 SI 65536  
 SF 100.6127547 MHz  
 WDW EM  
 SSB 0  
 LB 1.00 Hz  
 GB 0  
 PC 1.40

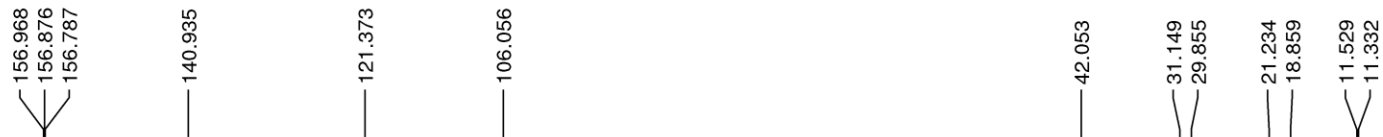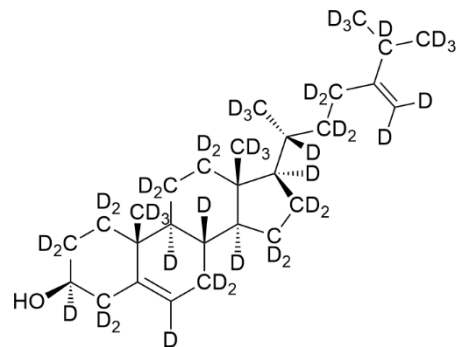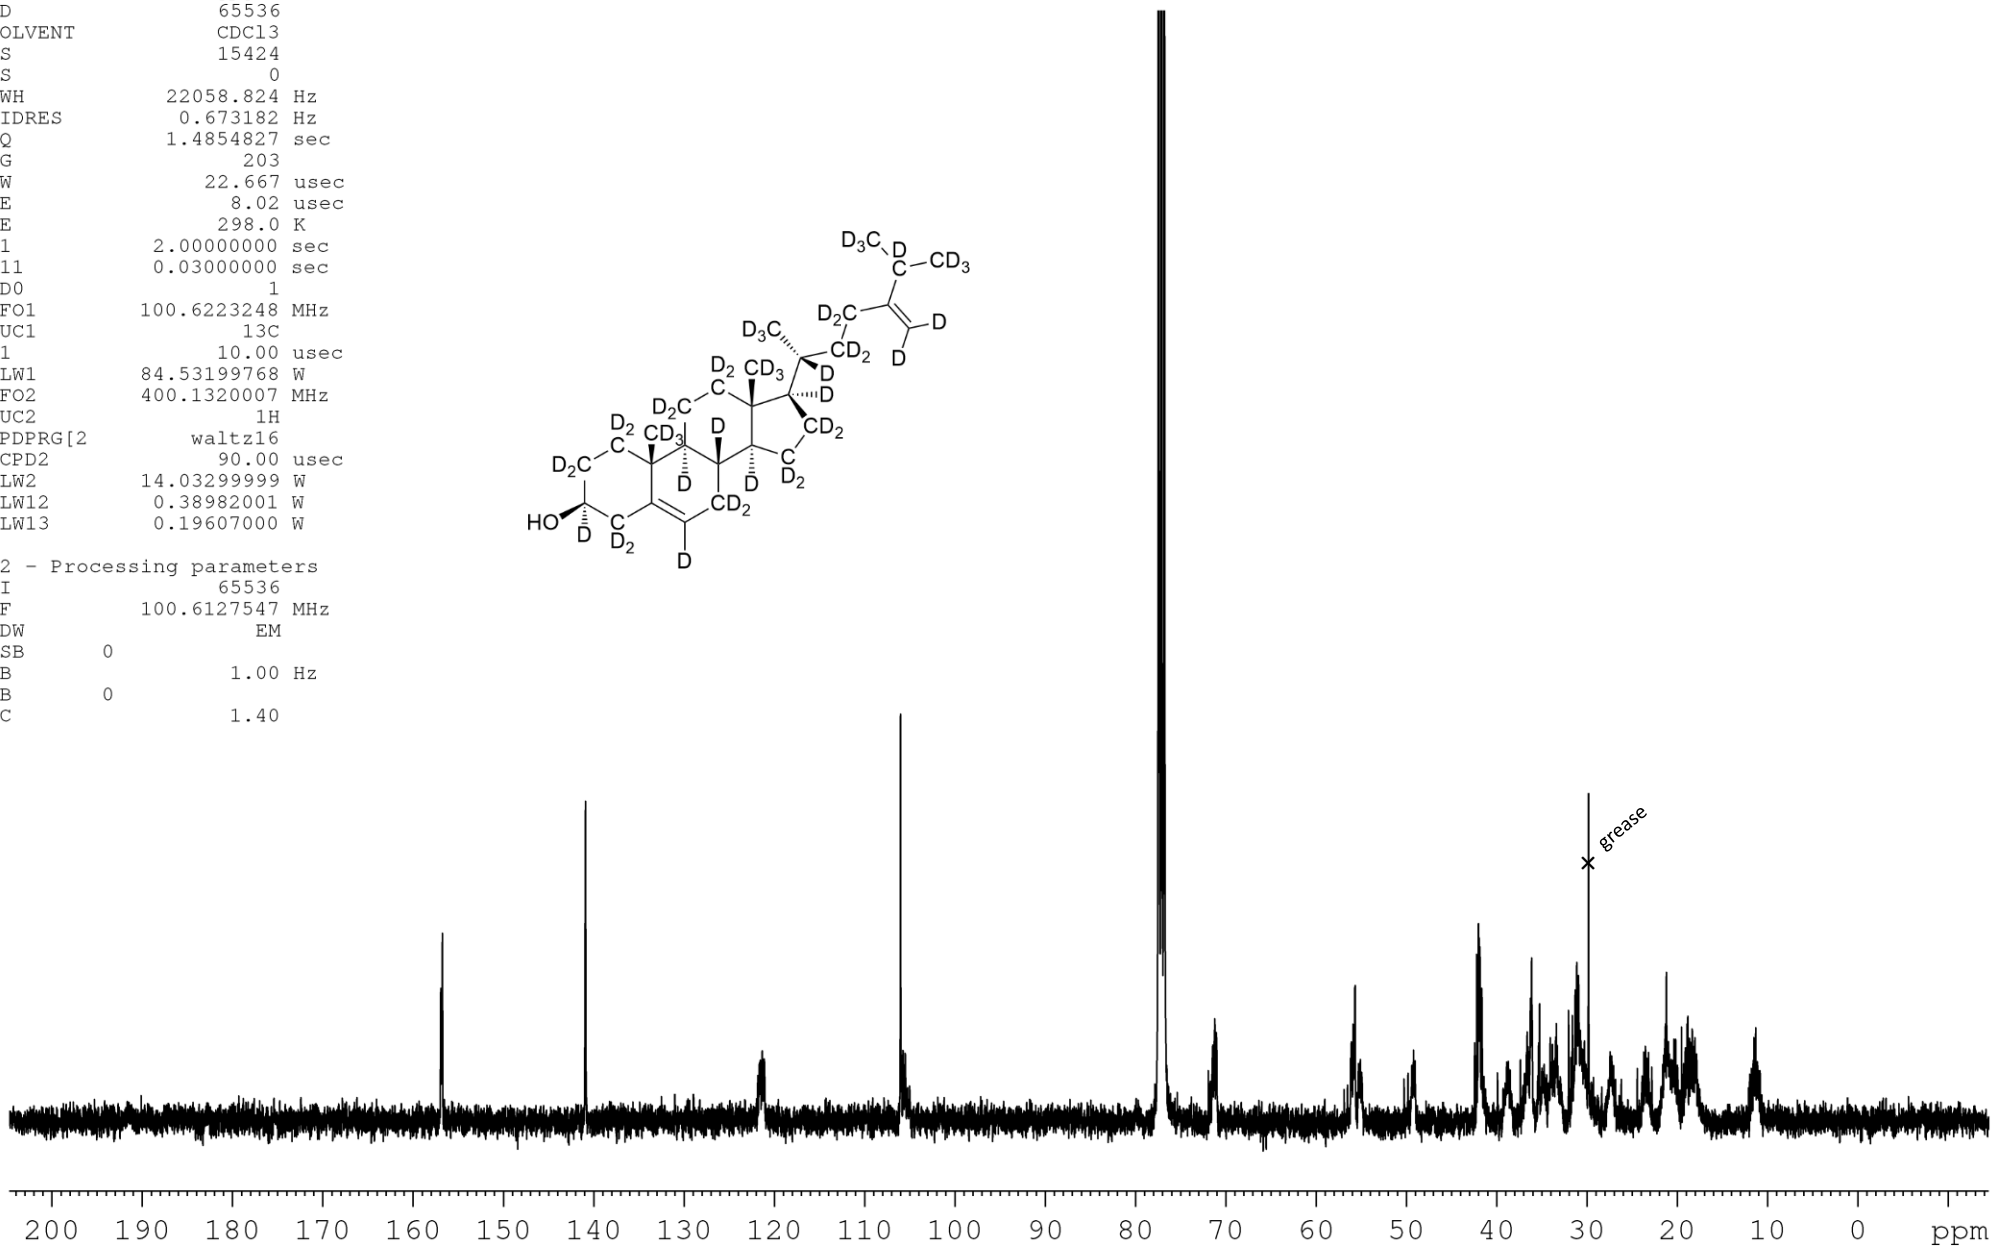

Supplement: d3ob00754e2.pdf [file d3ob00754e2.pdf]
